# Supplementary material for: The MIQE Guidelines: Minimum Information for Publication of Quantitative Real-Time PCR Experiments
Source: Oxford University Press journal article supplement (doi:10.1373/clinchem.2008.112797), 2009-02-27
Supplement: bustin09-04-55-611.pdf [file bustin09-04-55-611.pdf]

# MIQE 指南:发表实时荧光定量 PCR 实验 所需提供的最低信息量

## The MIQE Guidelines: Minimum Information for Publication of Quantitative Real-Time PCR Experiments

Stephen A. Bustin<sup>1,a</sup> Vladimir Benes<sup>2</sup> Jeremy A. Garson<sup>3,4</sup> Jan Hellemans<sup>5</sup> Jim Huggett<sup>6</sup>  
Mikael Kubista<sup>7,8</sup> Reinhold Mueller<sup>9</sup> Tania Nolan<sup>10</sup> Michael W. Pfaffl<sup>11</sup>  
Gregory L. Shipley<sup>12</sup> Jo Vandesompele<sup>5</sup> and Carl T. Wittwer<sup>13,14</sup>

**背景** 目前,在实时荧光定量 PCR (real-time quantitative PCR 或 qPCR) 技术的实施和解释方面存在很多问题,缺乏广泛的共识。许多已发表的文献缺乏足够的实验细节,从而阻碍了读者客观评价实验结果质量并进行重复实验的能力。

**内容** 发表实时荧光定量 PCR 实验所需提供的最低信息量 (MIQE) 的主要目的是保证结果的可靠性、确保科学文献的完整性、促进实验室之间的一致性和提高实验的透明度。MIQE 是国际上最新推出的一套指南,就评价 qPCR 实验和发表文章时所必需的实验信息提出了最低限度的标准,其中包括一个向出版者初次提交文章时所要附带的清单。通过提供相关的实验条件和分析特性,评阅人员可以更好的评估研究者实验方案的有效性。同时应该充分披露所用的试剂、序列和分析方法,以保证其他研究者能够重现实验结果。MIQE 细节可通过缩写或在线补充的形式进行发表。

**总结** 通过指南可以更好进行实验操作,并得到更可靠和解释更明确的 qPCR 实验结果。

以荧光定量检测为基础的实时荧光定量 PCR (qPCR)<sup>[1-3]</sup> 技术,能够检测和衡量不同样本来源中

的微量核酸,强大的定量检测灵敏度使其广泛应用在分子诊断学、生命科学、农业和医药领域<sup>[4,5]</sup>。qPCR 技术具有操作简便、检测速度快、灵敏度高、同源分析特异性强等优点,是分子生物学研究中的重要工具。除了作为研究工具以外,许多诊断应用也被相继开发,包括微生物的定量、基因剂量的测定、转基因食品鉴定、癌症复发的风险评估和法医鉴定等<sup>[6-11]</sup>。

qPCR 应用的普及性也充分反映在近年文章发表数量的惊人增长上,而这些文章往往使用不同的试剂、程序、分析方法和报告格式。这些缺乏明显一致性的 qPCR 实验及结果判断,引起了一连串的不良后果,妨碍了 qPCR 技术更好的发展<sup>[12]</sup>。技术的缺陷影响了分析结果,主要表现在:(1) 不适当的样本储存、制备和核酸模板的质量差异,导致不同的实验结果;(2) 反转录引物和 PCR 引物及探针的低劣选择,造成较低的反应效率和较差的性能;(3) 不恰当的数据和统计分析,产生了误导性极强的结果。随着大量无统计学意义和结果相互矛盾的文章的发表,科学文献存在真实的危险<sup>[13]</sup>。被认为是 *Science* 杂志“2005 年重要研究突破”的文章的发表<sup>[14]</sup> 及以后的撤销<sup>[15]</sup> 给我们敲响了警钟。许多报道 qPCR

<sup>1</sup> Centre for Academic Surgery, Institute of Cell and Molecular Science, Barts and the London School of Medicine and Dentistry, London, UK;

<sup>2</sup> Genomics Core Facility, EMBL Heidelberg, Heidelberg, Germany;

<sup>3</sup> Centre for Virology, Department of Infection, University College London, London, UK; <sup>4</sup> Department of Virology, UCL Hospitals NHS Foundation Trust, London, UK; <sup>5</sup> Center for Medical Genetics, Ghent University Hospital, Ghent, Belgium; <sup>6</sup> Centre for Infectious Diseases, University College London, London, UK; <sup>7</sup> TATAA Biocenter, Göteborg, Sweden;

<sup>8</sup> Institute of Biotechnology AS CR, Prague, Czech Republic;

<sup>9</sup> Sequenom, San Diego, California, USA; <sup>10</sup> Sigma-Aldrich, Haverhill,

UK; <sup>11</sup> Physiology Weihenstephan, Technical University Munich,

Freising, Germany; <sup>12</sup> Quantitative Genomics Core Laboratory, Department of Integrative Biology and Pharmacology, University of Texas Health

Science Center, Houston, Texas, USA; <sup>13</sup> Department of Pathology, University of Utah, Salt Lake City, Utah, USA; <sup>14</sup> ARUP Institute for Clinical and Experimental Pathology, Salt Lake City, Utah, USA.

\* Address correspondence to this author at: 3rd Floor Alexandra Wing, The Royal London Hospital, London E1 1BB, UK. Fax:44-(0)20-7377 7283; E-mail:s. a. bustin@qmul. ac. uk.

技术的文章对实验细节描述不够充分,缺乏特定信息,从而产生了一些严重的问题。例如有些文章缺少样品采集和处理的信息,尤其缺乏 RNA 质量和完整性的评价信息和反转录的细节等;还有些文章缺少对 PCR 反应效率和分析参数的描述,特别是去掉了目的基因相对于参照基因的标准化过程。这些不完整的数据使读者无法客观评价实验结果的可靠性和重现性。

本指南旨在向作者、评阅人员和编辑提供 qPCR 实验必须报告的最低信息量标准,见表 1 清单,以保证分析结果的相关性、准确性、解释的正确性和重现性。MIQE(实时荧光定量 PCR 实验发表所需提供的最低信息量,亦称 myke) 仿效以下标准制定: DNA 芯片分析<sup>[16]</sup>、蛋白质组学实验<sup>[17]</sup>、基因组序列指标<sup>[18]</sup>、RNA 干扰<sup>[19,20]</sup>和代谢组学<sup>[21]</sup>,其中后两个标准正在讨论之中尚未公布。以上所有指南都被收录到 MIBBI(生物和生物医学研究需报告的最低信息标准,见网页 <http://www.mibbi.org>)<sup>[22]</sup> 旗下。现有指南的强制实施标准中不包括统一的报告语言,但为了实现资源共享,该指南的升级版可能会包括此项建议。MIQE 主要目的是保证结果的可靠性、确保科学文献的完整性、促进实验室之间的一致性和提高实验的透明度。欲深入了解 qPCR 的标准化问题,建议同时阅读近期发表的一些文章<sup>[23-26]</sup>。

MIQE 指南的主要内容包括以下几个方面:

#### 一、学术用语

为确保用词更加规范,有几个词语需要标准化:

1. 我们建议用“qPCR”作为“实时定量 PCR”的缩写,“RT-qPCR”用作“反转录 qPCR”的缩写。以“RT-PCR”作为“实时定量 PCR”(real time PCR)的缩写会引起概念的混淆,而且与其传统的反转录 PCR 的意思不相符。

2. 用于标准化的基因应称为“参照基因”(reference genes),而不是“管家基因”(housekeeping genes)。

3. “TaqMan”探针应称作“水解探针”(Hydrolysis Probes)。

4. “FRET”探针指“荧光共振能量转移探针”,采用了一种通用的机制,即激发/淬灭过程依赖于 2 个荧光染料分子激发态间的相互作用。“LightCycler 型探针”应被称为“双杂交探针”。

5. 牛津英语辞典中的“定量”一词只有“quantification”,没有“quantitation”,因此,应该采用前者。

6. 用于描述 qPCR 循环次数的术语不一致,目前文献中使用的分别有 threshold cycle (Ct)、crossing point (Cp) 和 take-off point (TOP)。所有这些术语对于实时 PCR 仪器而言数值相同,只不过是不同仪器厂家根据不同产品而杜撰的词条,没有科学准确性或明确性。根据 RDML(实时 PCR 数据标记语言)的数据标准(<http://www.rdml.org>)<sup>[27]</sup>,我们建议使用“quantification cycle (Cq)”表示定量循环数。

#### 二、概念上的考虑

为了解释和说明该指南,我们认为有必要重新定义 qPCR 实验的一些关键词语:

1. 分析灵敏度:分析灵敏度是指单次分析中能够准确测定的样本的最小拷贝数(浓度),而临床灵敏度是指患有特定疾病的个人在检测该疾病时得到阳性结果的概率。通常情况下,灵敏度以检测限(LOD)表示,指特定的分析程序在某一置信水平(通常采用 95% 的概率值)下检测到的最低样本浓度。假设数据符合泊松分布,理论上最灵敏的检测限为每次 PCR 循环 3 个拷贝数<sup>[28]</sup>,95% 的置信水平下单次 PCR 至少有 1 个拷贝,即单拷贝检测。实验程序通常包括样品处理过程(如“提取”),必要时也包括反转录。如果将这些过程的体积变化和效率计算在内,理论上最灵敏的检测限可以用实验相关的单位表示,如每纳克组织中的拷贝数。低于理论上检测限可能值的实验结果绝不能报告。同时应该注意结果为“0”是毫无意义的和误导的。因为在 qPCR 分析中通过对 Cq 取对数来计算 LOD,当模板浓度为零时 Cq 是没有意义的。LOD 适当的测定方法和模型是 qPCR 分析下一步研究的重点<sup>[26]</sup>。

2. 分析特异性:分析特异性是指 qPCR 分析在样本中有其他物质存在时只检测目标序列的能力。诊断特异性是指未患某种疾病的个人在检测该疾病时得到阴性结果的概率。

3. 准确度:准确度指实验测定浓度与实际浓度的差异,以差异倍数和拷贝数的估计值表示。

4. 重复性:重复性(短期精密度或批内变异)指的是同一方法分析同一样本的精密度和耐用性(robustness)。可通过 SD 描述 Cq 的变异,SD 或 CV 表示拷贝数或浓度的变异。然而,多个 Cq 间的变异不能通过 CV 表示<sup>[29]</sup>。

5. 重现性:重现性(长期精密度或批间方差)指批间结果或不同实验室内结果的变异,通常以拷贝数或浓度的 SD 或 CV 表示。由于不同批次下的 C<sub>q</sub> 值受固有批间变异的影响<sup>[30]</sup>,因此报告批间 C<sub>q</sub> 值

**Table 1. MIQE checklist for authors, reviewers, and editors.<sup>a</sup>**

| Item to check                                                                     | Importance     | Item to check                                                            | Importance     |
|-----------------------------------------------------------------------------------|----------------|--------------------------------------------------------------------------|----------------|
| Experimental design                                                               |                | qPCR oligonucleotides                                                    |                |
| Definition of experimental and control groups                                     | E              | Primer sequences                                                         | E              |
| Number within each group                                                          | E              | RTPrimerDB identification number                                         | D              |
| Assay carried out by the core or investigator's laboratory?                       | D              | Probe sequences                                                          | D <sup>d</sup> |
| Acknowledgment of authors' contributions                                          | D              | Location and identity of any modifications                               | E              |
| Sample                                                                            |                | Manufacturer of oligonucleotides                                         | D              |
| Description                                                                       | E              | Purification method                                                      | D              |
| Volume/mass of sample processed                                                   | D              | qPCR protocol                                                            |                |
| Microdissection or macrodissection                                                | E              | Complete reaction conditions                                             | E              |
| Processing procedure                                                              | E              | Reaction volume and amount of cDNA/DNA                                   | E              |
| If frozen, how and how quickly?                                                   | E              | Primer, (probe), Mg <sup>2+</sup> , and dNTP concentrations              | E              |
| If fixed, with what and how quickly?                                              | E              | Polymerase identity and concentration                                    | E              |
| Sample storage conditions and duration (especially for FFPE <sup>b</sup> samples) | E              | Buffer/kit identity and manufacturer                                     | E              |
| Nucleic acid extraction                                                           |                | Exact chemical composition of the buffer                                 | D              |
| Procedure and/or instrumentation                                                  | E              | Additives (SYBR Green I, DMSO, and so forth)                             | E              |
| Name of kit and details of any modifications                                      | E              | Manufacturer of plates/tubes and catalog number                          | D              |
| Source of additional reagents used                                                | D              | Complete thermocycling parameters                                        | E              |
| Details of DNase or RNase treatment                                               | E              | Reaction setup (manual/robotic)                                          | D              |
| Contamination assessment (DNA or RNA)                                             | E              | Manufacturer of qPCR instrument                                          | E              |
| Nucleic acid quantification                                                       | E              | qPCR validation                                                          |                |
| Instrument and method                                                             | E              | Evidence of optimization (from gradients)                                | D              |
| Purity (A <sub>260</sub> /A <sub>280</sub> )                                      | D              | Specificity (gel, sequence, melt, or digest)                             | E              |
| Yield                                                                             | D              | For SYBR Green I, C <sub>q</sub> of the NTC                              | E              |
| RNA integrity: method/instrument                                                  | E              | Calibration curves with slope and y intercept                            | E              |
| RIN/RQI or C <sub>q</sub> of 3' and 5' transcripts                                | E              | PCR efficiency calculated from slope                                     | E              |
| Electrophoresis traces                                                            | D              | Clis for PCR efficiency or SE                                            | D              |
| Inhibition testing (C <sub>q</sub> dilutions, spike, or other)                    | E              | r <sup>2</sup> of calibration curve                                      | E              |
| Reverse transcription                                                             |                | Linear dynamic range                                                     | E              |
| Complete reaction conditions                                                      | E              | C <sub>q</sub> variation at LOD                                          | E              |
| Amount of RNA and reaction volume                                                 | E              | Clis throughout range                                                    | D              |
| Priming oligonucleotide (if using GSP) and concentration                          | E              | Evidence for LOD                                                         | E              |
| Reverse transcriptase and concentration                                           | E              | If multiplex, efficiency and LOD of each assay                           | E              |
| Temperature and time                                                              | E              | Data analysis                                                            |                |
| Manufacturer of reagents and catalogue numbers                                    | D              | qPCR analysis program (source, version)                                  | E              |
| C <sub>q</sub> s with and without reverse transcription                           | D <sup>c</sup> | Method of C <sub>q</sub> determination                                   | E              |
| Storage conditions of cDNA                                                        | D              | Outlier identification and disposition                                   | E              |
| qPCR target information                                                           |                | Results for NTCs                                                         | E              |
| Gene symbol                                                                       | E              | Justification of number and choice of reference genes                    | E              |
| Sequence accession number                                                         | E              | Description of normalization method                                      | E              |
| Location of amplicon                                                              | D              | Number and concordance of biological replicates                          | D              |
| Amplicon length                                                                   | E              | Number and stage (reverse transcription or qPCR) of technical replicates | E              |
| In silico specificity screen (BLAST, and so on)                                   | E              | Repeatability (intraassay variation)                                     | E              |
| Pseudogenes, retropseudogenes, or other homologs?                                 | D              | Reproducibility (interassay variation, CV)                               | D              |
| Sequence alignment                                                                | D              | Power analysis                                                           | D              |
| Secondary structure analysis of amplicon                                          | D              | Statistical methods for results significance                             | E              |
| Location of each primer by exon or intron (if applicable)                         | E              | Software (source, version)                                               | E              |
| What splice variants are targeted?                                                | E              | C <sub>q</sub> or raw data submission with RDML                          | D              |

<sup>a</sup> All essential information (E) must be submitted with the manuscript. Desirable information (D) should be submitted if available. If primers are from RTPrimerDB, information on qPCR target, oligonucleotides, protocols, and validation is available from that source.

<sup>b</sup> FFPE, formalin-fixed, paraffin-embedded; RIN, RNA integrity number; RQI, RNA quality indicator; GSP, gene-specific priming; dNTP, deoxynucleoside triphosphate.

<sup>c</sup> Assessing the absence of DNA with a no-reverse transcription assay is essential when first extracting RNA. Once the sample has been validated as DNA free, inclusion of a no-reverse transcription control is desirable but no longer essential.

<sup>d</sup> Disclosure of the probe sequence is highly desirable and strongly encouraged; however, because not all vendors of commercial predesigned assays provide this information, it cannot be an essential requirement. Use of such assays is discouraged.

是不恰当的。

描述目标基因 mRNA 浓度的文章要将目标明

确的表示出来。大多数人类基因和其他多细胞生物体的许多基因在转录过程中会发生选择性剪

接<sup>[31,32]</sup>,不同组织或不同发展阶段发生剪接的类型不同,这些剪接变异体又选择性地产生了不同的蛋白质异构体。基于单个外显子分析的 RT-qPCR 测定能检测到其中一些剪接变异体,含有内含子的引物分析选择性更高,但都可能漏检某些剪接变异体。例如最近的一篇文章报道了常染色体非印迹基因在表达时出现等位基因失衡现象<sup>[33]</sup>。总而言之,所有这些研究结果都说明:以 1 个或 2 个 mRNA 外显子为简单目标的 RT-qPCR 分析不足以描述一个特定基因的表达水平。文章中必须同时提供以下信息:引物序列信息、引物相对于特定剪接变异体的特异性评价信息、有文件证明的转录过程中单核苷酸多态性的位置信息和所使用的单核苷酸多态性数据库。这些要求对于选自 RTprimerDB 数据库<sup>[34,35]</sup>的引物很容易,我们可以通过访问 RTprimerDB 网站 (<http://www.rtpimerdb.org>) 查找所有相关信息。强烈反对未通过认证的商业化方法和仅通过生物信息学软件认证的检测方法提供的结果。

值得注意的是,通过检测 mRNA 存在与否研究此 mRNA 是否会被翻译成蛋白质或功能性蛋白质的所有信息是否被完全翻译,是毫无意义的。

免疫组织化学、免疫印迹或其他蛋白定量方法不一定总能证实细胞内 mRNA 的定量数据。因为 mRNA 浓度和相应蛋白质浓度之间往往缺乏一致性<sup>[36]</sup>,如果此蛋白质是多功能蛋白复合物的一部分,那么不一致性就更加明显<sup>[37]</sup>。为了更好的掌握基因的表达情况,我们需要了解特定 microRNAs 的存在和功能及 mRNA 种类的知识<sup>[38]</sup>。

大多数定量 RNA 的数据不是绝对值,而是相对值。因此,用于标准化的参照基因或材料很重要,任何关于 RT-qPCR 实验有效性的评估必须同时考虑相应定量参考物的适宜性。因此,尽管通用的参考 DNA 和 RNA 校准材料是非常有用的<sup>[39,40]</sup>,但绝不是万能的<sup>[41,42]</sup>。

RT-qPCR 实验结果的大部分变异并非简单地源于实验程序的变异,而是由各种数据处理算法校正引起的,每种算法都有一个相应的假设。因此,尽管 qPCR 经常被宣称为试金石或金标准,但实际上这个“标准”是可变的,报告结果时应充分考虑到分析和解释的复杂性<sup>[43]</sup>。

### 三、研究应用和诊断应用

qPCR 技术主要有两方面应用,即研究和诊断。在研究领域,分析的样本通常具有以下特点:来源广泛、低通量和样品类型不同。目前需要解决的主要

问题是方法的分析灵敏度和特异性,分析灵敏度表示方法能够检测到的最低目标拷贝数,特异性指无模板质控品 (NTCs) 是否能得到可靠的阴性结果。

相反,诊断分析的样本则目标数量有限、高通量和样本类型很少。虽然研究领域存在的问题也同样适用于诊断分析,但临床诊断测定还有其他一些要求:(1)分析的敏感性和特异性,分别指当目标存在时方法测定结果为阳性的概率和当目标不存在时测定得到阴性结果的概率;(2)实验室内和室间的准确度和精确度往往通过室间质评程序进行监测;(3)结果报告的标准、样本是否进行重复测定、对假阳性和假阴性数据的分辨率及使用相同和不同的技术的多个实验室测定结果的相似度。到目前为止,只有两个实验室间的比较研究被发表,这两个研究<sup>[44,45]</sup>都强调了 qPCR 诊断方法标准化的需求。欧盟第七框架计划:SPIDIA (体外诊断通用的分析前工具和程序的标准化和改进计划,见网站 <http://www.spidia.eu>) 里也包含一个实验室间比对计划。

### 四、样本的采集、处理和制备

样品采集过程是造成实验变异的第一个潜在来源,特别是当待测目标为 RNA 时,因为 mRNA 很容易受到样本收集和处理方法的影响。有报道称将新鲜组织保存在冰块中对 RNA 的质量和浓度没有太大影响<sup>[46]</sup>,这种假设对某些 mRNA 和组织可能是可行的,但未必普遍适用,最好谨慎些。因此,详细地报告组织样本的采集来源和是否得到立即处理是很重要的。如果样本没有立即处理,则需要报告其保存的时间和保存条件。

样本的简单描述也很重要。例如,肿瘤活检的显微镜检查可提供活检标本中肿瘤细胞组成的百分比,这个信息应该报告。

核酸提取是第二个关键步骤。提取效率取决于以下几个方面:充分的组织匀浆化、样品类型(例如:体内组织还是对数生长期的培养细胞)、靶组织密度、生理状态(例如:健康、癌症或坏死)、遗传的复杂性以及处理的生物量的数量。因此,必须要提供核酸提取方法的细节、用于测定核酸浓度的方法及相应的质量评价方法。这些细节对于从新鲜冰冻且经过激光捕获显微切割的活检标本中提取的 RNA 特别重要,因为组织制备过程中的变异对 RNA 的产量和质量都具有重大影响<sup>[47]</sup>。

### 五、核酸的质量控制

1. RNA 样品:比较不同的样本时,应保证各样本中含有大致相同量的 RNA,因此需要对所提取的

RNA 进行定量。常用的定量程序(仪器厂商)包括:分光光度法(热电公司的 NanoDrop)、微流控分析(安捷伦科技公司生物分析仪 Bioanalyzer 和伯乐公司的 Experion)、毛细管凝胶电泳(德国 QIAGEN 公司的 QIAxcel)和荧光染料检测(Ambion 公司和 ABI 公司的 RiboGreen)。由于不同的方法产生不同的结果,因此直接比较不同方法的测定结果是很不科学的<sup>[48]</sup>。建议使用荧光 RNA 结合染料(如 RiboGreen)定量 RNA,此法在检测低浓度目标时表现出最佳性能。任何情况下都建议仅使用单一方法测定所有样本并报告相关信息。检测和报告全基因组 DNA 的污染程度,并记录能够耐受的这些污染的临界值标准也是非常重要的。另外还应重点报告 RNA 样品是否已经过 RNA 酶处理(包括酶的类型及反应条件),并报告每个核酸目标在阳性质控品和无反转录质控品存在下  $C_q$  值的比较结果。

此外,还必须提供 RNA 模板的质量评价结果。除非提取的总 RNA 量太低以至于不允许进行质量评价。但产生这种特殊情况是有条件的:从单细胞、血浆、其他无细胞体液、一些激光捕获样品或澄清组织培养基中提取 RNA,或提取操作和 RT-qPCR 测定通过一个连续的、单管实验完成。还需要报告的关键信息包括 RNA 的数量、完整度、不存在反转录或 PCR 抑制剂。值得注意的是 RNA 在体内的降解非常明显,这是 mRNA 为应对环境刺激而进行的自然调节<sup>[49]</sup>。研究人员尚不能控制 RNA 的降解,其表现之一是即使高质量的 RNA 样品也显示出不同的 mRNA 降解差异。

$A_{260}/A_{280}$  的吸收度比值必须在中性 pH 的缓冲盐条件下测定,但如果进行核酸定量分析,特别是测定细胞 mRNA 浓度微小(<10 倍)的差异时,单单提供以上测量信息是远远不够的。还要提供 RNA 纯度的信息,因为 DNA 或酚的存在会改变此比值。另外,至少应该提供凝胶电泳的证据,如果可以最好提供 rRNA 的微流控分析结果<sup>[50]</sup>或参考基因或靶基因的 3':5' 的完整度检测结果<sup>[51]</sup>。使用 Bioanalyzer 或 Experion 系统计算 RNA 完整度或 RNA 质量指标数值的优势在于,这种测定提供了 RNA 样品总体状况的定量信息。但需要注意的是这些数值只是与 rRNA 的质量有关,而不是测定质量的绝对值。3':5' 分析方法要求两种测定的 PCR 效率几乎相同<sup>[51]</sup>,而且受抑制的程度不能有差异。此法对于足以产生可靠结果的 RNA 质量的阈值标准的界定也是有必要的。理想情况下,测定方法应

该以一组“完整性参考基因”为目标,可能没有内含子,3':5' 的阈值比约为 0.2-5。显然,我们需要进一步的研究以建立一个普遍适用的、符合成本效益的、简单的程序来评价 RNA 的完整度。

建议使用稀释的样本或常用的抑制方法如 SPUD 法<sup>[52,53]</sup>检查反转录活性或 PCR 的抑制作用。如果 RNA 样本发生部分降解,这个信息一定要报道,这是至关重要的,因为这样可能会使方法检测低浓度转录水平的灵敏度降低,而且由于降解引起的转录水平的相对差异可能会产生不正确的目标比值结果。

2. DNA 样本:一般情况下, DNA 不会产生很大的降解问题。然而,在法医学领域, DNA 降解程度的评估是一项很重要的工作,例如在犯罪现场恶劣的环境条件下或大规模灾害或涉及多个失踪人员的案件中, DNA 的化学结构可能已经发生降解。PCR 分析的小规模扩增有助于最大限度地减少检测有关的问题,但目前已开发的方法主要用于 DNA 质量的定量测定<sup>[54]</sup>,我们应该考虑将这些方法用于上述的特定目的。

抑制剂的存在会给测定结果带来变异,因此文章中必须说明是否存在抑制剂,以确保不影响 DNA 的测定结果,如病原体检测和相应的定量<sup>[55]</sup>。在样本中加入阳性质控品的方法可用于检测抑制作用<sup>[52]</sup>,但不同 PCR 反应可能会受到不同程度的抑制,这些抑制剂往往是在核酸提取物中与 DNA 共纯化的物质<sup>[56,57]</sup>。因此,常规实验中最好将核酸样本稀释,以证明观察到的  $C_q$  或拷贝数的减少与预期结果是一致的,并报告这些数据。

## 六、反转录

反转录过程给 RT-qPCR 分析带来巨大的变异<sup>[58,59]</sup>。因此,提交文章时必须详细说明 RNA 转化为 cDNA 所采用的实验方案和试剂,包括被反转录的 RNA 的量、引物、酶的类型、酶的用量、温度和反应时间。反转录过程最好在相同的 RNA 浓度下进行 2-3 次重复<sup>[58]</sup>,以保障实验结果的准确性。

## 七、qPCR

发表 qPCR 文章时必须提供以下信息:(1) 每个目的基因和对照基因的数据库检索编号;(2) 每个引物和探针的外显子位置;(3) 寡核苷酸的序列和浓度,包括染料或被修饰的碱基的性质、位置和连接;(4) 聚合酶的浓度和性质;(5) 模板 DNA 或 cDNA 的量;(6) 镁离子的浓度;(7) 缓冲盐精确的化学组成(盐、pH 值和添加剂)及反应体积;(8) qPCR 仪和循环条件。由于使用的耗材会影响热循环,因此需要明确所用的每个管、带或板及制造商。还需

要提供塑料器皿的透明度(如白色或透明)信息,因为不同的塑料对荧光的反射和敏感性不同<sup>[60]</sup>。若使用板,还应该记录密封方法(热合还是粘合),因为密封方法可能会影响板周边样品的蒸发。

由于 PCR 技术的效率高度依赖于所用的引物,因此应提供引物的序列。即便使用市场上购买的引物,这项规定也是完全可行的,因为各公司的引物和探针序列均公布于网上([http://www.primersdesign.co.uk/research\\_with\\_integrity.asp](http://www.primersdesign.co.uk/research_with_integrity.asp))。

此外,大力鼓励将信息提交到公共数据库如 RTprimer DB。随着时间的推移,这些数据库将会成为大众交流中心。

### (一) 二级结构

核酸靶序列的结构(如 RNA 的茎环二级结构)对反转录和 PCR 的效率有重要影响。因此,引物的位置、探针和 PCR 扩增都必须考虑 RNA 模板折叠的问题。相关序列可用核酸折叠软件进行检查,如将“mfold”用于 DNA (<http://mfold.bioinfo.rpi.edu/cgi-bin/dna-form1.cgi>)或 RNA (<http://frontend.bioinfo.rpi.edu/applications/mfold/cgi-bin/rna-form1-2.3.cgi>)。最好能将折叠结构提供给评阅人员。

### (二) 特异性

生物信息学工具如 BLAST 软件或等效的特异性搜索对实验设计非常有用。应将任何明显的同源性假基因或其他未知目标记录在案,并和比对序列一并提供给评阅人员,但特异性必须通过直接的实验数据进行验证(如电泳凝胶、解链曲线图形、DNA 测序、扩增规模和/或限制性酶切)。

能够预测寡核苷酸熔融温度(或称解链温度,  $T_m$ )的算法对实验的最初设计很有用,但最佳的退火温度必须经实验测定。虽然现在不流行对引物进行优化,但较差的退火优化对分析质量有很明显的影响<sup>[51]</sup>。引物二聚体的大量存在,会得到较低的 PCR 反应效率,还可能使基于 SYBR Green I(高灵敏的 DNA 荧光染料)的分析产生假阳性结果。发表文章时应向评阅人员提供一些引物优化的实验证据,最好包括以下内容:退火温度或镁离子的梯度、 $C_q$  值、荧光点数对比循环次数和熔解曲线<sup>[61]</sup>。

### (三) 质控品和定量校准品

在 RT-qPCR 分析中除了上述的无反转录质控品(NRT)外,其他的质控品和定量校准品也必不可少。在使用探针的情况下,无模板质控品(NTC)可用来检测 PCR 污染,并且可以从 SYBR Green I MIQE 反应产物中区分目标产物和意外扩增产物(如引物二聚

体)。每一块反应板或每批样本中都要有 NTC,并且要确立数据排除标准。例如,若最低浓度的未知物的  $C_q$  值为 35,可忽略  $C_q$  值  $\geq 40$  的 NTC 的数据。

从实验样本中提取的核酸阳性质控品可用于监测随方法变异随时间的变化情况,而且在没有标准曲线的各批次测定中也是必不可少的。

定量校准品可用于纯化靶分子,例如合成带有 PCR 扩增子的 RNA 或 cDNA 寡核苷酸、质粒 DNA、克隆到质粒的 cDNA、体外反转录的 RNA、RNA 参考物质、来源于特定生物体样本的 RNA 或 DNA 及国际上公认的生物学标准物质(可得到的)。建议将校准品稀释成特定浓度的载体 tRNA ( $10 \sim 100 \text{ ng}/\mu\text{l}$  的酵母或大肠杆菌)。若进行人类病原体检测,可将校准品用 RNA 或 DNA 的阴性质控品稀释,或用健康人血浆稀释,并在 tRNA 载体的存在下对血浆稀释品进行溶解。特定模板的一系列稀释储备液可耐受几个冰冻-解冻循环过程。若测得  $C_q$  值为  $0.5 \sim 1.0$ ,则应制备一批新的校准品。另外,用作校准曲线的校准品可  $4^\circ\text{C}$  下储存 1 周。

在临床诊断分析上,qPCR 应有独立的被验证过的校准品,如果可能的话,校准品的值应处于分析的线性范围以内。建议使用经提取的阳性和阴性质控品。

### (四) 分析性能

必须测定以下检测性能特点:PCR 的效率、线性动态范围、LOD 和精密性。

1. PCR 的效率:强大和精确的 qPCR 测定通常具有高效率。在报告目的基因相对于参照基因的 mRNA 浓度时,PCR 效率是非常重要的。 $\Delta\Delta C_q$  方法是测定样本和用来标准化的单个参照基因之间浓度差异的最流行的方法之一。如果计算出目的基因与参照基因的  $C_q$  值的差异( $\Delta C_q$ ),就可以将不同样本的  $\Delta C_q$  值直接进行比较。值得注意的是,两个基因的比较,必须在相似的扩增效率下进行。然而最流行的方法不一定是最合适的,相反已经开发了更为普通的定量模型用于校正扩增效率的差异<sup>[62]</sup>和多个参照基因的使用<sup>[30]</sup>。

PCR 扩增效率必须通过校准曲线法建立,因为校准法简单、快速、重现好,保证了 PCR 的平均反应效率、分析灵敏度和检测方法的稳健性。扩增效率要通过校准曲线线性部分的斜率计算,具体计算公式为:PCR 效率 =  $10^{-1/\text{slope} - 1}$ ,即以初始模板浓度的对数为 X 轴(自变量),以  $C_q$  值为 Y 轴(因变量)作图。理论上效率的最大值为 1.00 (或

100%), 此值表明每个循环周期的产物量加倍。理想情况下, 所报道的平均 PCR 效率的 CI (可信区间) 或 SE (误差) 值应该通过两次校准曲线法得到。

发表文章时, 除了要提交每个定量目标的校准曲线外, 还要提供校准曲线的斜率和在 Y 轴上的截距。PCR 效率的差异会产生不同斜率的校准曲线。随着模板量的变化, 目的基因和参照基因  $C_q$  值的差异并非固定不变, 因此, 按照固定  $C_q$  值计算得到的相对浓度是不准确的, 可能会产生误导结果。

大于 40 的  $C_q$  值是可疑的, 由于其效率较低, 建议不要报道。然而这种随意设定  $C_q$  临界值的做法是不科学的, 因为这些值可能很低 (可消除有效的结果) 也可能很高 (能增加假阳性结果)<sup>[26]</sup>。

2. 线性动态范围: PCR 反应的动态范围应该呈线性, 即最高或最低的定量拷贝数应该通过平均校准曲线法得到, 提交的文章应该包括线性动态范围。校准曲线的产生依赖于所使用的模板, 动态范围应跨越至少 3 个数量级, 最好扩大到 5 或 6 个  $\log_{10}$  浓度范围。校准曲线的线性区间必须包括目标核酸的定量范围。由于定量下界的界定往往很混乱, 因此应该报告提交文章中所谓线性范围内最低浓度处的变异。另外还必须报告线性相关系数 ( $r^2$  值), 并且最好提供整个线性动态范围内的 CI 值。

3. 检测限: 检测限定义为能够检测到 95% 的阳性标本的最低浓度。换言之, 将浓度在 LOD 水平处的待测样本进行多次重复测定, 测得无效结果的概率小于 5%。低拷贝 PCR 的出现是随机有限的, 而且不可能发生单次 PCR 的 LOD 值小于 3 个拷贝数的情况。然而, 如果进行多次反应, 则可通过数字 PCR<sup>[29, 63, 64]</sup> 获得低浓度范围的准确定量。事实上, 可将浓度校准品进行有限稀释, 并按照泊松分布计算 PCR 反应的失败率和成功率。

4. 精密度: 引起 qPCR 变异的因素很多, 包括影响退火和变性的温度差异、取样误差导致的浓度变异和随机误差。qPCR 的精密度主要受浓度影响, 并随拷贝数增加而降低。最好进行多次重复测定, 并将以 SD 误差线形式表示的批内变异 (重复性) 和校准曲线的 CI (可信区间) 在图中标示出来。变异系数 CV 不能用来描述  $C_q$ <sup>[29]</sup>, 但可用来表示拷贝数与浓度的变异。技术引起的变异应区别于生物学变异。生物学复制可直接导致组间或不同处理方法间 qPCR 结果的显著性差异。对于诊断分析, 还需要报告不同地点和不同操作者的批间精密度 (重现性)。

## (五) 多重 qPCR

多重 qPCR 大大扩展了 qPCR 的能力<sup>[65, 66]</sup>, 尤其在瞬时检测点突变或多态性分析方面<sup>[67]</sup>。多重 qPCR 要求提供证据证明在同一个管内进行的多个目标基因的准确定量不会受到相互影响, 例如需要证明在多重 PCR 下的分析效率及 LOD 与单一 PCR 反应下的相同。这一点对于低丰度的目标基因和高丰度的目标基因一起扩增时尤其重要。

## 八、数据分析

数据分析包括原始数据的检查、数据质量和可靠性的评价和结果报告的生成。前文已经描述了多种数据收集和处理的策略, 某系统评价结果显示, 不同 qPCR 数据分析方法的性能显著不同<sup>[68]</sup>。

应该提供数据分析方法和置信限评估的详细信息, 及分析软件的性能指标。必须详细说明离群值的确定方法和数据的处理方法。精密度分析要求提供用于评价变异 (如 95% 可信区间) 的统计方法并提供相应浓度或  $C_q$  值。这些信息尽可能包括重复性和重现性数据。如前所述, 提供  $C_q$  值的变异系数 CV 是不合适的<sup>[29]</sup>, 因为计算得到的  $C_q$  值的变异总是比拷贝数的 CV 值低, 会产生误导。另外必须提供准确度的评价方法, 包括所报告的组间差异的显著性等。

1. 标准化: 标准化是产生可靠的 qPCR 分析结果的重要因素, 因为此过程可以控制由抽提率、反转录和扩增效率产生的差异。通过该过程, 可使不同样本的 mRNA 浓度具有可比性。使用参考基因作为内部质控品是细胞 mRNA 数据标准化最通用的方法。尽管使用参考基因被认为是最合适的标准化策略<sup>[69]</sup>, 但对于特定的组织、细胞形式及实验设计而言, 参考基因的使用必须经过实验验证。不幸的是, 虽然操作人员越来越意识到系统验证的重要性以及使用不适合的参考基因潜在的误导效应, 但这些问题仍然被忽视<sup>[70]</sup>。因此, 许多分子生物学分析仍然包含着经过较差标准化的 qPCR 数据。

标准化要求报告目的基因参考基因 mRNA 浓度的比值, 参考基因的 mRNA 应该得到稳定表达, 其丰度应该与样本中 mRNA 的总量有较强的相关性。

用单一参考基因进行标准化是不合理的, 除非研究者能提供证据证明在所述的实验条件下没有表达差异。参考基因的选择优化及最佳数量必须通过实验测定, 此项研究已有文献报道<sup>[71-73]</sup>。

2. 变异: 生物系统的固有变异可能达到或超过实验的组间差异。当使用较多生物学样本以增加实验的统计学显著性时, 常可以观察到这种变异。尽管众多生物样本之间的差异可能很大, 但足够多的

样本量使较小的实验差异被辨别出来。最近有文献提供了处理该类数据的成功例子,内容包含当数据显示有很高的生物变异时,应如何挽救这些有生物学意义的数据<sup>[74]</sup>。很多因素可以产生实验变异,并且影响达到特定统计学效能所需要的生物样本个数。因此,为了确定产生有效结论所需的样本个数,统计效能的分析非常有用。

3. 质量分析:若 PCR 仅用来检测是否存在某个核酸模板,而不是准确定量,则被称为定性 PCR,此技术广泛应用于病原体诊断。定性还是定量 PCR 的分类问题主要取决于 PCR 技术是否对低端灵敏度有要求,有要求的是定性 PCR,相反则是定量 PCR。因此即使是定性 PCR 分析,也需要提供其分析性能的详细信息,尤其应包括 7.4.2 和 7.4.3 中涉及的内容。

## 总 结

目前,关于 qPCR 和 RT-qPCR 分析方法质量保证过程的重要性已被广泛认可<sup>[25,44,75-86]</sup>。qPCR 和传统 PCR 分析的主要区别在于,前者要求能更准确地定量靶核苷酸。我们必须充分认识这一区别,并且认识到传统的 PCR 分析不能直接转化为 qPCR 形式。表 1 提供了一张发表 qPCR 研究报告所需的要素清单。标记为重要(E)的项目是必须提供的,以方便评阅人员评估研究工作并允许其他人进行重复。标记为理想(D)的项目也很重要,应尽可能包括在内,但未必适用于所有情况。当然,应用常识也很重要,在对成百上千的靶核酸表达信号进行初始筛查时,没有必要遵守清单上的所有项目。然而,一旦确定了一组有限的靶核苷酸(少于 20 个),则需要按照清单上列出的项目详细描述分析性能。详细信息参考 <http://www.rdml.org/miqe/>。

总之,该指南主要有 3 个目的:

1. 使作者能够设计和报告更有价值的 qPCR 实验。
2. 使评阅人员和编辑按照相应的标准来评价所提交的文稿的技术质量。
3. 使读者更容易重复按照该指南发表的实验研究

因此,若指南要求的技术得到广泛应用,研究数据将更加统一、可比,最终更加可靠。

作者贡献: *All authors confirmed they have contributed to the intellectual content of this paper and have met the following 3*

*requirements: (a) significant contributions to the conception and design, acquisition of data, or analysis and interpretation of data; (b) drafting or revising the article for intellectual content; and (c) final approval of the published article.*

作者潜在利益冲突声明: *Upon manuscript submission, all authors completed the Disclosures of Potential Conflict of Interest form. Potential conflicts of interest:*

雇佣关系: *J. Hellemans, Biogazelle; J. Vandesompele, Biogazelle; C. T. Wittwer, Idaho Technology.*

顾问和咨询: *R. Mueller, DermTech International.*

股票所有权: *R. Mueller, Sequenom; C. T. Wittwer, Idaho Technology.*

酬劳: *None declared.*

研究基金: *S. A. Bustin, Bowel and Cancer Research, registered charity number 1119105; J. Hellemans, Fund for Scientific Research Flanders; M. Kubista, grant agency of the Academy of Sciences, Czech Republic (grants IAA500520809 and AV0250520701); C. T. Wittwer, ARUP Institute for Clinical and Experimental Pathology and Idaho Technology.*

专家意见: *None declared.*

赞助商参与的工作: *The funding organizations played no role in the design of study, choice of enrolled patients, review and interpretation of data, or preparation or approval of manuscript.*

翻译:周伟燕 陈文祥(卫生部临床检验中心)

审校:史红(中华医学会杂志社)

## 参 考 文 献

- [1] Higuchi R, Dollinger G, Walsh PS, Griffith R. Simultaneous amplification and detection of specific DNA sequences. *Biotechnology (N Y)* 1992;10:413-417.
- [2] Higuchi R, Fockler C, Dollinger G, Watson R. Kinetic PCR analysis: real-time monitoring of DNA amplification reactions. *Biotechnology (N Y)* 1993;11:1026-1030.
- [3] Wittwer CT, Herrmann MG, Moss AA, Rasmussen RP. Continuous fluorescence monitoring of rapid cycle DNA amplification. *Biotechniques* 1997;22:130-138.
- [4] Bustin SA. Absolute quantification of mRNA using real-time reverse transcription polymerase chain reaction assays. *J Mol Endocrinol* 2000;25:169-193.
- [5] Kubista M, Andrade JM, Bengtsson M, Forootan A, Jonak J, Lind K, et al. The real-time polymerase chain reaction. *Mol Aspects Med* 2006;27:95-125.
- [6] Bernard PS, Wittwer CT. Real-time PCR technology for cancer diagnostics. *Clin Chem* 2002;48:1178-1185.
- [7] Mackay IM, Arden KE, Nitsche A. Real-time PCR in virology. *Nucleic Acids Res* 2002;30:1292-1305.
- [8] Mackay IM. Real-time PCR in the microbiology laboratory. *Clin Microbiol Infect* 2004;10:190-212.
- [9] Bustin SA, Mueller R. Real-time reverse transcription PCR (qRT-PCR) and its potential use in clinical diagnosis. *Clin Sci (Lond)* 2005;109:365-379.
- [10] Bustin SA, Mueller R. Real-time reverse transcription PCR and the detection of occult disease in colorectal cancer. *Mol Aspects Med* 2006;27:192-223.
- [11] van den Berg RJ, Vaessen N, Endtz HP, Schulin T, van der



- Vorm ER, Kuijper EJ. Evaluation of real-time PCR and conventional diagnostic methods for the detection of *Clostridium difficile*-associated diarrhoea in a prospective multicentre study. *J Med Microbiol* 2007;56:36-42.
- [12] Bustin SA, Nolan T. Pitfalls of quantitative real-time reverse-transcription polymerase chain reaction. *J Biomol Tech* 2004;15:155-166.
- [13] Garson JA, Huggett JF, Bustin SA, Pfaffl MW, Benes V, Vandesompele J, Shipley GL. Unreliable real-time PCR analysis of human endogenous retrovirus-W (HERV-W) RNA expression and DNA copy number in multiple sclerosis. *AIDS Res Hum Retroviruses*. Forthcoming 2009.
- [14] Huang T, Bohlenius H, Eriksson S, Parcy F, Nilsson O. The mRNA of the Arabidopsis gene FT moves from leaf to shoot apex and induces flowering. *Science* 2005;309:1694-1696.
- [15] Bohlenius H, Eriksson S, Parcy F, Nilsson O. Retraction. *Science* 2007;316:367.
- [16] Brazma A, Hingamp P, Quackenbush J, Sherlock G, Spellman P, Stoeckert C, et al. Minimum information about a microarray experiment (MIAME)-toward standards for microarray data. *Nat Genet* 2001;29:365-371.
- [17] Taylor CF, Paton NW, Lilley KS, Binz PA, Julian RK, Jr, Jones AR, et al. The minimum information about a proteomics experiment (MIAPE). *Nat Biotechnol* 2007;25:887-893.
- [18] Field D, Garrity G, Gray T, Morrison N, Selengut J, Sterk P, et al. The minimum information about a genome sequence (MIGS) specification. *Nat Biotechnol* 2008;26:541-547.
- [19] Echeverri CJ, Beachy PA, Baum B, Boutros M, Buchholz F, Chanda SK, et al. Minimizing the risk of reporting false positives in large-scale RNAi screens. *Nat Methods* 2006;3:777-779.
- [20] Haney SA. Increasing the robustness and validity of RNAi screens. *Pharmacogenomics* 2007;8:1037-1049.
- [21] Sansone SA, Fan T, Goodacre R, Griffin JL, Hardy NW, Kaddurah-Daouk R, et al. The metabolomics standards initiative. *Nat Biotechnol* 2007;25:846-848.
- [22] Taylor CF, Field D, Sansone SA, Aerts J, Apweiler R, Ashburner M, et al. Promoting coherent minimum reporting guidelines for biological and biomedical investigations: the MIBBI project. *Nat Biotechnol* 2008;26:889-896.
- [23] Burns MJ, Valdivia H, Harris N. Analysis and interpretation of data from real-time PCR trace detection methods using quantitation of GM soya as a model system. *Anal Bioanal Chem* 2004;378:1616-1623.
- [24] Burns MJ, Nixon GJ, Foy CA, Harris N. Standardisation of data from real-time quantitative PCR methods - evaluation of outliers and comparison of calibration curves. *BMC Biotechnol* 2005;5:31.
- [25] Ellison SL, English CA, Burns MJ, Keer JT. Routes to improving the reliability of low level DNA analysis using real-time PCR. *BMC Biotechnol* 2006;6:33.
- [26] Burns MJ, Valdivia H. Modelling the limit of detection in real-time quantitative PCR. *Eur Food Res Technol* 2008;226:1513-1524.
- [27] Lefever S, Hellems J, Pattyn F, Przybylski DR, Taylor C, Geurts R, et al. RDML: structured language and reporting guidelines for real-time quantitative PCR data. *Nucleic Acids Res* [Epub ahead of print 2009 Feb 17]. Available at: <http://nar.oxfordjournals.org/cgi/content/abstract/gkp056>.
- [28] Wittwer CT, Kusakawa N. Real-time PCR. In: Persing DH, Tenover FC, Versalovic J, Tang JW, Unger ER, Relman DA, White TJ, eds. *Molecular microbiology: diagnostic principles and practice*. Washington: ASM Press; 2004. p 71-84.
- [29] Schmittgen TD, Livak KJ. Analyzing real-time PCR data by the comparative CT method. *Nat Protoc* 2008;3:1101-1108.
- [30] Hellems J, Mortier G, De Paep A, Speleman F, Vandesompele J. qBase relative quantification framework and software for management and automated analysis of real-time quantitative PCR data. *Genome Biol* 2007;8:R19.
- [31] de la Grange P, Dutertre M, Correa M, Auboeuf D. A new advance in alternative splicing databases: from catalogue to detailed analysis of regulation of expression and function of human alternative splicing variants. *BMC Bioinformatics* 2007;8:180.
- [32] Ben-Dov C, Hartmann B, Lundgren J, Valcarcel J. Genome-wide analysis of alternative pre-mRNA splicing. *J Biol Chem* 2008;283:1229-1233.
- [33] Bjornsson HT, Albert TJ, Ladd-Acosta CM, Green RD, Rongione MA, Middle CM, et al. SNP-specific array-based allele-specific expression analysis. *Genome Res* 2008;18:771-779.
- [34] Pattyn F, Robbrecht P, De Paep A, Speleman F, Vandesompele J. RTPrimerDB: the real-time PCR primer and probe database, major update 2006. *Nucleic Acids Res* 2006;34:D684-D688.
- [35] Pattyn F, Speleman F, De Paep A, Vandesompele J. RTPrimerDB: the real-time PCR primer and probe database. *Nucleic Acids Res* 2003;31:122-123.
- [36] Gygi SP, Rochon Y, Franza BR, Aebersold R. Correlation between protein and mRNA abundance in yeast. *Mol Cell Biol* 1999;19:1720-1730.
- [37] Schmidt MW, Houseman A, Ivanov AR, Wolf DA. Comparative proteomic and transcriptomic profiling of the fission yeast *Schizosaccharomyces pombe*. *Mol Syst Biol* 2007;3:79.
- [38] Landi D, Gemignani F, Naccarati A, Pardini B, Vodicka P, Vodickova L, et al. Polymorphisms within micro-RNA-binding sites and risk of sporadic colorectal cancer. *Carcinogenesis* 2008;29:579-584.
- [39] Cronin M, Ghosh K, Sistare F, Quackenbush J, Vilker V, O'Connell C. Universal RNA reference materials for gene expression. *Clin Chem* 2004;50:1464-1471.
- [40] Novoradovskaya N, Whitfield ML, Basehore LS, Novoradovsky A, Pesich R, Usary J, et al. Universal Reference RNA as a standard for microarray experiments. *BMC Genomics* 2004;5:20.
- [41] Gingeras TR. RNA reference materials for gene expression studies. Difficult first steps. *Clin Chem* 2004;50:1289-1290.
- [42] Joseph LJ. RNA reference materials for gene expression studies. RNA metrology: forecast calls for partial clearing. *Clin Chem* 2004;50:1290-1292.
- [43] Bustin SA, Benes V, Nolan T, Pfaffl MW. Quantitative real-time RT-PCR-a perspective. *J Mol Endocrinol* 2005;34:597-601.
- [44] Ramsden SC, Daly S, Geilkenauer WJ, Duncan G, Hermitte F, Marubini E, et al. EQUAL-quant: an international external quality assessment scheme for real-time PCR. *Clin Chem* 2006;52:1584-1591.
- [45] Damond F, Benard A, Ruelle J, Alabi A, Kupfer B, Gomes P, et al. Quality control assessment of human immunodeficiency virus type 2 (HIV-2) viral load quantification assays: results from an international collaboration on HIV-2 infection in 2006. *J Clin Microbiol* 2008;46:2088-2091.
- [46] Mieke P, Ohshima M, Tahmasebpour S, Ren ZP, Ostman A, Ponten F, Botling J. Biobanking of fresh frozen tissue: RNA is stable in nonfixed surgical specimens. *Lab Invest* 2006;86:202-211.
- [47] Morrogh M, Olvera N, Bogomolny F, Borgen PI, King TA. Tissue preparation for laser capture microdissection and RNA extraction from fresh frozen breast tissue. *Biotechniques* 2007;43:41-424, 6 passim.
- [48] Bustin SA. Real-time, fluorescence-based quantitative PCR: a snapshot of current procedures and preferences. *Expert Rev Mol Diagn* 2005;5:493-498.
- [49] Doma MK, Parker R. RNA quality control in eukaryotes. *Cell* 2007;131:660-668.
- [50] Fleige S, Pfaffl MW. RNA integrity and the effect on the real-time qRT-PCR performance. *Mol Aspects Med* 2006;27:126-139.
- [51] Nolan T, Hands RE, Bustin SA. Quantification of mRNA using real-time RT-PCR. *Nat Protoc* 2006;1:1559-1582.
- [52] Nolan T, Hands RE, Ogunkolade BW, Bustin SA. SPUD: a qPCR assay for the detection of inhibitors in nucleic acid preparations. *Anal Biochem* 2006;351:308-310.
- [53] Ferns RB, Garson JA. Development and evaluation of a real-time

- RT-PCR assay for quantification of cell-free human immunodeficiency virus type 2 using a brome mosaic virus internal control. *J Virol Methods* 2006;135:102-108.
- [54] Swango KL, Hudlow WR, Timken MD, Buoncristiani MR. Developmental validation of a multiplex qPCR assay for assessing the quantity and quality of nuclear DNA in forensic samples. *Forensic Sci Int* 2007;170:35-45.
- [55] Garson JA, Grant PR, Ayliffe U, Ferns RB, Tedder RS. Real-time PCR quantitation of hepatitis B virus DNA using automated sample preparation and murine cytomegalovirus internal control. *J Virol Methods* 2005;126:207-213.
- [56] Huggett JF, Novak T, Garson JA, Green C, Morris-Jones SD, Miller RF, Zumla A. Differential susceptibility of PCR reactions to inhibitors; an important and unrecognised phenomenon. *BMC Res Notes* 2008;1:70.
- [57] Ståhlberg A, Aman P, Ridell B, Mostad P, Kubista M. Quantitative real-time PCR method for detection of B-lymphocyte monoclonality by comparison of and immunoglobulin light chain expression. *Clin Chem* 2003;49:51-59.
- [58] Ståhlberg A, Hakansson J, Xian X, Semb H, Kubista M. Properties of the reverse transcription reaction in mRNA quantification. *Clin Chem* 2004;50:509-515.
- [59] Ståhlberg A, Kubista M, Pfaffl M. Comparison of reverse transcriptases in gene expression analysis. *Clin Chem* 2004;50:1678-1680.
- [60] Reiter M, Pfaffl M. Effects of plate position, plate type and sealing systems on real-time PCR results. *Biotechnol Biotechnol Equip* 2008;22:824-828.
- [61] Ririe KM, Rasmussen RP, Wittwer CT. Product differentiation by analysis of DNA melting curves during the polymerase chain reaction. *Anal Biochem* 1997;245:154-160.
- [62] Pfaffl MW. A new mathematical model for relative quantification in real-time RT-PCR. *Nucleic Acids Res* 2001;29:E45.
- [63] Dube S, Qin J, Ramakrishnan R. Mathematical analysis of copy number variation in a DNA sample using digital PCR on a nanofluidic device. *PLoS ONE* 2008;3:e2876.
- [64] Vogelstein B, Kinzler KW. Digital PCR. *Proc Natl Acad Sci U S A* 1999;96:9236-9241.
- [65] Elnifro EM, Ashshi AM, Cooper RJ, Klapper PE. Multiplex PCR: optimization and application in diagnostic virology. *Clin Microbiol Rev* 2000;13:559-570.
- [66] Wittwer CT, Herrmann MG, Gundry CN, Elenitoba-Johnson KS. Real-time multiplex PCR assays. *Methods* 2001;25:430-442.
- [67] Elenitoba-Johnson KS, Bohling SD, Wittwer CT, King TC. Multiplex PCR by multicolor fluorimetry and fluorescence melting curve analysis. *Nat Med* 2001;7:249-253.
- [68] Karlen Y, McNair A, Perseguers S, Mazza C, Mermod N. Statistical significance of quantitative PCR. *BMC Bioinformatics* 2007;8:131.
- [69] Huggett J, Dheda K, Bustin S, Zumla A. Real-time RT-PCR normalisation; strategies and considerations. *Genes Immun* 2005;6:279-284.
- [70] Gutierrez L, Mauriat M, Guenin S, Pelloux J, Lefebvre JF, Louvet R, et al. The lack of a systematic validation of reference genes: a serious pitfall undervalued in reverse transcription-polymerase chain reaction (RT-PCR) analysis in plants. *Plant Biotechnol J* 2008;6:609-618.
- [71] Vandesompele J, De Preter K, Pattyn F, Poppe B, Van Roy N, De Paep A, Speleman F. Accurate normalization of real-time quantitative RT-PCR data by geometric averaging of multiple internal control genes. *Genome Biol* 2002;3:RESEARCH0034.
- [72] Pfaffl MW, Horgan GW, Dempfle L. Relative expression software tool (REST) for group-wise comparison and statistical analysis of relative expression results in real-time PCR. *Nucleic Acids Res* 2002;30:e36.
- [73] Andersen CL, Jensen JL, Orntoft TF. Normalization of real-time quantitative reverse transcription-PCR data: a model-based variance estimation approach to identify genes suited for normalization, applied to bladder and colon cancer data sets. *Cancer Res* 2004;64:5245-5250.
- [74] Willems E, Leyns L, Vandesompele J. Standardization of real-time PCR gene expression data from independent biological replicates. *Anal Biochem* 2008;379:127-129.
- [75] Apfalter P, Reischl U, Hammerschlag MR. In-house nucleic acid amplification assays in research: How much quality control is needed before one can rely upon the results? . *J Clin Microbiol* 2005;43:5835-5841.
- [76] Ciabatti I, Froio A, Gatto F, Amaddeo D, Marchesi U. In-house validation and quality control of real-time PCR methods for GMO detection: a practical approach. *Dev Biol (Basel)* 2006;126:79-86discussion 324-5.
- [77] de Cremoux P, Bieche I, Tran-Perennou C, Vignaud S, Boudou E, Asselain B, et al. Inter-laboratory quality control for hormone-dependent gene expression in human breast tumors using real-time reverse transcription-polymerase chain reaction. *Endocrine Relat Cancer* 2004;11:489-495.
- [78] de Vries TJ, Fourkour A, Punt CJ, van de Locht LT, Wobbes T, van den Bosch S, et al. Reproducibility of detection of tyrosinase and MART-1 transcripts in the peripheral blood of melanoma patients; a quality control study using real-time quantitative RT-PCR. *Br J Cancer* 1999;80:883-891.
- [79] Gabert J, Beillard E, van der Velden VH, Bi W, Grimwade D, Pallisgaard N, et al. Standardization and quality control studies of 'real-time' quantitative reverse transcriptase polymerase chain reaction of fusion gene transcripts for residual disease detection in leukemia - a Europe Against Cancer program. *Leukemia* 2003;17:2318-2357.
- [80] Lemmer K, Donoso Mantke O, Bae HG, Groen J, Drosten C, Niedrig M. External quality control assessment in PCR diagnostics of dengue virus infections. *J Clin Virol* 2004;30:291-296.
- [81] Marubini E, Verderio P, Raggi CC, Pazzagli M, Orlando C. Statistical diagnostics emerging from external quality control of real-time PCR. *Int J Biol Markers* 2004;19:141-146.
- [82] Raggi CC, Verderio P, Pazzagli M, Marubini E, Simi L, Pinzani P, et al. An Italian program of external quality control for quantitative assays based on real-time PCR with Taq-Man probes. *Clin Chem Lab Med* 2005;43:542-548.
- [83] Sjöholm MI, Dillner J, Carlson J. Assessing quality and functionality of DNA from fresh and archival dried blood spots and recommendations for quality control guidelines. *Clin Chem* 2007;53:1401-1407.
- [84] Wang X, Jia S, Meyer L, Xiang B, Chen LY, Jiang N, et al. Comprehensive quality control utilizing the prehybridization third-dye image leads to accurate gene expression measurements by cDNA microarrays. *BMC Bioinformatics* 2006;7:378.
- [85] Winters MA, Tan LB, Katzenstein DA, Merigan TC. Biological variation and quality control of plasma human immunodeficiency virus type 1 RNA quantitation by reverse transcriptase polymerase chain reaction. *J Clin Microbiol* 1993;31:2960-2966.
- [86] van der Velden VH, Panzer-Grumayer ER, Cazzaniga G, Flohr T, Sutton R, Schrauder A, et al. Optimization of PCR-based minimal residual disease diagnostics for childhood acute lymphoblastic leukemia in a multi-center setting. *Leukemia* 2007;21:706-713.
