# Supplementary material for: The MIQE Guidelines: Minimum Information for Publication of Quantitative Real-Time PCR Experiments
Source: Oxford University Press journal article supplement (doi:10.1373/clinchem.2008.112797), 2009-02-27
Supplement: miqe-japanese-final.pdf [file miqe-japanese-final.pdf]

## MIQE ガイドライン: 定量的リアルタイム PCR 実験の公表に必要な最低限の情報

Stephen A. Bustin,<sup>1\*</sup> Vladimir Benes,<sup>2</sup> Jeremy A. Garson,<sup>3,4</sup> Jan Hellemans,<sup>5</sup> Jim Huggett,<sup>6</sup>  
Mikael Kubista,<sup>7,8</sup> Reinhold Mueller,<sup>9</sup> Tania Nolan,<sup>10</sup> Michael W. Pfaffl,<sup>11</sup> Gregory L. Shipley,<sup>12</sup>  
Jo Vandesompele,<sup>5</sup> and Carl T. Wittwer<sup>13,14</sup>

**背景:** 現在、定量的リアルタイムPCR (qPCR) 実験の最適な実施方法および解釈方法について、統一された基準がない。問題は深刻化しており、多くの文献では実験の詳細が不十分で、結果のクオリティの批評や実験の再現を妨げている。

**内容:** 定量的リアルタイムPCR実験の発表に必要な最低限の情報MIQE (Minimum Information for Publication of Quantitative Real-Time PCR Experiments)ガイドラインは、科学論文の完全性を確保し、実験室間の一貫性を向上させ、実験の透明性を改善する助けとするため、結果の信頼性に焦点をあてたものとしている。MIQEは、qPCR実験を評価するために必要な最低限の情報を示した一連のガイドラインである。本内容は、発行者への原稿の初回提出時に添付すべきチェックリストである。関係するすべての実験条件およびアッセイの特徴を提供することによって、査読者は用いたプロトコールの妥当性を評価できるようになる。また他の研究者が結果を再現できるようにするためには、すべての試薬、塩基配列、解析法を完全公開することが必要である。MIQEの詳細は概略形式、またはオンライン補足資料として提示する必要がある。

**要約:** MIQEガイドラインに従うことによって、実験のよりよい慣例が推進され、qPCRの結果をより確実かつ明確に解釈することが可能となる。

© 2009 American Association for Clinical Chemistry

蛍光測定に基づいた定量的リアルタイムPCR (qPCR)<sup>15</sup> (1-3) は多種多様なソースから得られた広範なサンプル中の微量な核酸を検出、および測定する性能を有するため、分子診断、ライフサイエンス、農業、医学分野においてひときわ優れた実現技術のひとつとなっている(4,5)。その概念と実施方法はきわめて簡単で、同一のアッセイにおけるスピード、感度、特異性を兼ね備えていることもあり、核酸定量の基準となっている。qPCRは研究用ツールとしての使用に加えて、微生物定量、遺伝子発現定量、遺伝子組み換え食品中の組み換え遺伝子の同定、癌再発のリスク評価、法医学利用のアプリケーションなどの多くの診断アプリケーションが開発されている(6-11)。

この注目度の高さはqPCRデータを報告する膨大な文献の数に反映されているが、そうした文献で使用されている試薬、プロトコール、解析法、報告様式はさまざまである。つまり、最良のqPCR実験の実施方法に関するコンセンサスが明らかに欠如しているため、独立した判断基準としてのqPCRの位置付けを妨げる数々の重大な欠点が永続するという悪影響が生じている(12)。アッセイパフォーマンスに影響を及ぼす技術的欠陥は以下のとおりである。(a) サンプルの保管・調製方法が不適切、核酸品質が不十分で結果がきわめて変動しやすい。(b) 逆転写プライマーならびにPCR用のプライマ

<sup>1</sup> Centre for Academic Surgery, Institute of Cell and Molecular Science, Barts and the London School of Medicine and Dentistry, London, UK; <sup>2</sup> Genomics Core Facility, EMBL Heidelberg, Heidelberg, Germany; <sup>3</sup> Centre for Virology, Department of Infection, University College London, London, UK; <sup>4</sup> Department of Virology, UCL Hospitals NHS Foundation Trust, London, UK; <sup>5</sup> Center for Medical Genetics, Ghent University Hospital, Ghent, Belgium; <sup>6</sup> Centre for Infectious Diseases, University College London, London, UK; <sup>7</sup> TATAA Biocenter, Göteborg, Sweden; <sup>8</sup> Institute of Biotechnology AS CR, Prague, Czech Republic; <sup>9</sup> Sequenom, San Diego, California, USA; <sup>10</sup> Sigma-Aldrich, Haverhill, UK; <sup>11</sup> Physiology Weihenstephan, Technical University Munich, Freising, Germany; <sup>12</sup> Quantitative Genomics Core Laboratory, Department of Integrative Biology and Pharmacology, University of Texas Health Science Center, Houston, Texas, USA; <sup>13</sup> Department of Pathology, University of Utah, Salt Lake City, Utah, USA; <sup>14</sup> ARUP Institute for Clinical and Experimental Pathology, Salt Lake City, Utah, USA.

\* Address correspondence to this author at: 3rd Floor Alexandra Wing, The Royal London Hospital, London E1 1BB, UK. Fax 44-(0)20-7377 7283; e-mail s.a.bustin@qmul.ac.uk.

Received October 20, 2008; accepted January 27, 2009.

Previously published online at DOI: 10.1373/clinchem.2008.112797

<sup>15</sup> Nonstandard abbreviations: qPCR, quantitative real-time PCR; MIQE, Minimum Information for Publication of Quantitative Real-Time PCR Experiments; RTqPCR, reverse transcription-qPCR; FRET, fluorescence resonance energy transfer; C<sub>q</sub>, quantification cycle, previously known as the threshold cycle (C<sub>t</sub>), crossing point (C<sub>p</sub>), or take-off point (TOP); RDML, Real-Time PCR Data Markup Language; LOD, limit of detection; NTC, no-template control.

一、およびプローブの選択肢が貧弱なため、健全とはいえないアッセイパフォーマンスを引き起こしている。(c)データ解析および統計解析が不適切であり、きわめて誤解しやすい結果を生み出している。その結果、不十分で矛盾する結果を報告する多数の文献によって、科学論文の品質が落ちている現実の危険性がある(13)。*Science*の「Breakthrough of the Year 2005」の発表(14)、および撤回(15)などは不穏な兆候そのものである。qPCRを用いたほとんどの研究報告で見受けられる情報不足によって問題は悪化しており、多くの文献は詳細な実験データを十分に示していないため、提示されている結果のクオリティに関する批評や、実験の再現が不可能になっている。特にサンプル収集および取り扱い、RNAの品質および完全性、逆転写の詳細、PCR効率、解析パラメータは省略されることが多く、またサンプルのノーマライゼーションは十分に正当な理由もなく、習慣的に1つのリファレンス遺伝子で行われている。

本稿の目的は、論文の著者、査読者、編集者に、表1に示す最低限の情報の内訳を提示することである。これらの情報はqPCR実験の重要性、正確性、適切な解釈、再現性を確保するために必ず報告しなければならない。MIQE(定量的リアルタイムPCR実験の発表に必要な最低限の情報、マイキー(mykee)と発音する)は、MIBBI (Minimum Information for Biological and Biomedical Investigations, <http://www.mibbi.org>) (22)の傘下で整備された構想である、DNAマイクロアレイ解析(16)、プロテオミクス実験(17)、ゲノムシーケンスの仕様(18)や、現在議論されているRNAi研究(19, 20)、代謝学(21)のガイドラインを元にモデル化されている。データの共有を可能にするための共通報告言語の強制的な包括については、今後のガイドライン更新でそうした推奨事項が盛り込まれることは予想されるが、今のところ提案されていない。むしろ、これらのガイドラインは科学論文の完全性を確保する助けとして、研究室間の整合性を向上させ、実験の透明性を改善できるよう、結果の信頼性をターゲットとしたものとしている。これらのガイドラインは、qPCRの標準化の問題を詳細に取り扱っている最新の文献と併せて読む必要がある。

## 1. 専門用語

理解性を確保するために、いくつかの用語を標準化する必要がある：

- 1.1 我々は、定量的リアルタイムPCRにはqPCRという略語を用いること、および逆

転写-定量的リアルタイムPCRにはRT-qPCRという略語を用いることを提案する。qPCRにRT-PCRという略語を用いると、通常の(従来の)逆転写-PCRに対する使用と混乱する。

- 1.2 ノーマライゼーションに用いられる遺伝子は、reference genes(リファレンス遺伝子)と呼ばれ、housekeeping genes(ハウスキーピング遺伝子)は用いない。
- 1.3 TaqManプローブは、Hydrolysis Probe(加水分解プローブ)と呼称する。
- 1.4 FRETプローブ(fluorescence resonance energy transfer probe; 蛍光共鳴エネルギー移動プローブ)という用語は、2種類の蛍光色素分子の電子励起状態で起きる相互作用による、発光/消光の一般的機序を指す。LightCycler®型プローブはdual hybridization probe(デュアルハイブリダイゼーションプローブ)と呼称する。
- 1.5 *Oxford English Dictionary*は「定量」の用語として「quantification」のみを記載し、「quantitation」は記載していない。したがって、前者が適切な用語である。
- 1.6 定量に用いられるfractional PCRサイクルを説明する専門用語は一貫しておらず、文献では現在、閾値サイクル(threshold cycle :  $C_t$ )、クロッシングポイント(crossing point :  $C_p$ )、テイクオフポイント(take-off point : TOP)が用いられている。これらの用語はすべてリアルタイムPCR機器から得られた同じ値を指しており、科学的正確性や明確性ではなく、製品の差別化のためリアルタイムPCR機器の製造業者が造語したものである。MIQEではRDML (Real-Time PCR Data Markup Language)データの標準(<http://www.rdml.org>)に従って、定量サイクル(quantification cycle :  $C_q$ )の使用を提案する(27)。

## 2. 概念上の考慮事項

ガイドラインを説明して正当性を示すには、qPCR実験を巡る多くの重要な問題の見直しが必要である。

- 2.1 Analytical sensitivity(解析感度)は、アッセイで正確に測定できるサンプル中の最小コピー数を指すが、Clinical sensitivity(臨床感度)は、任意の疾患を有する個体群に対し、アッセイがある条件下で陽性と特定する個体の割合である。一般に、感度は検出限界(Limit of detection; LOD)として表され、特定の解析手順により妥当な確実性(95%の確

率が通常用いられる)をもって検出できる濃度である。理論上可能な最も感度の高いLODはPCR 1回あたり3コピーであり(28)、ポワソン分布を前提とすると、PCRで1コピー以上が含まれ、単一コピーが検出される確率が95%ということになる。実験手順には一般にサンプル処理ステップ(すなわち抽出)、そして必要な場合逆転写が含まれる。これらのステップの容量変化および効率を考慮する場合、理論的に可能な最も感度の高いLODは組織1ngあたりのコピー数など、その実験に関連する単位で表される。例えば、理論的に可能なLOD未満の実験結果は報告すべきではない。当然ながら「0」という結果に意味はなく、誤解を与えることにもなる。テンプレート濃度がゼロであると $C_q$ 値が定義されないためqPCR解析におけるLOD推定は $C_q$ 値の対数的な性質によって複雑になる。qPCRにおけるLODの適切な決定およびモデル化が、継続研究の焦点である(26)。

- 2.2 Analytical specificity (解析特異性) とは、qPCRアッセイによってサンプルに存在する他の非特異的ターゲットではなく適切なターゲット配列が検出されることを指す。Diagnostics specificity (診断特異性) は、そのアッセイが任意の条件を持たない個体を陰性と特定することのできる割合をさす。
- 2.3 Accuracy (精度) とは、実験で測定された濃度と実際の濃度の差異を指しており、倍率変化または推定コピー数で表される。
- 2.4 Repetability (繰り返し精度) (短期精度またはアッセイ内変動) は、同じサンプルを同じアッセイ法で繰り返し解析することによるアッセイの精度および安定性を指す。 $C_q$ の場合にはSDとして表されることもある。また、コピー数もしくは濃度変動の場合、SDまたはCVが用いられることもある。しかしCVは $C_q$ と共に用いるべきではない(29)。
- 2.5 Reproducibility (再現性) (長期精度またはアッセイ間変動) は、異なるランや異なる研究室間の結果の変動性を指し、一般的にコピー数や濃度のSDまたはCVで表される。異なるランから収集した $C_q$ 値はラン毎に内在するぶれの影響を受けやすい(30)ため、各ランの $C_q$ 値の変動についての報告は適切ではない。

文献にターゲット遺伝子のmRNA濃度を記載する場合、ターゲットが何であるかを正確に明示すべきである。大部分のヒト遺伝子および他の多細胞生物の転写産物の多くはオルタナティブにスプライシングされており(31, 32)、こ

れらのスプライスバリエーションは異なる組織や発生ステージで報告されているスプライシングパターンの変異によって、様々なタンパク質アイソフォームを指定している。その結果、単一エクソンを用いたRT-qPCRアッセイではスプライスバリエーションが数多く検出される可能性があり、その一方でイントロンをまたぐように設計したプライマーは選択性が高く、一部のスプライスバリエーションを見落としてしまう可能性がある。また最近、発現においてアレル不均衡を示す常染色体上の非インプリント遺伝子が報告された(33)。これらの結果をまとめるとmRNAの1つないし最大でも2つのエクソンのみを標的とするRT-qPCRアッセイの使用は、もはや特定の遺伝子の発現量を説明するには十分ではないことが示唆される。このため、プライマーの配列情報は転写産物、および一塩基多型のデータベースに記録されている既知のスプライスバリエーション、一塩基多型の位置に関する特異性の評価も併せて提供しなければならない。RTprimerDBデータベースから選択されたプライマーセットについては(34, 35)、関連情報がすべて掲載されているRTprimerDBのホームページ(<http://www.rtprimerdb.org>)を閲覧することにより簡単にこれを実行できる。営利目的のアッセイについては、ロット情報やサービス提供者の実験検証基準についての情報が必要である。検証を実施していない営利目的のアッセイ、およびin silicoでのみ検証を実施しているアッセイについては、結果の論文報告を断固として阻止すべきである。

mRNAの存在を検出しても、そのmRNAがタンパク質に翻訳されるかどうか、また実際に機能的タンパク質に翻訳されているのかという情報は与えないことに留意しておかななくてはならない。

免疫組織化学検査、ウェスタンブロッティング、その他のタンパク質定量法は、細胞mRNAの定量データを常に裏付けるわけではない。現在では、mRNA濃度とタンパク質濃度のデータがしばしば一致しないことが十分立証されており(36)、特に、多機能タンパク質複合体の一部となるタンパク質をコードするmRNAにはこれが当てはまる(37)。最後に、特異的なマイクロRNAの存在と機能に関する情報は、mRNA種を定量できることと同様に遺伝子発現の理解にも重要であることが明らかになりつつある(38)。

大部分のRNA定量データは絶対量ではなく相対量であることを認識しておく必要もある。このため、標準化に用いられるリファレンス遺伝子や材料が重要であり、RT-qPCR実験の妥当性の評価では、常に相対量のリファレンス

**Table 1. MIQE checklist for authors, reviewers, and editors.<sup>a</sup>**

| Item to check                                                                     | Importance     | Item to check                                                            | Importance     |
|-----------------------------------------------------------------------------------|----------------|--------------------------------------------------------------------------|----------------|
| Experimental design                                                               |                | qPCR oligonucleotides                                                    |                |
| Definition of experimental and control groups                                     | E              | Primer sequences                                                         | E              |
| Number within each group                                                          | E              | RTPrimerDB identification number                                         | D              |
| Assay carried out by the core or investigator's laboratory?                       | D              | Probe sequences                                                          | D <sup>d</sup> |
| Acknowledgment of authors' contributions                                          | D              | Location and identity of any modifications                               | E              |
| Sample                                                                            |                | Manufacturer of oligonucleotides                                         | D              |
| Description                                                                       | E              | Purification method                                                      | D              |
| Volume/mass of sample processed                                                   | D              | qPCR protocol                                                            |                |
| Microdissection or macrodissection                                                | E              | Complete reaction conditions                                             | E              |
| Processing procedure                                                              | E              | Reaction volume and amount of cDNA/DNA                                   | E              |
| If frozen, how and how quickly?                                                   | E              | Primer, (probe), Mg <sup>2+</sup> , and dNTP concentrations              | E              |
| If fixed, with what and how quickly?                                              | E              | Polymerase identity and concentration                                    | E              |
| Sample storage conditions and duration (especially for FFPE <sup>b</sup> samples) | E              | Buffer/kit identity and manufacturer                                     | E              |
| Nucleic acid extraction                                                           |                | Exact chemical composition of the buffer                                 | D              |
| Procedure and/or instrumentation                                                  | E              | Additives (SYBR Green I, DMSO, and so forth)                             | E              |
| Name of kit and details of any modifications                                      | E              | Manufacturer of plates/tubes and catalog number                          | D              |
| Source of additional reagents used                                                | D              | Complete thermocycling parameters                                        | E              |
| Details of DNase or RNase treatment                                               | E              | Reaction setup (manual/robotic)                                          | D              |
| Contamination assessment (DNA or RNA)                                             | E              | Manufacturer of qPCR instrument                                          | E              |
| Nucleic acid quantification                                                       | E              | qPCR validation                                                          |                |
| Instrument and method                                                             | E              | Evidence of optimization (from gradients)                                | D              |
| Purity (A <sub>260</sub> /A <sub>280</sub> )                                      | D              | Specificity (gel, sequence, melt, or digest)                             | E              |
| Yield                                                                             | D              | For SYBR Green I, C <sub>q</sub> of the NTC                              | E              |
| RNA integrity: method/instrument                                                  | E              | Calibration curves with slope and y intercept                            | E              |
| RIN/RQI or C <sub>q</sub> of 3' and 5' transcripts                                | E              | PCR efficiency calculated from slope                                     | E              |
| Electrophoresis traces                                                            | D              | CIs for PCR efficiency or SE                                             | D              |
| Inhibition testing (C <sub>q</sub> dilutions, spike, or other)                    | E              | r <sup>2</sup> of calibration curve                                      | E              |
| Reverse transcription                                                             |                | Linear dynamic range                                                     | E              |
| Complete reaction conditions                                                      | E              | C <sub>q</sub> variation at LOD                                          | E              |
| Amount of RNA and reaction volume                                                 | E              | CIs throughout range                                                     | D              |
| Priming oligonucleotide (if using GSP) and concentration                          | E              | Evidence for LOD                                                         | E              |
| Reverse transcriptase and concentration                                           | E              | If multiplex, efficiency and LOD of each assay                           | E              |
| Temperature and time                                                              | E              | Data analysis                                                            |                |
| Manufacturer of reagents and catalogue numbers                                    | D              | qPCR analysis program (source, version)                                  | E              |
| C <sub>q</sub> s with and without reverse transcription                           | D <sup>c</sup> | Method of C <sub>q</sub> determination                                   | E              |
| Storage conditions of cDNA                                                        | D              | Outlier identification and disposition                                   | E              |
| qPCR target information                                                           |                | Results for NTCs                                                         | E              |
| Gene symbol                                                                       | E              | Justification of number and choice of reference genes                    | E              |
| Sequence accession number                                                         | E              | Description of normalization method                                      | E              |
| Location of amplicon                                                              | D              | Number and concordance of biological replicates                          | D              |
| Amplicon length                                                                   | E              | Number and stage (reverse transcription or qPCR) of technical replicates | E              |
| In silico specificity screen (BLAST, and so on)                                   | E              | Repeatability (intraassay variation)                                     | E              |
| Pseudogenes, retropseudogenes, or other homologs?                                 | D              | Reproducibility (interassay variation, CV)                               | D              |
| Sequence alignment                                                                | D              | Power analysis                                                           | D              |
| Secondary structure analysis of amplicon                                          | D              | Statistical methods for results significance                             | E              |
| Location of each primer by exon or intron (if applicable)                         | E              | Software (source, version)                                               | E              |
| What splice variants are targeted?                                                | E              | C <sub>q</sub> or raw data submission with RDML                          | D              |

<sup>a</sup> All essential information (E) must be submitted with the manuscript. Desirable information (D) should be submitted if available. If primers are from RTPrimerDB, information on qPCR target, oligonucleotides, protocols, and validation is available from that source.

<sup>b</sup> FFPE, formalin-fixed, paraffin-embedded; RIN, RNA integrity number; RQI, RNA quality indicator; GSP, gene-specific priming; dNTP, deoxynucleoside triphosphate.

<sup>c</sup> Assessing the absence of DNA with a no–reverse transcription assay is essential when first extracting RNA. Once the sample has been validated as DNA free, inclusion of a no–reverse transcription control is desirable but no longer essential.

<sup>d</sup> Disclosure of the probe sequence is highly desirable and strongly encouraged; however, because not all vendors of commercial predesigned assays provide this information, it cannot be an essential requirement. Use of such assays is discouraged.

の適切性も考慮しなければならない。したがって、ユニバーサルなリファレンスDNAおよびRNAキャリブレーション材料の開発は、きわめて有用であるが(39, 40)、万能薬とはならないであろう(41, 42)。

RT-qPCR実験で得られ、報告されている発現量の相違の多くは、単に実験プロトコルのばらつきによるものではなく、データに独自の推測を行う多様なデータ処理アルゴリズムにより適用された修正が原因である。よくqPCRは何かに対する基準やゴールドスタンダードとしてもはやされるが、実際にはこの「スタンダード」は変わりやすいものであり、結果を報告するにはデータの解析や解釈を相当に高度化する必要がある(43)。

### 3. 研究への応用vs.診断への応用

qPCR技術の応用はおおまかに、研究への応用と診断への応用に分けられる。研究応用は通常、多種多様なサンプルを低めのスループット数で広範囲なターゲットを解析対象とする。検討する必要のある主なパラメータはアッセイの解析感度と特異性に関係し、そのアッセイがどれくらいのコピー数から検出できるのか、そしてno-template control (NTC)が確実に陰性であるのかということを示している。

対照的に、診断応用は通常、限られた数のターゲットを分析するが、ごく少数のサンプル種を対象としたハイスループットのプロトコルを必要とする。研究応用に適用される全ての検討事項が診断アッセイにも当てはまるが、臨床的診断アッセイには考慮すべき要件が数多く追加される。内容としては解析感度および特異性に関する情報が挙げられるが、この場合、ターゲットが存在する際にどの程度の頻度で陽性結果を返すか、そしてターゲットが存在しない場合に陰性と返す頻度を指している。さらに、研究室内部および研究室間の確度と精度は、外部QCプログラムにより監視されることが多い。そのほかの臨床検査室では報告可能な結果の作成、サンプルに反復測定されたかどうか、偽陽性/偽陰性データの決定に関するデータ、同じまたは異なる技術を用いる多くの研究室から得られた結果の類似性に対する基準が必要となる。これまで、研究室間比較はわずか2件しか行われておらず、どちらの研究でもqPCR診断アッセイの標準化の必要性を強調したものであった(44, 45)。研究室間比較はもう1件、European Framework 7 project: SPIDIA (Standardisation and Improvement of Generic Pre-analytical Tools and Procedures for In-Vitro Diagnostics; <http://www.spidia.eu>)において計画されている。

### 4. サンプルの取得、取り扱い、調製

サンプルの取得は実験変動性を生む最初の原因であり、特に実験がRNAをターゲットとしている場合にその傾向が強い。これは、mRNAプロファイルがサンプル収集方法や処理方法により容易に変化するためである。新鮮組織は氷上で保存可能であり、RNAの品質や濃度に対して大きな影響は認められないことが示唆されていることがあるが(46)、この推定は一部のmRNAや組織には当てはまる可能性があるものの、一般に適用できるものではないと考えられるため、慎重になるに越したことはない。したがって、どここの組織サンプルを採取したのか、直ちに処理を行ったのかどうかについて、詳細に報告することが重要である。そのサンプルが直ちに処理されていなかった場合、どのように保存されたか、どのような条件下でどれくらいの期間保存されたかを報告する必要がある。

サンプルの簡単な説明も不可欠である。例えば、腫瘍生検の顕微鏡検査では生検サンプルの何パーセントが腫瘍細胞なのかが明らかになるため、この情報を報告する必要がある。

核酸抽出は第2の重要なステップである。抽出効率は、十分なホモジナイゼーション、サンプルの種類(例; 生体組織か対数増殖期の培養細胞か)、ターゲット密度、生理学的状態(例; 健常、癌性、壊死性)、遺伝的複雑性、バイオマス処理量に依存する。このため、核酸抽出法の詳細を提供すること、および核酸濃度の測定およびその品質の評価に用いられた方法を説明する必要がある。このような詳細情報は、組織調製手順の違いがRNAの収量と品質の両者に大きな影響を及ぼす新鮮凍結レーザーマイクロダイセクション生検サンプルから抽出されたRNAで特に重要である(47)。

### 5. 核酸のQC

#### 5.1 RNAサンプル

異なるサンプルを比較する場合、ほぼ同量のRNAを用いることが望ましく、抽出サンプルのRNA定量は重要である。しかし、吸光度測定(Thermo Scientific社のNanoDrop)、マイクロ流体分析(Agilent Technologies社のBioanalyzer、Bio-Rad Laboratories社のExperion)、キャピラリーゲル電気泳動(Qiagen社のQIAxcel)、蛍光色素検出(Ambion/Applied Biosystems社のRiboGreen)など、一般的に用いられている定量手順はいくつもある。これらの手法は異なる結果を出すため、異なる手法で得られたデータの比較は賢明ではない(48)。RNA定量では蛍光RNA結合色素(例; RiboGreen)が推奨される方法で、これらの

色素はターゲット濃度が低い場合の検出に最適である。いずれにしても、すべてのサンプルを単一の手法で測定し、報告することが望ましい。

ゲノムDNA汚染の程度を検査および報告し、同時に、許容されるそうした汚染の量に関する閾値のカットオフ基準を記録することも重要である。そのRNAサンプルをDNaseで処理したかどうか(使用したDNaseの種類および反応条件など)を報告すること、そして陽性コントロールと非逆転写コントロールの各核酸ターゲットについてC<sub>t</sub>値の比較を行い、結果を報告することが不可欠である。

また、RNAテンプレートの品質評価を記録することも不可欠である。この要件が適用されない唯一の状況は、抽出されたtotal RNA量がきわめて少なく、品質評価ができない場合である。この状況は、RNAを単一細胞、血漿、他の無細胞体液、一部のレーザーキャプチャーサンプル、清澄化組織培養培地から抽出した際に生じる。また、抽出およびRT-qPCRステップが単一のチューブによる連続実験として実施された場合にも当てはまる。報告すべき重要な情報には、RNA量、完全性、逆転写やPCRを阻害する物質の非存在に関する情報も含まれる。RNAは環境刺激物質に反応したmRNAの自然制御によってin vivoで顕著に分解されることを憶えておくとよいだろう(49)。このRNA分解の原因は研究者のコントロールの範囲を超えており、そのため高品質RNAサンプルでさえ、個々のmRNAの分解に差異を示す可能性がある。

A<sub>260</sub>/A<sub>280</sub>比は中性pHのバッファー中で測定しなければならないが、核酸が定量解析に用いられる予定がある場合、特に細胞内mRNA濃度のわずかな差異(10倍未満)を測定することが目的である場合はそれでも十分ではない。吸光度比は、DNAや残留フェノールの存在により比が変化するため、RNA純度の目安程度である。代わりに、少なくともゲル電気泳動によるエビデンス、できればマイクロ流体工学に基づくrRNA分析(50)またはリファレンス遺伝子、ターゲット遺伝子の3'/5' (51)の結果も提供する必要がある。RNA integrity numberまたはRNA quality indicator numberの計算にBioanalyzer/Experionシステムを使用する利点は、これらの測定値がそのRNAサンプルの全体的な状態について定量情報を提供することにある。しかし、これらの数値がrRNAの品質に関係すること、および品質の絶対的尺度にはなり得ないことに留意することが重要である。3'/5' integrity assayの使用には両アッセイのPCR効率が事実上同一であり、阻害の差による影響を受けないことが必要である。このアッセイは信頼性の高い結果を生み出すのに十

分なRNA品質を正確に示す限界基準の確立も必要としている。理想的には、イントロンを除いた“完全性を示すためのリファレンスジーン”を標的とすべきであり、3'/5'の比が約0.2~5となることが望ましい。RNAの完全性を評価するための普遍的で、費用効果の高い、簡単なプロトコールを作成するためには、さらなる研究が必要であることは明らかである。

逆転写活性やPCRの阻害は、サンプルの希釈、またはSPUD (52, 53)などの汎用阻害アッセイの使用により確認する必要がある。もしRNAサンプルが部分的に分解していることが示されたら、その情報を報告することが非常に重要である。少量の転写産物の検出感度が低下し、転写産物分解の相対的差異がターゲット比の不正確さを引き起こす可能性があるためである。

### 5.2. DNAサンプル

一般に、DNAでは分解の問題はRNAに比べると非常に少ない。しかし、法医学的アプリケーションに対してはDNA分解の程度を評価できることは重要である。すなわち、犯罪現場や集団災害、行方不明事件の現場のような厳しい環境条件がDNAの化学構造を分解した可能性がある場合である。qPCRアッセイのアンプリコンサイズが小さいことはアッセイ関連の問題を最小限に抑制するのに役立っているが、DNA品質の定量測定値を提供する手法が開発されており(54)、そうした特殊な用途についても考慮する必要がある。

阻害の可能性はより一般に適用される変数であり、論文では対処しなければならない。DNAと共に精製される阻害物質が病原体検出やその定量などの結果を損なわないことを確認することが重要である(55)。陽性コントロールによるサンプルのスパイク(52)などのアプローチ法を用いて阻害を検出することは可能であるが、核酸抽出中に同時精製される物質による阻害に対するさまざまなPCR反応の感受性は等しくないと考えられる(56, 57)。このため、核酸の希釈液を日常的に利用して、認められたC<sub>t</sub>またはコピー数の減少が予測された結果と一致することを示すと共に、これらのデータを報告することが望ましい。

### 6. 逆転写

逆転写反応はRT-qPCRアッセイに多大な変動性を導入する(58, 59)。このため、RNAをcDNAに変換するために用いたプロトコールおよび試薬に関する詳細な説明を提示することが不可欠である。その記録には、逆転写されたRNAの量、プライミング方法、酵素の種類、温

度、容量、逆転写反応の時間が含まれていなければならない。逆転写反応は2反復または3反復行い、すべてのサンプルのtotal RNA濃度が同量であることが推奨される(58)。

## 7. qPCR

qPCRアッセイには、以下の情報を提供しなければならない。各ターゲット遺伝子およびリファレンス遺伝子のデータベースアクセス番号、各プライマーおよびプローブがどのエクソンに位置するか、各オリゴヌクレオチドの配列と濃度や、その配列の同一性、位置、結合している蛍光色素や修飾されている塩基などである。このほかにも、ポリメラーゼの濃度とアイデンティティー、反応毎のテンプレート(DNAまたはcDNA)量、 $Mg^{2+}$ 濃度、バッファーの正確な化学組成(塩、pH、添加物)、反応容量も必要である。さらに、用いられる機器を特定し、PCRサイクル条件をすべて記録しなければならない。使用する消耗品はサーマルサイクリングに影響を及ぼすため、単一チューブ、ストリップ、プレートの使用、およびその製造業者を特定する必要がある。用いられるプラスチック器具の透明度、例えば白色か透明かという情報も重要である。これは、プラスチック類によって蛍光反射および感度に大きな差異があるためである(60)。プレートを用いる場合、シーリング方法(熱結着vs. 接着剤)がプレートの外周部におけるサンプルの蒸発に影響を及ぼす可能性があるため、これも記録する必要がある。

PCR効率是用いられるプライマーに高度に依存するため、その配列は公にしなければならない。この要件は、そのプライマーとプローブの配列を利用可能にするという前例が企業にはあるため、市販のプライマーを用いる場合でも完全に実行可能である([http://www.primersdesign.co.uk/research\\_with\\_integrity.asp](http://www.primersdesign.co.uk/research_with_integrity.asp))。

また、RTprimerDBなどの公共データベースへの提出も強く推奨される。長年の間に、これらのデータベースが全般的な情報センターになると考えられる。

### 7.1. 二次構造

核酸ターゲットの構造(例、ステムおよびループ二次RNA構造)は、逆転写およびPCRの効率に大きな影響を与える。このため、プライマー、プローブ、PCRアンプリコンの位置ではRNAテンプレートの折り畳み構造を考慮に入れなければならない。mfold for DNA (<http://mfold.bioinfo.rpi.edu/cgi-bin/dna-form1.cgi>) またはRNA (<http://frontend.bioinfo.rpi.edu/applications/mfold/cgi-bin/rna-form1-2.3.cgi>)

などの核酸-折り畳みソフトウェアにより配列を確認する必要がある。理想的には、その折り畳み構造を査読者が閲覧できるようにすべきである。

### 7.2 特異性

BLASTなどの*in silico*ツールまたは同等の特異性サーチは、アッセイデザインに有用である。偽遺伝子またはその他の予期しないターゲットに対する測定可能な相同性はすべて記録し、査読のためアライメントを行った配列として提示する必要がある。ただし、特異性は直接的な実験上のエビデンス(電気泳動ゲル、融解プロファイル、DNAシーケンス、アンプリコンサイズ、制限酵素消化)により実験的に妥当性を検証しなければならない。

オリゴヌクレオチドの融解温度( $T_m$ )を予測するアルゴリズムは初期デザインに有用であるが、アニーリングに用いる実際の最適温度は実験を行った上で決定しなければならない。プライマーの最適化は時代遅れとなってしまうが、アニーリングの最適化が不十分であるとアッセイ品質に多大な影響を及ぼすことは明らかである(51)。プライマーダイマーが顕著に存在すると、プローブを用いたアッセイではPCR効率が低下し、SYBR Green Iを用いたアッセイでは偽陽性が発生する可能性がある。プライマー最適化に関する何らかのエビデンスを査読者に提示すべきであり、理想的にはアニーリング温度や $Mg^{2+}$ 勾配の形式か、 $C_q$ 値、蛍光vs. サイクル数のプロット、融解曲線として示すのがよい(61)。

### 7.3. コントロールおよび定量キャリブレーション

すべてのqPCR反応には、上記のRT-qPCRアッセイにおける非逆転写コントロールに加えて、追加のコントロールおよび定量キャリブレーション、またはそのいずれかが必要である。NTCは、プローブを用いる場合にPCR汚染を検出し、SYBR Green I反応において意図しない増幅産物(例、プライマーダイマー)を意図したPCR産物と区別することもできる。NTCは各プレートまたはサンプルバッチに含め、データ棄却の条件を確立する必要がある。例えば、 $C_q$ 値が40以上のNTCは、未知の最低濃度に対する $C_q$ が35である場合には無視できる。

実験サンプルから抽出した核酸という形での陽性コントロールは、長期にわたるアッセイの変動を監視するために有用であり、キャリブレーション曲線をランごとの実施しない場合は不可欠である。

用いられる可能性のある定量キャリブレーションを以下に挙げる。完全にPCRアンプリコンを含む合成RNAやDNA、プラスミドDNA、プラス

ミドにクローニングされたcDNA、*in vitro*転写RNA、リファレンスRNAプール、特定の生物学的サンプル由来のRNAおよびDNA、国際的に認められた生物学的スタンダード(利用可能になったため)である。希釈はキャリアtRNAが既定濃度になるように(10~100 ng/ $\mu$ Lの酵母または大腸菌)実施する必要がある。ヒト病原体の検出では、キャリブレータを陰性コントロールサンプルRNAまたはDNAに希釈したり、また健康なヒト血漿に希釈して、その後キャリアtRNAの存在下で溶解を実施することができる。特定のテンプレートの連続希釈液は、数回の凍結融解サイクルに耐えるストック溶液として調製できる。Cが0.5~1.0変化したことが検出されたら、新鮮なバッチを調製すべきである。また別の方法として、キャリブレーション曲線に用いる溶液は4°Cで1週間保存可能であり、その後廃棄すべきである。

診断アッセイでは、アッセイの線形区間内に位置する独立して検証されたキャリブレータを、可能であれば含める必要がある。陽性および陰性抽出コントロールもおくことをお勧めする。

#### 7.4. アッセイパフォーマンス

以下のアッセイパフォーマンスの特性を決定しなければならない。PCR効率、リニアダイナミックレンジ、LOD、精度である。

7.4.1. PCR効率。堅牢かつ正確なqPCRアッセイは通常、高効率なPCRと関係している。ターゲット遺伝子のmRNA濃度をリファレンス遺伝子のmRNA濃度の比として報告する場合、PCR効率は特に重要である。サンプル間の濃度差を決定する方法として、 $\Delta\Delta C_q$ 法は最も知られている手法の1つであり、単一のリファレンス遺伝子によるノーマライゼーションに基づいている。ターゲット遺伝子とリファレンス遺伝子間のC値の差( $\Delta C_q$ )を計算し、異なるサンプルの $\Delta C_q$ を直接比較する。比較を正確にするためには、2つの遺伝子が同等の効率で増幅されなければならない。最も普及している手法が必ずしも最も適切であるとは限らないが、増幅効率の差異を修正するため(62)および複数のリファレンス遺伝子の使用を可能にするため(30)に、より一般化した定量モデルがすでに開発されている。

PCR増幅効率は検量線の平均によって確立する必要がある。なぜなら、そうしたキャリブレーションは簡単で、迅速で、再現性のある平均PCR効率、解析感度、アッセイの堅牢性の指標を提供するためである。増幅効率は、検量線サンプルの対数線形部分の傾きから決定する。

具体的には、初期テンプレート濃度(独立変数)の対数値をx軸にプロットし、C(従属変数)をy軸にプロットする場合、PCR効率= $10^{-1/\text{傾き}-1}$ となる。理論的最大値である1.00(または100%)は、産物量が1サイクルごとに倍増したことを示す。理想的には、推定PCR効率の平均値のCIまたはSEを、反復検量線から報告する。

各定量ターゲットに対する検量線を提出原稿に記載し、この情報を査読者が閲覧できるようにしなければならない。またこれらの検量線から得られた傾きおよびy切片は発表論文に記載しなければならない。PCR効率に差があると、傾きが異なる検量線が得られる。その結果、ターゲット遺伝子とリファレンス遺伝子のC値の差は、テンプレート量の変化に伴い一定でなくなり、相対濃度の算出が不正確となって、誤解を招く結果が得られることになる。

C値が40を超える場合、効率が低いことが推定されるため正当性が疑われ、一般には報告すべきではないが、そうした恣意的なCカットオフ値の使用は理想的ではない。これは、そのようなカットオフ値が低すぎる(有効な結果を排除する)か、高すぎる(偽陽性結果が増加する)かのいずれかであると考えられるためである(26)。

7.4.2. リニアダイナミックレンジ。反応が線形となるダイナミックレンジ(検量線によって確立された定量可能な最高コピー数から最低コピー数まで)を記載しなければならない。検量線を作成するために用いるテンプレートにもよるが、ダイナミックレンジは少なくとも3桁以上をカバーする必要があり、理想的には5または6桁に拡大すべきである。検量線の線形区間には、定量するターゲット核酸の範囲が含まれていなければならない。低濃度の定量は通常、きちんと定義されないため、線形区間内であると主張される最低濃度での変動を決定すべきである。相関係数( $r^2$ 値)も報告しなければならない。理想的には、リニアダイナミックレンジ全体からCIを示すのがよい。

7.4.3. LOD。LODは、陽性サンプルの95%が検出される最低濃度と定義される。言い換えると、LOD濃度でターゲットを含有する繰り返し群内で反応が失敗する確率が5%しかないということである。低コピーPCRは確率的な制限を受け、PCRあたり3コピー未満のLODは不可能である。しかし、多数の反応を実施する場合、低濃度の正確な定量はデジタルPCRによって達成できる可能性がある(29, 63, 64)。実際、濃度キャリブレータは、希釈を抑えて、失敗および成功する反応の割合がポワソン分布に従うことを示すことによって確認できる。



7.4.4. 精度。qPCR結果の変動性には多くの説明があり、例を挙げると、アニーリングおよび変性またはそのいずれか片方の完了に影響を及ぼす温度差、ピペティングエラーが原因の濃度差、確率的変動などがある。qPCRの精度は一般に濃度によって変動し、コピー数に伴って低下する。理想的には、アッセイ内変動（反復性(repeatability)は、レプリケートサンプルによる検量線上のSDエラーバーまたはCIを数値で示す必要がある。CVはC<sub>t</sub>と共に用いるべきではない(29)が、コピー数または濃度の変動を表すために用いることができる。この技術的変動性は生物学的変動性と区別する必要がある。生物学的レプリケートは、qPCR結果における群間または処理間差の統計学的有意性に直接対応することができる。診断アッセイについては、試験実施場所および異なるオペレータ間のアッセイ間精度(再現性)を報告する必要もある。

#### 7.5. マルチプレックスqPCR

マルチプレックス処理能は、qPCR解析の検出力を大幅に拡大し(65, 66)、特に点突然変異または多型の同時検出に適用する場合、影響が大きい(67)。マルチプレックス化にあたっては、1本のチューブでの複数のターゲットの正確な定量が損なわれないことを示すエビデンスの提示を必要とする。つまり、アッセイ効率とLODが、そのアッセイをユニプレックス法で実施したときと同じであることを示す必要がある。この問題は、量がかかなり少ないターゲットを量かきわめて多いターゲットと同時増幅する場合に、特に重大になる。

### 8. データ解析

データ解析には、生データの調査、その品質および信頼性の評価、報告可能な結果の作成が含まれる。多様なデータ収集およびデータ処理法が示され、各qPCRデータ解析法の性能が大幅に異なることが系統的評価によって明らかにされた(68)。

データ解析および信頼性推定の方法に関する詳細な情報が必要であり、用いたソフトウェアの仕様も併せて示さなければならない。外れ値の設定方法、およびそうしたデータの処置方法を設定しなければならない。アッセイ精度の記録には、変動性を評価するために用いた統計学的手法(例、95%CI)と対応する濃度やC<sub>t</sub>値の提示を必要とする。そのような情報には、可能であれば、反復性と再現性のデータも含めるとよい。上記に考察したように、C<sub>t</sub>に対するCVの報告は不適切である(29)が、これは、C<sub>t</sub>が、コピー数に対して算出されるCVよりも常に低い

(したがって、誤解を招く可能性がある)と考えられるためである。報告した群間差の統計学的有意性など、確度を評価するために用いた手法に関する情報を提示しなければならない。

#### 8.1. ノーマライゼーション

ノーマライゼーションのプロセスは、抽出収量、逆転写収量、増幅効率のばらつきを統制し、多様なサンプル間のmRNA濃度の比較を可能にすることから、ノーマライゼーションは信頼性の高いqPCRアッセイに不可欠な要素である。内部コントロールとしてのリファレンス遺伝子の使用は、細胞mRNAデータのノーマライゼーションに用いられる最も頻度の高い手法である。しかし、リファレンス遺伝子の使用は一般に最も適切なノーマライゼーション法として認められている(69)が、その利用にあたっては、特定の組織または細胞型および特異的な実験デザインの妥当性を実験的に検証しなければならない。体系的バリデーションの重要性に対する認識は高まっており、ノーマライゼーションに不適切なリファレンス遺伝子を用いると誤解を招く可能性の高い影響があることは広く知られているが、残念なことに、これらの考慮事項は依然として軽視されている(70)。したがって、多くの分子的解析には、ノーマライゼーションが不十分なqPCRデータが含まれている。

ノーマライゼーションには、「リファレンス遺伝子のmRNA濃度」に対する「関心遺伝子のmRNA濃度」の比を報告する必要がある。リファレンス遺伝子のmRNAは、安定して発現しているべきであり、その存在量がサンプル中に存在するmRNAの総量に強い相関を示しているはずである。

単一のリファレンス遺伝子に対するノーマライゼーションは認められないが、査読者のために、記載される実験条件下で発現量が変化しないことを確認する明確なエビデンスを示している場合はこの限りではない。リファレンス遺伝子の最適な数および選択は実験を行って決定し、その方法を報告する必要がある(71-73)。

#### 8.2. 変動性

生体システムに固有の変動性は、実験上の群間差と同等以上であると考えられる。この変動性はしばしば、多くの生物学的レプリケートを用いて実験の統計学的有意性を増加させる場合に認められる。生物学的レプリケート間の差異は大きいと考えられるが、十分な数があれば、判別される実験上の差異は小さくなる可能性がある。最近の論文では、そうしたデータの取り扱い、および大きな生物学的変動性の影響を受けるアッセイから生物学的に意味のあるデ

ータを救済する方法を示している(74)。多くの因子が実験的変動性に関わっており、特定の統計的検出力を達成するために必要な生物学的レプリケート数に影響を及ぼしている。このため、有効な結論を導くために必要なサンプル数を決定するには検出力の分析が有用である。

### 8.3. 定性分析

核酸テンプレートの量を正確に定量するのではなく、単にその有無を検出するためにPCRを使用する場合は定性PCRと呼ばれ、病原菌診断などで広く用いられている。PCR法の定性/定量的分類により生じる問題としては、正確な「陽性/陰性」の回答にそのPCRアッセイの下限感度に関する情報が必要であることである。このため、定性アッセイでも、アッセイパフォーマンス特性に関する情報を示すことが必要であり、特に第7.4.2.節および7.4.3.節で考察した点が重要になってくる。

### 結論

qPCRおよびRT-qPCRアッセイの品質保証方法を確認する必要性は十分認識されている(25, 44, 75-86)。qPCRと従来(旧式)のPCRアッセイの主な相違点は、qPCRにはターゲット核酸を正確に定量する性能が求められている点である。この相違を明確に認識し、従来のPCRアッセイをqPCRフォーマットに直接移行することはできないと考えるべきである。表1に、qPCR研究論文を作成中の執筆者のためのチェックリストを示す。査読者がその研究を評価し、また他の研究者がそれを再現するには、必須(E)の項目が要求される。望ましい(D)とみなされる項

目も重要であり、可能ならば加えるべきであるが、すべての事例で情報入手できない可能性もある。つまり、常識を働かせることが重要である。例えば、数百ものターゲットを標的とする発現シグネチャーの初期スクリーニングに、チェックリストのあらゆる項目を遵守する必要はない。しかし、より少数のターゲット(20個未満)を特定されたら、チェックリスト(<http://www.rdml.org/miqe/>に掲載)に従ってアッセイパフォーマンスをできるだけ詳細に記載する必要がある。

要約すると、これらのガイドラインの目的は以下の3つである。

1. 論文執筆者が、より大きな本質的価値のあるqPCR実験をデザインおよび報告できるようにすること。
2. 査読者および編集者が、提出された原稿の技術的な質を確立された判断基準に即して測定できるようにすること。
3. これらのガイドラインに従っている発表研究に記載される実験を容易に再現できるようにすること。

その結果、広く受け入れられているqPCR技術を用いる研究者は、より均一で比較可能なデータを作成し、最終的に信頼性の高いデータを得られるようになるだろう。

この日本語版MIQEガイドラインは、原著を理解するための参考としてロシュ・ダイアグノスティクス株式会社が翻訳したものです。この翻訳文と原文に相違がある場合には、原文の記載事項が優先します。

**Author Contributions:** All authors confirmed they have contributed to the intellectual content of this paper and have met the following 3 requirements: (a) significant contributions to the conception and design, acquisition of data, or analysis and interpretation of data; (b) drafting or revising the article for intellectual content; and (c) final approval of the published article.

**Authors' Disclosures of Potential Conflicts of Interest:** Upon manuscript submission, all authors completed the Disclosures of Potential Conflict of Interest form. Potential conflicts of interest:

**Employment Leadership:** J. Hellemans, Biogazelle; J. Vandesompele, Biogazelle; C.T. Wittwer, Idaho Technology.

**Consultant or Advisory Role:** R. Mueller, DermTech International.

**Stock Ownership:** R. Mueller, Sequenom; C.T. Wittwer, Idaho Technology.

**Honoraria:** None declared.

**Research Funding:** S.A. Bustin, Bowel and Cancer Research, registered charity number 1119105; J. Hellemans, Fund for Scientific Research Flanders; M. Kubista, grant agency of the Academy of Sciences, Czech Republic (grants IAA500520809 and AV0250520701); C.T. Wittwer, ARUP Institute for Clinical and Experimental Pathology and Idaho Technology.

**Expert Testimony:** None declared.

**Role of Sponsor:** The funding organizations played no role in the design of study, choice of enrolled patients, review and interpretation of data, or preparation or approval of manuscript.

This article has been translated with the permission of AACC. AACC is not responsible for the accuracy of the translation. The views presented are those of the authors and not necessarily those of the AACC or the Journal. Reprinted from Clin Chem, 2009; 55:611-622, by permission of AACC. Original copyright © 2009 American Association for Clinical Chemistry, Inc. When citing this article, please refer to the original English publication source in the journal, Clinical Chemistry.

## References

- Higuchi R, Dollinger G, Walsh PS, Griffith R. Simultaneous amplification and detection of specific DNA sequences. *Biotechnology (N Y)* 1992; 10:413–7.
- Higuchi R, Fockler C, Dollinger G, Watson R. Kinetic PCR analysis: real-time monitoring of DNA amplification reactions. *Biotechnology (N Y)* 1993; 11:1026–30.
- Wittwer CT, Herrmann MG, Moss AA, Rasmussen RP. Continuous fluorescence monitoring of rapid cycle DNA amplification. *Biotechniques* 1997; 22: 130–8.
- Bustin SA. Absolute quantification of mRNA using real-time reverse transcription polymerase chain reaction assays. *J Mol Endocrinol* 2000; 25: 169–93.
- Kubista M, Andrade JM, Bengtsson M, Forootan A, Jonak J, Lind K, et al. The real-time polymerase chain reaction. *Mol Aspects Med* 2006; 27:95–125.
- Bernard PS, Wittwer CT. Real-time PCR technology for cancer diagnostics. *Clin Chem* 2002; 48: 1178–85.
- Mackay IM, Arden KE, Nitsche A. Real-time PCR in virology. *Nucleic Acids Res* 2002; 30:1292–305.
- Mackay IM. Real-time PCR in the microbiology laboratory. *Clin Microbiol Infect* 2004; 10:190–212.
- Bustin SA, Mueller R. Real-time reverse transcription PCR (qRT-PCR) and its potential use in clinical diagnosis. *Clin Sci (Lond)* 2005; 109: 365–79.
- Bustin SA, Mueller R. Real-time reverse transcription PCR and the detection of occult disease in colorectal cancer. *Mol Aspects Med* 2006; 27: 192–223.
- van den Berg RJ, Vaessen N, Endtz HP, Schulm T, van der Vorm ER, Kuijper EJ. Evaluation of real-time PCR and conventional diagnostic methods for the detection of *Clostridium difficile*-associated diarrhoea in a prospective multicentre study. *J Med Microbiol* 2007; 56:36–42.
- Bustin SA, Nolan T. Pitfalls of quantitative real-time reverse-transcription polymerase chain reaction. *J Biomol Tech* 2004; 15:155–66.
- Garson JA, Huggett JF, Bustin SA, Pfaffl MW, Benes V, Vandesompele J, Shipley GL. Unreliable real-time PCR analysis of human endogenous retrovirus-W (HERV-W) RNA expression and DNA copy number in multiple sclerosis. *AIDS Res Hum Retroviruses*. Forthcoming 2009.
- Huang T, Bohlenius H, Eriksson S, Parcy F, Nilsson O. The mRNA of the *Arabidopsis* gene FT moves from leaf to shoot apex and induces flowering. *Science* 2005; 309:1694–6.
- Bohlenius H, Eriksson S, Parcy F, Nilsson O. Retraction. *Science* 2007; 316:367.
- Brazma A, Hingamp P, Quackenbush J, Sherlock G, Spellman P, Stoeckert C, et al. Minimum information about a microarray experiment (MIAME)—toward standards for microarray data. *Nat Genet* 2001; 29:365–71.
- Taylor CF, Paton NW, Lilley KS, Binz PA, Julian RK Jr, Jones AR, et al. The minimum information about a proteomics experiment (MIAPE). *Nat Biotechnol* 2007; 25:887–93.
- Field D, Garrity G, Gray T, Morrison N, Selengut J, Sterk P, et al. The minimum information about a genome sequence (MIGS) specification. *Nat Biotechnol* 2008; 26:541–7.
- Echeverri CJ, Beachy PA, Baum B, Boutros M, Buchholz F, Chanda SK, et al. Minimizing the risk of reporting false positives in large-scale RNAi screens. *Nat Methods* 2006; 3:777–9.
- Haney SA. Increasing the robustness and validity of RNAi screens. *Pharmacogenomics* 2007; 8: 1037–49.
- Sansone SA, Fan T, Goodacre R, Griffin JL, Hardy NW, Kaddurah-Daouk R, et al. The metabolomics standards initiative. *Nat Biotechnol* 2007; 25:846–8.
- Taylor CF, Field D, Sansone SA, Aerts J, Apweiler R, Ashburner M, et al. Promoting coherent minimum reporting guidelines for biological and biomedical investigations: the MIBBI project. *Nat Biotechnol* 2008; 26:889–96.
- Burns MJ, Valdivia H, Harris N. Analysis and interpretation of data from real-time PCR trace detection methods using quantitation of GM soya as a model system. *Anal Bioanal Chem* 2004; 378: 1616–23.
- Burns MJ, Nixon GJ, Foy CA, Harris N. Standardisation of data from real-time quantitative PCR methods – evaluation of outliers and comparison of calibration curves. *BMC Biotechnol* 2005; 5:31.
- Ellison SL, English CA, Burns MJ, Keer JT. Routes to improving the reliability of low level DNA analysis using real-time PCR. *BMC Biotechnol* 2006; 6:33.
- Burns MJ, Valdivia H. Modelling the limit of detection in real-time quantitative PCR. *Eur Food Res Technol* 2008; 226:1513–24.
- Lefever S, Hellemans J, Pattyn F, Przybylski DR, Taylor C, Geurts R, et al. RDML: structured language and reporting guidelines for real-time quantitative PCR data. *Nucleic Acids Res* [Epub ahead of print 2009 Feb 17]. Available at: <http://nar.oxfordjournals.org/cgi/content/abstract/gkp056>.
- Wittwer CT, Kusakawa N. Real-time PCR. In: Persing DH, Tenover FC, Versalovic J, Tang JW, Unger ER, Helman DA, White TJ, eds. *Molecular microbiology: diagnostic principles and practice*. Washington: ASM Press; 2004. p 71–84.
- Schmittgen TD, Livak KJ. Analyzing real-time PCR data by the comparative  $C_t$  method. *Nat Protoc* 2008; 3:1101–8.
- Hellemans J, Mortier G, De Paep A, Speleman F, Vandesompele J. qBase relative quantification framework and software for management and automated analysis of real-time quantitative PCR data. *Genome Biol* 2007; 8:R19.
- de la Grange P, Dutertre M, Correa M, Auboeuf D. A new advance in alternative splicing databases: from catalogue to detailed analysis of regulation of expression and function of human alternative splicing variants. *BMC Bioinformatics* 2007; 8:180.
- Ben-Dov C, Hartmann B, Lundgren J, Valcarcel J. Genome-wide analysis of alternative pre-mRNA splicing. *J Biol Chem* 2008; 283:1229–33.
- Bjornsson HT, Albert TJ, Ladd-Acosta CM, Green RD, Rongione MA, Middle CM, et al. SNP-specific array-based allele-specific expression analysis. *Genome Res* 2008; 18:771–9.
- Pattyn F, Robbrecht P, De Paep A, Speleman F, Vandesompele J. RTPrimerDB: the real-time PCR primer and probe database, major update 2006. *Nucleic Acids Res* 2006; 34:D684–8.
- Pattyn F, Speleman F, De Paep A, Vandesompele J. RTPrimerDB: the real-time PCR primer and probe database. *Nucleic Acids Res* 2003; 31: 122–3.
- Gygi SP, Rochon Y, Franza BR, Aebersold R. Correlation between protein and mRNA abundance in yeast. *Mol Cell Biol* 1999; 19:1720–30.
- Schmidt MW, Houseman A, Ivanov AR, Wolf DA. Comparative proteomic and transcriptomic profiling of the fission yeast *Schizosaccharomyces pombe*. *Mol Syst Biol* 2007; 3:79.
- Landi D, Gemignani F, Naccarati A, Pardini B, Vodicka P, Vodickova L, et al. Polymorphisms within micro-RNA-binding sites as a standard risk of sporadic colorectal cancer. *Carcinogenesis* 2008; 29: 579–84.
- Cronin M, Ghosh K, Sistare F, Quackenbush J, Vilker V, O'Connell C. Universal RNA reference materials for gene expression. *Clin Chem* 2004; 50:1464–71.
- Novoradovskaya N, Whitfield ML, Basehore LS, Novoradovsky A, Pesich R, Usary J, et al. Universal Reference RNA as a standard for microarray experiments. *BMC Genomics* 2004; 5:20.
- Gingeras TR. RNA reference materials for gene expression studies. Difficult first steps. *Clin Chem* 2004; 50:1289–90.
- Joseph LJ. RNA reference materials for gene expression studies. RNA metrology: forecast calls for partial clearing. *Clin Chem* 2004; 50:1290–2.
- Bustin SA, Benes V, Nolan T, Pfaffl MW. Quantitative real-time RT-PCR—a perspective. *J Mol Endocrinol* 2005; 34:597–601.
- Ramsden SC, Daly S, Geilenkeuser WJ, Duncan G, Hermitte F, Marubini E, et al. EQUAL-quant: an international external quality assessment scheme for real-time PCR. *Clin Chem* 2006; 52:1584–91.
- Damond F, Benard A, Ruelle J, Alabi A, Kupfer B, Gomes P, et al. Quality control assessment of human immunodeficiency virus type 2 (HIV-2) viral load quantification assays: results from an international collaboration on HIV-2 infection in 2006. *J Clin Microbiol* 2008; 46:2088–91.
- Micke P, Ohshima M, Tahmasebpour S, Ren ZP, Ostman A, Ponten F, Botling J. Biobanking of fresh frozen tissue: RNA is stable in nonfixed surgical specimens. *Lab Invest* 2006; 86:202–11.
- Morrogh M, Olvera N, Bogomolnij F, Borgen PI, King TA. Tissue preparation for laser capture microdissection and RNA extraction from fresh frozen breast tissue. *Biotechniques* 2007; 43: 41–2, 4, 6 passim.
- Bustin SA. Real-time, fluorescence-based quantitative PCR: a snapshot of current procedures and preferences. *Expert Rev Mol Diagn* 2005; 5: 493–8.
- Doma MK, Parker R. RNA quality control in eukaryotes. *Cell* 2007; 131:660–8.
- Fleige S, Pfaffl MW. RNA integrity and the effect on the real-time qRT-PCR performance. *Mol Aspects Med* 2006; 27:126–39.
- Nolan T, Hands RE, Bustin SA. Quantification of mRNA using real-time RT-PCR. *Nat Protoc* 2006; 1:1559–82.
- Nolan T, Hands RE, Ogunkolade BW, Bustin SA. SPUD: a qPCR assay for the detection of inhibitors in nucleic acid preparations. *Anal Biochem* 2006; 351:308–10.
- Ferns RB, Garson JA. Development and evaluation of a real-time RT-PCR assay for quantification of cell-free human immunodeficiency virus type 2 using a brome mosaic virus internal control. *J Virol Methods* 2006; 135:102–8.

54. Swango KL, Hudlow WR, Timken MD, Buoncris-tiani MR. Developmental validation of a multiplex qPCR assay for assessing the quantity and quality of nuclear DNA in forensic samples. *Forensic Sci Int* 2007;170:35–45.
55. Garson JA, Grant PR, Ayliffe U, Ferns RB, Tedder RS. Real-time PCR quantitation of hepatitis B virus DNA using automated sample preparation and murine cytomegalovirus internal control. *J Virol Methods* 2005;126:207–13.
56. Huggett JF, Novak T, Garson JA, Green C, Morris-Jones SD, Miller RF, Zumla A. Differential suscep-tibility of PCR reactions to inhibitors: an important and unrecognised phenomenon. *BMC Res Notes* 2008;1:70.
57. Ståhlberg A, Aman P, Ridell B, Mostad P, Kubista M. Quantitative real-time PCR method for detec-tion of B-lymphocyte monoclonality by comparison of  $\kappa$ - and  $\lambda$  immunoglobulin light chain expression. *Clin Chem* 2003;49:51–9.
58. Ståhlberg A, Hakansson J, Xian X, Semb H, Kubista M. Properties of the reverse transcription reaction in mRNA quantification. *Clin Chem* 2004;50:509–15.
59. Ståhlberg A, Kubista M, Pfaffl M. Comparison of reverse transcriptases in gene expression analysis. *Clin Chem* 2004;50:1678–80.
60. Reiter M, Pfaffl M. Effects of plate position, plate type and sealing systems on real-time PCR results. *Biotechnol Biotechnol Equip* 2008;22: 824–8.
61. Ririe KM, Rasmussen RP, Wittwer CT. Product dif-ferentiation by analysis of DNA melting curves during the polymerase chain reaction. *Anal Bio-chem* 1997;245:154–60.
62. Pfaffl MW. A new mathematical model for relative quantification in real-time RT-PCR. *Nucleic Acids Res* 2001;29:E45.
63. Dube S, Qin J, Ramakrishnan R. Mathematical analysis of copy number variation in a DNA sample using digital PCR on a nanofluidic device. *PLoS ONE* 2008;3:e2876.
64. Vogelstein B, Kinzler KW. Digital PCR. *Proc Natl Acad Sci U S A* 1999;96:9236–41.
65. Elnifro EM, Ashshi AM, Cooper RJ, Klapper PE. Multiplex PCR: optimization and application in diagnostic virology. *Clin Microbiol Rev* 2000;13: 559–70.
66. Wittwer CT, Herrmann MG, Gundry CN, Elenitoba-Johnson KS. Real-time multiplex PCR assays. *Methods* 2001;25:430–42.
67. Elenitoba-Johnson KS, Bohling SD, Wittwer CT, King TC. Multiplex PCR by multicolor fluorimetry and fluorescence melting curve analysis. *Nat Med* 2001;7:249–53.
68. Karlen Y, McNair A, Perseguers S, Mazza C, Mer-mod N. Statistical significance of quantitative PCR. *BMC Bioinformatics* 2007;8:131.
69. Huggett J, Dheda K, Bustin S, Zumla A. Real-time RT-PCR normalisation; strategies and consider-ations. *Genes Immun* 2005;6:279–84.
70. Gutierrez L, Mauriat M, Guenin S, Pelloux J, Lefe-bvre JF, Louvet R, et al. The lack of a systematic validation of reference genes: a serious pitfall undervalued in reverse transcription-polymerase chain reaction (RT-PCR) analysis in plants. *Plant Biotechnol J* 2008;6:609–18.
71. Vandesompele J, De Preter K, Pattyn F, Poppe B, Van Roy N, De Paepe A, Speleman F. Accurate nor-malization of real-time quantitative RT-PCR data by geometric averaging of multiple internal con-trol genes. *Genome Biol* 2002;3: RESEARCH0034.
72. Pfaffl MW, Horgan GW, Dempfle L. Relative expression software tool (REST) for group-wise comparison and statistical analysis of relative expression results in real-time PCR. *Nucleic Acids Res* 2002;30:e36.
73. Andersen CL, Jensen JL, Orntoft TF. Normalization of real-time quantitative reverse transcription-PCR data: a model-based variance estimation approach to identify genes suited for normaliza-tion, applied to bladder and colon cancer data sets. *Cancer Res* 2004;64:5245–50.
74. Willems E, Leyns L, Vandesompele J. Standard-ization of real-time PCR gene expression data from independent biological replicates. *Anal Bio-chem* 2008;379:127–9.
75. Apfalter P, Reischl U, Hammerschlag MR. Inhouse nucleic acid amplification assays in research: How much quality control is needed before one can rely upon the results? *J Clin Microbiol* 2005;43:5835–41.
76. Ciabatti I, Froio A, Gatto F, Amaddeo D, Marchesi U. In-house validation and quality control of real-time PCR methods for GMO detection: a practi-cal approach. *Dev Biol (Basel)* 2006;126: 79–86; discussion 324–5.
77. de Cremoux P, Bieche I, Tran-Perennou C, Vignaud S, Boudou E, Asselain B, et al. Inter-laboratory quality control for hormone-dependent gene expression in human breast tumors using real-time reverse transcription-polymerase chain reaction. *Endocrine Relat Cancer* 2004;11:489–95.
78. de Vries TJ, Fourkour A, Punt CJ, van de Locht LT, Wobbes T, van den Bosch S, et al. Reproducibility of detection of tyrosinase and MART-1 transcripts in the peripheral blood of melanoma patients: a quality control study using real-time quantitative RT-PCR. *Br J Cancer* 1999;80:883–91.
79. Gabert J, Beillard E, van der Velden VH, Bi W, Grim-wade D, Pallisgaard N, et al. Standardization and quality control studies of 'real-time' quantitative reverse transcriptase polymerase chain reaction of fusion gene transcripts for residual disease detection in leukemia – a Europe Against Cancer program. *Leukemia* 2003;17:2318–57.
80. Lemmer K, Donoso Mantke O, Bae HG, Groen J, Drosten C, Niedrig M. External quality control assessment in PCR diagnostics of dengue virus infections. *J Clin Virol* 2004;30:291–6.
81. Marubini E, Verderio P, Raggi CC, Pazzagli M, Orlando C. Statistical diagnostics emerging from external quality control of real-time PCR. *Int J Biol Markers* 2004;19:141–6.
82. Raggi CC, Verderio P, Pazzagli M, Marubini E, Simi L, Pinzani P, et al. An Italian program of external quality control for quantitative assays based on real-time PCR with Taq-Man probes. *Clin Chem Lab Med* 2005;43:542–8.
83. Sjöholm MI, Dillner J, Carlson J. Assessing quality and functionality of DNA from fresh and archival dried blood spots and recommendations for qual-ity control guidelines. *Clin Chem* 2007;53: 1401–7.
84. Wang X, Jia S, Meyer L, Xiang B, Chen LY, Jiang N, et al. Comprehensive quality control utilizing the prehybridization third-dye image leads to accurate gene expression measurements by cDNA microarrays. *BMC Bioinformatics* 2006;7:378.
85. Winters MA, Tan LB, Katzenstein DA, Merigan TC. Biological variation and quality control of plasma human immunodeficiency virus type 1 RNA quan-titation by reverse transcriptase polymerase chain reaction. *J Clin Microbiol* 1993;31: 2960–6.
86. van der Velden VH, Panzer-Grumayer ER, Cazza-niga G, Flohr T, Sutton R, Schrauder A, et al. Opti-mization of PCR-based minimal residual disease diagnostics for childhood acute lymphoblastic leukemia in a multi-center setting. *Leukemia* 2007;21:706–13.
