# Supplementary material for: The MIQE Guidelines: Minimum Information for Publication of Quantitative Real-Time PCR Experiments
Source: Oxford University Press journal article supplement (doi:10.1373/clinchem.2008.112797), 2009-02-27
Supplement: miqe_-_arabic.pdf [file miqe_-_arabic.pdf]

## MIQE إرشادات

### الحد الأدنى من المعلومات لنشر تجارب تفاعل البلمرة المتسلسل الكمي (في الوقت الحقيقي) (RT-qPCR)

#### (الوقت الحقيقي لتفاعل البلمرة المتسلسل)

Stephen A. Bustin,<sup>1\*</sup> Vladimir Benes,<sup>2</sup> Jeremy A. Garson,<sup>3,4</sup> Jan Hellemsans,<sup>5</sup> Jim Huggett,<sup>6</sup> Mikael Kubista,<sup>7,8</sup> Reinhold Mueller,<sup>9</sup> Tania Nolan,<sup>10</sup> Michael W. Pfaffl,<sup>11</sup> Gregory L. Shipley,<sup>12</sup> Jo Vandesompele,<sup>5</sup> and Carl T. Wittwer<sup>13,14</sup>

الخلفية: يوجد حالياً عدم توافق في الآراء حول أفضل السبل الموجودة لتنفيذ وتفسير الوقت الحقيقي لتفاعل البلمرة المتسلسل (qPCR). تتفاقم المشكلة بسبب النقص في التفاصيل الاختبارية في العديد من المنشورات، مما يعوق قدرة القارئ على التقييم الدقيق لجودة النتائج المقدمة أو لإعادة التجارب.

المحتوى: يستهدف الحد الأدنى من المعلومات حول نشر إرشادات تجارب الوقت الحقيقي الكمي لتفاعل البلمرة المتسلسل (MIQE) دقة النتائج للمساعدة على ضمان سلامة المؤلفات العلمية، وتعزيز التنسيق والتوافق بين المختبرات، وزيادة الشفافية التجريبية. MIQE هي عبارة عن مجموعة من الإرشادات تصف الحد الأدنى من المعلومات اللازمة لتقييم تجارب الوقت الحقيقي الكمي لتفاعل البلمرة المتسلسل. وتشمل قائمة مرجعية ترافق التسليم المبدي للمخطوطة للنشر. من خلال توفير جميع الأوضاع التجريبية ذات الصلة وخصائص الاختبارات،

يستطيع المراجعون تقويم صحة البروتوكولات المستخدمة. كما أن الكشف الكامل لجميع مواد المحاليل و التسلسل الحمضي، وأساليب التحاليل هي ضرورية لتمكين باحثين آخرين لإنتاج نتائج جديدة. وينبغي نشر تفاصيل MIQE إما في شكل اختصار أو عبر الخط المباشر للإنترنت.

الموجز: إن إتباع هذه الإرشادات سيشجع على ممارسات تجريبية أفضل، ويسمح بتوفر نتائج موثقة لا لبس فيها حول الوقت الحقيقي الكمي لتفاعل البلمرة المتسلسل.

© 2009 American Association for Clinical Chemistry

الوقت الحقيقي الكمي لتفاعل البلمرة المتسلسل المعتمد على الفلوروسينيت (1-3)، مع قدرتها على كشف وقياس كميات ضئيلة من الأحماض النووية في مجموعة واسعة من العينات من مصادر عديدة، هي أساس التكنولوجيا التقنية للتفوق في التشخيص الجزيئي وعلوم الحياة والزراعة، والطب (4, 5). وان بساطة المفهوم والتطبيق، جنباً إلى جنب السرعة، والحساسية، والنوعية في مقاييس متجانسة، جعلت منها المفتاح لتحديد الكمي للحمض النووي. بالإضافة إلى استخدامها كأداة للبحث، قد وضعت العديد من التطبيقات التشخيصية، بما في ذلك التحديد الكمي الميكروبي، تحديد الجرعة الجينية، وتحديد الجينات المحورة في الأغذية المعدلة وراثياً، وتقييم المخاطر من معاودة السرطان، وتطبيقات تستخدم في الطب الشرعي (6-11).

<sup>1</sup> Centre for Academic Surgery, Institute of Cell and Molecular Science, Barts and the London School of Medicine and Dentistry, London, UK; <sup>2</sup> Genomics Core Facility, EMBL Heidelberg, Heidelberg, Germany; <sup>3</sup> Centre for Virology, Department of Infection, University College London, London, UK; <sup>4</sup> Department of Virology, UCL Hospitals NHS Foundation Trust, London, UK; <sup>5</sup> Center for Medical Genetics, Ghent University Hospital, Ghent, Belgium; <sup>6</sup> Centre for Infectious Diseases, University College London, London, UK; <sup>7</sup> TATAA Biocenter, Göteborg, Sweden; <sup>8</sup> Institute of Biotechnology AS CR, Prague, Czech Republic; <sup>9</sup> Sequenom, San Diego, California, USA; <sup>10</sup> Sigma-Aldrich, Haverhill, UK; <sup>11</sup> Physiology Weihenstephan, Technical University Munich, Freising, Germany; <sup>12</sup> Quantitative Genomics Core Laboratory, Department of Integrative Biology and Pharmacology, University of Texas Health Science Center, Houston, Texas, USA; <sup>13</sup> Department of Pathology, University of Utah, Salt Lake City, Utah, USA; <sup>14</sup> ARUP Institute for Clinical and Experimental Pathology, Salt Lake City, Utah, USA.

\* Address correspondence to this author at: 3rd Floor Alexandra Wing, The Royal London Hospital, London E1 1BB, UK. Fax 44-(0)20-7377 7283; e-mail s.a.bustin@qmul.ac.uk.

Received October 20, 2008; accepted January 27, 2009.

Previously published online at DOI: 10.1373/clinchem.2008.112797

<sup>15</sup> Nonstandard abbreviations: qPCR, quantitative real-time PCR; MIQE, Minimum Information for Publication of Quantitative Real-Time PCR Experiments; RTqPCR, reverse transcription-qPCR; FRET, fluorescence resonance energy transfer; C<sub>q</sub>, quantification cycle, previously known as the threshold cycle (C<sub>t</sub>), crossing point (C<sub>p</sub>), or take-off point (TOP); RDML, Real-Time PCR Data Markup Language; LOD, limit of detection; NTC, no-template control.

ينعكس هذا الرواج في العدد الهائل من المنشورات التي تتضمن بيانات عن الوقت الحقيقي الكمي لتفاعل البلمرة المتسلسل، التي تستخدم دائماً كواشف، وبروتوكولات، وأساليب تحليل، وصيغ تقارير متنوعة. هذا الافتقار الملحوظ إلى التوافق في الآراء بشأن أفضل السبل لإجراء تجارب تفاعل البلمرة المتسلسل الكمي، لديه نتائج سلبية وهي القصور في النتائج المستمرة والمتتالية لسلسلة التجارب والذي يعيق اعتبارها كمقياس مستقل (12). تشمل العيوب التقنية التي تؤثر على أداء الفحص ما يلي: (أ) عدم كفاءة تخزين العينات، أو تحضيرها، أو جودة الحمض النووي، تؤدي إلى درجة عالية من التغيير في النتائج. (ب) سوء اختيار بادئات تفاعل الاستنساخ العكسي و البادئات والدلائل لتفاعل البلمرة المتسلسل مما يؤدي إلى أداء غير فعال. (ج) يمكن أن تكون البيانات والتحليلات الإحصائية الغير ملائمة وتوليد النتائج مضللة إلى حد كبير. وبناء على ذلك، هناك خطر حقيقي من المؤلفات العلمية الخاطئة التي ترافق العديد من المنشورات التي تحتوي على نتائج غير كافية ومتناقضة (13). نشر (14) وتراجع (15) العلوم "اختراقات عام 2005" تقرير يوفر تحذيرات مقلقة. وتتفاقم المشكلة عن طريق عدم توفر المعلومات في معظم تقارير الدراسات التي استخدمت هذه التكنولوجيا، مع العديد من المنشورات التي لا توفر ما يكفي من تفاصيل التجارب ليمكن القارئ تقييم دقة وجودة المعلومات أو إمكانية تكرار التجارب. على وجه التحديد، معلومات الحصول على العينة ونقلها، جودة الحمض النووي الريبي ونقاؤه، تفاصيل الاستنساخ العكسي، وكفاءة تفاعل البلمرة المتسلسل، وفي كثير من الأحيان يتم حذف مقاييس التحليل، في حين أن تطبيع العينة يتم استنادا الى احد الجينات المرجعية دون مبررات كافية.

ترمي هذه الوثيقة تزويد المؤلفين والكتاب والنقاد والمحررين مواصفات الحد الأدنى من المعلومات المبينة في الجدول رقم ١، التي يجب ذكرها لتجارب تفاعل البلمرة المتسلسل الكمي، لضمان دقتها وتفسيرها تفسيراً صحيحاً، وبالتالي تكرارها. MIQE أي الحد الأدنى من المعلومات لنشر تجارب الوقت الحقيقي الكمي لتفاعل البلمرة المتسلسل على غرار المبادئ التوجيهية التي وضعت لمائة و تحليل DNA microarray مجموعة الحمض النووي (16)، تجارب البروتيومييات (17)، مواصفات تسلسل الجينوم (18)، وتلك المناقشة في إطار العمل لتداخل الحمض النووي

الريبي (19، 20)، والايض (21)، وكلها مبادرات منسقة تحت مظلة MIBBI (الحد الأدنى للمعلومات عن التحقيقات البيولوجية والطبية الحيوية، <http://www.mibbi.org>) (22). ليس مقترحاً إلزام إدراج لغة الإبلاغ الموحد للسماح بمشاركة البيانات، على الرغم من أنه من المتوقع أنه يمكن تحديث هذه المبادئ التوجيهية في المستقبل لتشمل هذه التوصيات. بدلا عن ذلك، استهدفت هذه المبادئ التوجيهية وثوقية النتائج للمساعدة في ضمان سلامة المؤلفات العلمية، وتعزيز التماسك بين المختبرات، وزيادة الشفافية التجريبية. وينبغي أن تقرأ بالاقتران مع المنشورات الحديثة التي تتعامل في عمق مسألة توحيد تفاعل البلمرة المتسلسل الكمي (23-26).

### 1 المصطلحات

تتطلب بعض المصطلحات توحيدا لضمان وضوحها:

- 1.1 نقترح أن يتم استخدام اختصار qPCR لتفاعل البلمرة التسلسلي الكمي و RT-qPCR في تطبيقات النسخ العكسي، حيث أن تطبيق اختصار RT-qPCR لـ qPCR يسبب إرباك
- 1.2 الجينات المستخدمة للتطبيع يجب أن تستخدم كجينات مرجعية وليس كجينات تخزينية.
- 1.3 محققات TaqMan يجب أن يشار إليها كمحققات مائية.
- 1.4 المصطلح FRET هو مصطلح يعبر عن (طاقة الفلورسنت لنقل المحققات) وهو يدل على ميكانيكية عامة تعتمد على الانبعاث/التبريد التي تنطلق من التفاعل بين الكروونات المثارة من جزئين من صبغة الفلورسنت. المحققات من نوع Light-Cycler ينبغي أن يشار إليها على أنها محققات التهجين المزدوج.
- 1.5 يسرد قاموس أكسفورد الإنجليزي الكمي فقط وليس النوعي وبالتالي، السابق هي الكلمة الصحيحة.
- 1.6 التسميات التي تصف جزئياً دورة تفاعل البلمرة التسلسلي المستخدمة في القياس الكمي غير متناسقة، مع الحد الأدنى لدورة (C<sub>0</sub>)، نقطة العبور للدورة (C<sub>p</sub>)، ونقطة الإقلاع (TOP) المستخدمة حالياً في المنشورات. كل هذه المصطلحات تدل على نفس القيمة في أجهزة التفاعل الكمي وقد صيغت من الشركات المتنافسة بقصد التفريق وليس على أساس الدقة

**Table 1. MIQE checklist for authors, reviewers, and editors.<sup>a</sup>**

| Item to check                                                                     | Importance     | Item to check                                                            | Importance     |
|-----------------------------------------------------------------------------------|----------------|--------------------------------------------------------------------------|----------------|
| Experimental design                                                               |                | qPCR oligonucleotides                                                    |                |
| Definition of experimental and control groups                                     | E              | Primer sequences                                                         | E              |
| Number within each group                                                          | E              | RTPrimerDB identification number                                         | D              |
| Assay carried out by the core or investigator's laboratory?                       | D              | Probe sequences                                                          | D <sup>d</sup> |
| Acknowledgment of authors' contributions                                          | D              | Location and identity of any modifications                               | E              |
| Sample                                                                            |                | Manufacturer of oligonucleotides                                         | D              |
| Description                                                                       | E              | Purification method                                                      | D              |
| Volume/mass of sample processed                                                   | D              | qPCR protocol                                                            |                |
| Microdissection or macrodissection                                                | E              | Complete reaction conditions                                             | E              |
| Processing procedure                                                              | E              | Reaction volume and amount of cDNA/DNA                                   | E              |
| If frozen, how and how quickly?                                                   | E              | Primer, (probe), Mg <sup>2+</sup> , and dNTP concentrations              | E              |
| If fixed, with what and how quickly?                                              | E              | Polymerase identity and concentration                                    | E              |
| Sample storage conditions and duration (especially for FFPE <sup>b</sup> samples) | E              | Buffer/kit identity and manufacturer                                     | E              |
| Nucleic acid extraction                                                           |                | Exact chemical composition of the buffer                                 | D              |
| Procedure and/or instrumentation                                                  | E              | Additives (SYBR Green I, DMSO, and so forth)                             | E              |
| Name of kit and details of any modifications                                      | E              | Manufacturer of plates/tubes and catalog number                          | D              |
| Source of additional reagents used                                                | D              | Complete thermocycling parameters                                        | E              |
| Details of DNase or RNase treatment                                               | E              | Reaction setup (manual/robotic)                                          | D              |
| Contamination assessment (DNA or RNA)                                             | E              | Manufacturer of qPCR instrument                                          | E              |
| Nucleic acid quantification                                                       | E              | qPCR validation                                                          |                |
| Instrument and method                                                             | E              | Evidence of optimization (from gradients)                                | D              |
| Purity (A <sub>260</sub> /A <sub>280</sub> )                                      | D              | Specificity (gel, sequence, melt, or digest)                             | E              |
| Yield                                                                             | D              | For SYBR Green I, C <sub>q</sub> of the NTC                              | E              |
| RNA integrity: method/instrument                                                  | E              | Calibration curves with slope and y intercept                            | E              |
| RIN/RQI or C <sub>q</sub> of 3' and 5' transcripts                                | E              | PCR efficiency calculated from slope                                     | E              |
| Electrophoresis traces                                                            | D              | CIs for PCR efficiency or SE                                             | D              |
| Inhibition testing (C <sub>q</sub> dilutions, spike, or other)                    | E              | r <sup>2</sup> of calibration curve                                      | E              |
| Reverse transcription                                                             |                | Linear dynamic range                                                     | E              |
| Complete reaction conditions                                                      | E              | C <sub>q</sub> variation at LOD                                          | E              |
| Amount of RNA and reaction volume                                                 | E              | CIs throughout range                                                     | D              |
| Priming oligonucleotide (if using GSP) and concentration                          | E              | Evidence for LOD                                                         | E              |
| Reverse transcriptase and concentration                                           | E              | If multiplex, efficiency and LOD of each assay                           | E              |
| Temperature and time                                                              | E              | Data analysis                                                            |                |
| Manufacturer of reagents and catalogue numbers                                    | D              | qPCR analysis program (source, version)                                  | E              |
| C <sub>q</sub> s with and without reverse transcription                           | D <sup>c</sup> | Method of C <sub>q</sub> determination                                   | E              |
| Storage conditions of cDNA                                                        | D              | Outlier identification and disposition                                   | E              |
| qPCR target information                                                           |                | Results for NTCs                                                         | E              |
| Gene symbol                                                                       | E              | Justification of number and choice of reference genes                    | E              |
| Sequence accession number                                                         | E              | Description of normalization method                                      | E              |
| Location of amplicon                                                              | D              | Number and concordance of biological replicates                          | D              |
| Amplicon length                                                                   | E              | Number and stage (reverse transcription or qPCR) of technical replicates | E              |
| In silico specificity screen (BLAST, and so on)                                   | E              | Repeatability (intraassay variation)                                     | E              |
| Pseudogenes, retropseudogenes, or other homologs?                                 | D              | Reproducibility (interassay variation, CV)                               | D              |
| Sequence alignment                                                                | D              | Power analysis                                                           | D              |
| Secondary structure analysis of amplicon                                          | D              | Statistical methods for results significance                             | E              |
| Location of each primer by exon or intron (if applicable)                         | E              | Software (source, version)                                               | E              |
| What splice variants are targeted?                                                | E              | C <sub>q</sub> or raw data submission with RDML                          | D              |

<sup>a</sup> All essential information (E) must be submitted with the manuscript. Desirable information (D) should be submitted if available. If primers are from RTPrimerDB, information on qPCR target, oligonucleotides, protocols, and validation is available from that source.

<sup>b</sup> FFPE, formalin-fixed, paraffin-embedded; RIN, RNA integrity number; RQI, RNA quality indicator; GSP, gene-specific priming; dNTP, deoxynucleoside triphosphate.

<sup>c</sup> Assessing the absence of DNA with a no–reverse transcription assay is essential when first extracting RNA. Once the sample has been validated as DNA free, inclusion of a no–reverse transcription control is desirable but no longer essential.

<sup>d</sup> Disclosure of the probe sequence is highly desirable and strongly encouraged; however, because not all vendors of commercial predesigned assays provide this information, it cannot be an essential requirement. Use of such assays is discouraged.

العلمية أو التوضيح. نحن نقترح استخدام الدورة الكمية ( $C_q$ ) (quantification cycle) وفقاً لRDML (لغة توصيف البيانات في Real Time-PCR) مقياس البيانات (<http://www.rdml.org>) (27).

### 2 اعتبارات المفاهيم

لشرح وتبرير الإرشادات، نجد أنه من المفيد مراجعة عدد من المفاتيح الرئيسية المحيطة بتفاعل بلمره التسلسلي الكمي:

2.1 الحساسية التحليلية تشير إلى الحد الأدنى من النسخ في العينة التي يمكن قياسها بدقة في الفحص، في حين الحساسية السريرية هي النسبة المئوية من الأشخاص الذين يعانون من اضطراب معين، حيث يحدد الفحص النتيجة الإيجابية للحالة. يتم التعبير عن الحساسية عادة بحد الكشف (LOD)، وهو التركيز الذي يمكن أن يتم الكشف عنه بدرجة معقولة (احتمال 95% شائع الاستخدام) مع إعطاء طريقة التحليل. حد الكشف (LOD) الأكثر حساسية نظرياً 3 نسخ لكل تفاعل بلمره متسلسل (28). على افتراض توزيع بواسون 95% تمنح فرصه لوجود على الأقل نسخة من تفاعل بلمره المتسلسل، ونسخه مفردة للكشف. وعادة ما تشمل طرق التجربة خطوات تجهيز العينة (أي الاستخلاص) وعند الحاجة نقوم بالنسخ العكسي. إذا كانت التغييرات في الحجم وكفاءة هذه الخطوات محسوبة، فحد الكشف (LOD) الأكثر حساسية يمكن التعبير عنه بالوحدات ذات الصلة للتجربة، مثل نسخة من كل نانوغرام من الأنسجة. النتائج التجريبية الأقل من الاحتمال النظري لحد الكشف (LOD) يجب أن لا تصدر نهائياً. وهي أيضاً تتبع النتائج بقيمة (0) ليس لها معنى ومضللة. تقدير حد الكشف (LOD) في تحليلات التفاعل الكمي لتفاعل البلمرة المتسلسل معقداً بسبب الطبيعة اللوغاريتمية لـ  $C_q$ ، وذلك لأن الـ  $C_q$  غير معرف عند ما يكون تركيز المادة الوراثية صفراً. التحديد الملائم والنموذجي لحد الكاشف LOD في التفاعل الكمي لتفاعل البلمرة المتسلسل يعتمد على استمرار البحث (26).

2.2 تشير خصوصية التحليل إلى الكشف عن التفاعل الكمي لتفاعل البلمرة المتسلسل لإعطاء تسلسل الأحماض الأمينية بدلاً من الأهداف الغير مخصصة الموجودة في العينة. خصوصية التشخيص هي النسبة المئوية للأفراد من غير تحديد للحالة التي قد يعرف عنها الفحص بأنها سلبية لهذه الحالة.

2.3 تشير الدقة إلى الفرق بين القياسات التجريبية والتركيزات الفعلية، الموجودة كتغييرات مضاعفة أو في تقدير عدد النسخ.

2.4 تشير القدرة على التكرار (الدقة على المدى القصير أو الفرق داخل المقياس) إلى الدقة والمتانة للمقاييس مع نفس العينات التي تم تحليلها بشكل متكرر في نفس المقياس. ويمكن التعبير بـ SD لاختلافات الـ CQ. بدلاً من ذلك يمكن استخدام SD أو CV لعدد النسخ أو متغيرات التركيز. لا ينبغي أن تستخدم CV مع  $C_q$  (29).

2.5 تشير القدرة على الإنتاج (الدقة على المدى الطويل أو التغير الداخلي للاختبار) إلى تباين في النتائج بين الأشواط المختلفة أو بين المختبرات المختلفة وعادة ما يتم التعبير عنه بـ SD أو بـ CV لعدد النسخ أو التركيزات. تخضع  $C_q$  الناتجة لتغييرات ما بين الأشواط (30)، وبالتالي الإبلاغ عن الاختلاف في  $C_q$  في ما بين الأشواط أمر غير مناسب.

يجب أن توضح بالضبط ما هو الهدف من المنشورات التي تصف تركيزات المادة الوراثية للجينات المستهدفة في الحمض النووي الريبسي. فان عملية الاستنساخ لمعظم الجينات البشرية والعديد من جينات الكائنات المتعددة الخلايا الأخرى هي ربط استبدالي (31، 32) وهذه التغيرات في الارتباط تكون خاصة لكل شكل من البروتينات البديلة مع الاختلاف في أشكال الارتباط التي ذكرت عن أنسجة مختلفة وفي مراحل مختلفة. ونتيجة لذلك، اكسون واحد من المنطقة التي يمكن نسخها في تفاعل البلمرة التسلسلي الكمي قد يكشف عن عدد من متغيرات الربط، بينما منطقة الإنترونات التي لا يمكن ترجمتها تكون محفزة لبادئيات التفاعل أكثر ولكن قد تفقد بعض متغيرات الربط تماماً. وفي الأونة الأخيرة تم ذكر ووصف الجينات من نوع nonimprinted التي تسبب خلل في التعبير (33). وبصورة إجمالية تعني هذه النتائج أن

استخدام الفحص RT-qPCR الذي يستهدف فقط واحدة أو على الأكثر اثنتين من المنطقة التي يمكن ترجمتها من المادة الوراثية للحمض النووي الريبي المرسل لم تعد كافية لمعرفة مستوى التعبير لجين معين. نتيجة لذلك، يجب توفير معلومات لتسلسل بادئيات التفاعل جنباً إلى جنب مع تقييم خصوصيتها في كل ما يتعلق بها لمعرفة متغيرات الربط ومواقع النيوكليوتيد الواحدة المتعدد الأشكال وقاعدة البيانات لها. وللحصول الى مجموعة من بادئيات التفاعل اختيرت من قاعدة البيانات RTprimerDB (34، 35)، ويتم ذلك بسهولة يفضل استشارة المتخصصين في موقع RTprimerDB (<http://www.rtpimerdb.org>) الذي يحتوي على كافة المعلومات ذات الصلة للفحوصات التجارية وعلى الكثير من المعلومات والمقدمين ومعايير التحقيق التجريبي المطلوبة. يجب الإبلاغ عن نتائج الاختبارات غير المتحقق منها والمختبرة منها فقط على الحواسيب بحيث لا يتم تشجيعها.

يجب أن نتذكر أن الكشف عن وجود الحمض النووي الريبي المرسل لا يقدم أي معلومات عما إذا كان سوف يترجم إلى بروتين أو في الواقع ما إذا كان يتم ترجمة البروتين الوظيفي كليا.

Immunohistochemistry, western blotting أو أي من طرق التعيين الكمي الأخرى ليست دائماً قادرة على التعاطي مع البيانات الخلوية الوراثية للحمض النووي الريبي المرسل. والآن أثبت عدم وجود التوافق بين المادة الوراثية للحمض النووي الريبي وبيانات تركيز البروتين في كثير من الأحيان (36)، وهو صحيح لاسيما بالنسبة للحمض النووي الريبي المرسل والذي يحدد البروتينات التي تشكل جزءاً من البروتين المتعدد الوظائف (37). وأخيراً، فقد أصبح من الواضح أن معرفة وجود وظيفة المادة الوراثية الدقيقة microRNAs مهمة لفهم التعبير الجيني كونه قادراً على تحديد أنواع الحمض النووي الريبي المرسل (38).

ومن الضروري أيضاً أن تكون على علم أن معظم كميات بيانات الحمض النووي الريبي ليست مطلقة، وإنما نسبية. وهكذا، فإن الجينات المرجعية أو المواد المستخدمة للمواصفات هي الحاسمة وأي تقييم لصحة تجربة RT-qPCR يجب النظر في مدى ملائمتها مع مرجع نسبي- كمي. لذلك، فإن تطوير الحمض النووي المرجعي الشامل ومواد المعايرة للحمض النووي الريبي مفيدة جداً إلا أن الأمر (39، 40)، لن يكون حلاً سحرياً شاملاً (41، 42).

ليس التباين الكثير في قيم التعبير التي أنتجت من تجارب RT-qPCR مجرد اختلافات ناتجة من البروتوكولات التجريبية المستعملة ولكنها ناجمة عن التصحيحات التي تطبقها معالجة البيانات المختلفة اللوغرثمية، كل منها يكون كافتراضات حول البيانات. وعلى الرغم من تفاعل البلمرة المتسلسل الكمي، كثيراً ما أعلن انه المعيار الذهبي، إنما في الواقع هذا "المعيار" هو متغير واحد، والإبلاغ عن النتائج يتطلب قدراً كبيراً من التطور والتحليل والتفسير (43).

### 3 البحوث مقابل تطبيقات التشخيص

يمكن تقسيم تطبيقات تكنولوجيا تفاعل البلمرة التسلسلي الكمي إلى بحوث وتطبيقات تشخيصية. تحلل تطبيقات الأبحاث عادة مجموعة واسعة من الأهداف مع إنتاجية منخفضة نسبياً والعديد من أنواع العينات المختلفة. تتعلق المقاييس الرئيسية التي تحتاج الى معالجتها بفحص حساسية وخصوصية التحليل، والتي تدل في هذا السياق على عدد الأهداف التي يمكن تحليل الكشف عنها سواء كانت قوالب ضبط بدون عينة (NTCs) موثقة بالسلبية على التوالي.

في المقابل، تحلل التطبيقات التشخيصية عادة عدد محدود من الأهداف، ولكنها تتطلب بروتوكولات ذات إنتاجية عالية التي لا تستهدف إلا عدد قليل من أنواع العينات. على الرغم من كل الاعتبارات التي تنطبق على تطبيقات البحوث تنطبق أيضاً على الفحوصات التشخيصية، والفحوصات السريرية التشخيصية التي لديها عدد من الاحتياجات الإضافية التي تحتاج إلى النظر فيها. وتشمل هذه المتطلبات معلومات حول حساسية وخصوصية التحليل، إذ أنه في هذا السياق يشير إلى كيفية ما يكون غالباً الاختبار بإرجاع نتيجة إيجابية في وجود الهدف، وكيف غالباً ما يكون سلبياً في غياب الهدف. علاوة على ذلك، غالباً ما يتم رصد الصحة والدقة في المختبرات وفي ما بينها من قبل برامج مراقبة الجودة الخارجية. وتشمل متطلبات المختبرات السريرية معايير لتوليد نتائج التقارير، وعمماً إذا كان يتم إجراء قياسات متكررة على عينات وبيانات على قرار من بيانات إيجابية كاذبة أو سلبية كاذبة، والتشابه في النتائج في ما بين المختبرات المتعددة التي تستخدم نفس التقنيات أو المختلفة عنها. لقد تم حتى الآن، إجراء بضعة مقارنات بين المختبرات، وقد أكدت كل من

### 5 مراقبة جودة الأحماض النووية

#### 5.1 عينات الحمض النووي الريبي

القياس الكمي للحمض النووي الريبي في العينات المستخرجة مهم جداً لأنه من المستحسن أن تستخدم ذات كميات الحمض النووي الريبي عند المقارنة مع عينات مختلفة. هناك العديد من الإجراءات للقياس الكمي في الاستعمال الشائع، بما في ذلك القياس الطيفي (NanoDrop; Thermo Scientific)، تحاليل الاماعة micro fluidic analysis (Agilent technologies Bionalyzer, Bio Rad Laboratories Experion) الترحيل الكهربائي الهلامي (Qiagen's QIAxcel) أو كشف صبغة الفلوريسنت (Ambion/Applied Biosystems' RiboGreen) تؤدي الطرق إلى نتائج مختلفة مما يجعل محاولة مقارنة البيانات التي تم الحصول عليها مع أساليب مختلفة غير حكيمة (48). الطريقة المفضلة للقياس الكمي للحمض النووي الريبي RiboGreen هو استخدام أصباغ الفلوريسنت على سبيل المثال تلك التي يفضل استعمالها للكشف عن تركيزات منخفضة للهدف، في أي حال فإنه من المستحسن قياس جميع العينات بطريقة واحدة فقط وأن تعطى تقارير بهذه المعلومات.

ومن المهم أيضاً اختبار مدى تلوث الحمض النووي الجيني والإبلاغ عنه وتسجيل معايير الحد الأدنى للكميات المحتملة من هذا التلوث، ومن الضروري أن يُقدّم تقرير عما إذا تمّت معالجة عينة الحمض النووي الريبي مع هاضم الحمض النووي متضمناً نوع هاضم الحمض النووي المستخدم وظروف التفاعل وتقديم تقرير عن النتائج مع مقارنة  $C_q$  الإيجابية من دون وجود ضوابط النسخ العكسي لكل هدف من الحمض النووي.

ومن الضروري أيضاً توثيق تقييم جودة قوالب الحمض النووي الريبي. الحالة الوحيدة التي لا ينطبق عليها هذا الشرط هو عندما تكون كمية الحمض النووي الريبي المستخرج منخفضة جداً ولا تسمح بتقييم الجودة. تنشأ هذه الحالة عندما يتم استخراج الحمض النووي الريبي من الخلايا الأحادية، والبلازما، وغيرها من سوائل الجسم الخالية من الخلايا، وبعض عينات الليزر، و/أو وسط تزرع الأنسجة. كما ينطبق أيضاً في الحالات التي تستمر فيها خطوات الاستخلاص وتفاعل البلمرة المتسلسل الكمي في أنبوب واحد. المعلومات الأساسية يجب أن تقدم تقريراً يتضمن بيانات عن كمية الحمض

هذه الدراسات ضرورة توحيد الفحوصات التشخيصية لتفاعل البلمرة التسلسلي الكمي (44, 45). ومن المقرر أن تعتمد مارسته في ما بين المختبرات ضمن إطار المشروع الأوروبي السابع (التوحيد المعايير والتحسين العام لأدوات ما قبل التحليلية وإجراءات التشخيص في المختبرات SPIDIA <http://www.spidia.eu>.

#### 4 الحصول على العينة، معالجتها، وتحضيرها

يشكل الحصول على عينة مصدر التغيير الأولى للتجربة، وخاصة بالنسبة للتجارب التي تستهدف الحمض النووي الريبي، وذلك لأنه من الممكن أن تتضرر ملامحه بسهولة من جراء عملية جمع العينات وتجهيزها وهناك بعض الاقتراحات بأنه من الممكن تخزين أنسجة جديدة في الثلج دون آثار كبيرة على جودة وتركيز الحمض النووي الريبي (46)، ولكن على الرغم من أن هذا الافتراض قد يكون صحيحاً بالنسبة لبعض الحمض النووي الريبي والأنسجة وبالتالي قد لا تكون قابلة للتطبيق عالمياً لذا من الأفضل أخذ الحيطة والحذر. ونتيجة لذلك، من المهم أن تقدم تقارير تفصيلية عن تاريخ الحصول على عينة الأنسجة وعمّا إذا تمت معالجتها فوراً. إذا لم تتم معالجة العينة فوراً، فمن الضروري أن تعطى تفاصيل عن كيفية الحفاظ عليها ومتى وتحت أي ظرف كانت مخزنة.

وصف موجز للعينة هو أيضاً ضروري، على سبيل المثال يكشف الفحص المجهرى لعينة الورم السرطاني عن نسبة الخلايا السرطانية في العينة حيث ينبغي الإبلاغ عن هذه المعلومات.

استخراج الحمض النووي هو الخطوة الثانية الحاسمة. تعتمد كفاءة الاستخراج على التجانس الكافي ونوع العينة على سبيل المثال داخل الموضع الطبيعي للأنسجة مقابل مرحلة سجل الخلايا المستزرعة وكثافة الهدف والحالة الفيزيولوجية (صحية، سرطانية، أو نخرية) والتعقيدات الوراثية وكمية الكتلة الحيوية. من الضروري ذكر التفاصيل المتعلقة بطريقة استخراج الحمض النووي والأساليب المستخدمة لقياس تركيز الحمض النووي وتقييم نوعيته. إن مثل هذه التفاصيل حاسمة خاصة عند الحمض النووي الريبي المستخرج من عينات شرحت بواسطة الليزر الجزئي وجمدت، فالاختلاف في إجراءات إعداد الأنسجة يكون له تأثير كبير على كل من المستخلص وجودة الحمض النووي الريبي (47).

النووي الريبي، والسلامة، وعدم وجود نسخ عكسي أو مثبطات تفاعل البلمرة المتسلسل. و الجدير بالذكر أن الحمض النووي الريبي يتحلل بشكل ملحوظ في الجسم الحي، وذلك يرجع إلى التنظيم الطبيعي للحمض النووي الريبي المرسل في الاستجابة للمؤثرات البيئية (49). فمصدر هذا التدهور خارج عن سيطرة الباحث؛ وإن أحد مظاهره هو أن عينات الحمض النووي الريبي العالية الجودة يمكن أن تظهر الفرق في تدهور الحمض النووي الريبي المفرد.

يجب أن تقاس نسبة  $A_{280}/A_{260}$  في محلول ذات رقم هيدروجيني محايد، ولكن هذا القياس يكون غير كافي إذا كان الحمض النووي سيستخدم في التحليل الكمي، وخصوصا عندما يكون الهدف هو قياس الاختلافات الطيفية (10 مرات) في التركيزات الخلوية للحمض النووي الريبي المرسل. لا توفر نسبة الامتصاصية مؤشرا لنقاوة الحمض النووي الريبي، لأن وجود الحمض النووي أو بقايا الفينول تؤثر على النسبة. بدلا من ذلك، ينبغي أن يتوفر للمرء أدلة الهلام الكهربائي على الأقل والأفضل من ذلك نتائج تحليل الحمض النووي الريبي الريبوزومي بناء على microfluidics (50). أو بفحص سلامة الجين المرجعي/ الجين المستهدف Bioanalyzer/ نظام استخدام من استخدام نظام Experion لحساب عدد سلامة الحمض النووي الريبي أو رقم مؤشر لجودة الحمض النووي الريبي هو توفر تلك التدابير معلومات كمية عن الحالة العامة لعينة الحمض النووي الريبي. ومن المهم أن نأخذ في الاعتبار، أن هذه الأرقام ترتبط بجودة الحمض النووي الريبي الريبوزومي، ولا يمكن أن نتوقع أن تكون قياسا مطلقا للجودة. يتطلب استخدام اختبار 3':5' كفاءة تفاعل البلمرة التسلسلي في كلا المقاييسات متطابقة تقريبا (51) وألا تكون عرضة لفرق التثبيط. كما يتطلب هذا الاختبار أيضا إنشاء عتبة المعيار الذي يحدد جودة الحمض النووي الريبي الكافية لتحقيق نتائج يمكن الاعتماد عليها. أما من الناحية المثالية ينبغي أن يستهدف الاختبار "سلامة الجينات المرجعية" على الأرجح دون الإنترونات، مع 3':5' بنسبة حد ادنى من 0.2-5 تقريبا. بوضوح، هناك حاجة إلى مزيد من العمل لإنشاء بروتوكول يطبق عالميا، يكون فعالاً من حيث التكلفة وبسيطا لتقييم سلامة الحمض النووي الريبي.

يجب أن يتم التحقق من تثبيط نشاط النسخ العكسي أو تفاعل البلمرة التسلسلي بواسطة التخفيف من العينة (يفضل ذلك) أو باستخدام مثبط عام مثل SPUD (52، 53).

إذا ظهر على عينة الحمض النووي الريبي أي تدهور جزئي، فمن الضروري أن يتم الإبلاغ عن هذه المعلومة، وذلك لأن حساسية الاختبار للكشف عن أقل مستوى للنسخ ربما ينخفض وقد تنتج عن الاختلافات النسبية في تدهور المستنسخ نسب غير صحيحة للهدف.

## 5.2 عينات الحمض النووي

بشكل عام، يكون تدهور الحمض النووي أقل بكثير، ولكن من المهم أن نكون قادرين على تقييم مدى تدهور الحمض النووي في تطبيقات الطب الشرعي، أو في الحالات التي تكون الظروف البيئية قاسية خاصة في مشاهد الجرائم أو في حالات الكوارث الشاملة أو في المواقع التي تنطوي على حالات فقدان الشخص. فقد يؤدي ذلك إلى التدهور في التركيبة الكيميائية للحمض النووي. حجم قطعة صغيرة لقياس تفاعل البلمرة التسلسلي الكمي يساعد على تقليل المشاكل المتعلقة بالاختبار، ولكن تم تطوير أساليب توفر القياس الكمي للجودة الحمض النووي (54) حيث ينبغي النظر فيها مثل هذه الأغراض المتخصصة. تبقى احتمالية التثبيط بشكل عام متغيرة في التطبيقات التي يجب معالجتها في المطبوعة، ومن المهم ضمان عدم وجود مثبطات شاركت في تنقية الحمض النووي مما سوف يؤدي إلى تشوه النتائج، على سبيل المثال، كشف العوامل المسببة للأمراض وتحديد قيمتها (55). بالرغم من أن بعض النظريات مثل تحليل العينات مع الضوابط الإيجابية يمكن أن تستخدم للكشف عن التثبيط فإن تفاعلات البلمرة التسلسلي المختلفة قد لا تكون معرضة بنفس القدر للتثبيط بواسطة مواد شاركت في التنقية مستخلصات الحمض النووي (56، 57). وبالتالي، فمن الأفضل استخدام التخفيفات في الأحماض النووية بشكل روتيني وإثبات أن الانخفاضات الملحوظة في  $C_p$  أو أعداد النسخ تكون مطابقة للنتيجة المتوقعة وتقديم تقرير عن هذه البيانات.

## 6 الاستنساخ العكسي

تُدخل خطوة الاستنساخ العكسي اختلافا كبيرا على فحص RT-qPCR (58، 59). وبالتالي، فمن الضروري إعطاء وصف مفصل للبروتوكول و الكواشف والمواد المستخدمة لتحويل الحمض النووي الريبي إلى [cDNA]. ويجب أن تشمل هذه الوثائق على كمية الحمض النووي للنسخ العكسي و إستراتيجية بادئيات التفاعل، و نوع

الإنزيم، والكمية ودرجة الحرارة، وزمن خطوة الاستنساخ العكسي. فمن المستحسن أن تنفذ خطوة الاستنساخ العكسي مرتين أو ثلاث مرات وأن يكون تركيز الحمض النووي الريبي نفسه في كل عينة (58).

### 7 تفاعل البلمرة المتسلسل الكمي

يجب توفير المعلومات التالية لاختبارات تفاعل البلمرة المتسلسل الكمي: أرقام الانضمام لقاعدة البيانات لكل هدف وللجينات المرجعية، ومواقع المناطق المترجمة في المتتالية لكل بادئ أو كاشف، والسلاسل المتتالية والتركيزات لكل oligonucleotide، بما في ذلك هوياتها ومواقعها وأماكن روابط المصبغات وتغيرات القواعد. ويتطلب أيضا تركيز وهوية إنزيم البلمرة، وكمية القالب (DNA أو cDNA) لكل تفاعل و تركيز المغنيسيوم، والتركيب الكيميائي الدقيقة للمحاليل العازلة (أملاح، ودرجة الحموضة، والمضافات)، وحجم التفاعل. يجب على المحققين أيضا أن يحددوا الأدوات والأجهزة التي استخدمت وكل الوثائق التي تدل على ظروف تفاعل البلمرة المتسلسل. لأن المواد الاستهلاكية المستخدمة تؤثر في تفاعل البلمرة الحراري، فمن الضروري التعرف على الأنابيب، والشرائط، أو الأطباق، ومصنعها. إن درجة الشفافية للمواد البلاستيكية المستخدمة، على سبيل المثال، بيضاء أو شفافة مهمة أيضا لأن المواد البلاستيكية المختلفة تظهر اختلافات جوهريّة في انعكاس الفلوريسنت وحساسيتها (60). عندما تستخدم الأطباق وتؤثر طريقة التغليف (بالحرارة أو اللصق) على تبخر العينات في الأطباق المحيطة وبالتالي ينبغي أن تكون موثقة.

لأن كفاءة تفاعل البلمرة التسلسلي يعتمد بشكل كبير على بادئات التفاعل المستخدمة، لهذا فإن تسلسلها يجب أن ينتشر. هذا الشرط ممكن تماما حتى مع بادئات التفاعل التجارية، لأن هناك سوابق للشركات لجعل تسلسل بادئات التفاعل والكواشف متاحا [http://www.primerdesign.co.uk/research\\_with\\_integrity.asp](http://www.primerdesign.co.uk/research_with_integrity.asp)

بالإضافة إلى ذلك، يشجع تسليمها بقوة إلى قواعد البيانات العامة مثل RTprimerDB، ومع مرور الوقت يمكن أن تصبح قواعد البيانات هذه عالمية في مراكز تبادل المعلومات.

### 7.1 الهيكل الثانوي

لهيكل الحمض النووي المستهدف على سبيل المثال (الجدعية و حلقة هيكل الحمض النووي الريبي الثانوية) تأثير كبير على كفاءة النسخ العكسي وتفاعل البلمرة المتسلسل، ولذلك يجب أن توضع بعين الاعتبار مواقع البادئات، والكاشفات، ومنتج الحمض النووي المتفاعل مع البلمرة المتسلسلة، و قوالب طي الحمض النووي الريبي. وينبغي التحقق من تسلسل الحمض النووي مع برمجيات قابلة للطّي على سبيل المثال: للحمض النووي [mfold http://mfold.bioinfo.rpi.edu/cgi-bin/dna-form1.cgi](http://mfold.bioinfo.rpi.edu/cgi-bin/dna-form1.cgi) أو للحمض النووي الريبي <http://frontend.bioinfo.rpi.edu/applications/mfold/cgi-bin/rna-form1-2.3.cgi> ومن الناحية المثالية، ينبغي أن تكون قوالب بناء الطي متاحة للمراجعين.

### 7.2 الخصوصية

تبقى الأبحاث في ما خص أدوات السيليكون كمادة الجذعة (BLAST) أو ما يعادلها من خصوصية مفيدة في تصميم الاختبار. يجب توثيق أي تماثل ملحوظ لجينات زائفة أو أهداف أخرى غير متوقعة وتقديمه على شكل تسلسل منسق للمراجعة، ومع ذلك، يجب التحقق من صحة خصوصية التجربة مع الأدلة التجريبية المباشرة كقياس درجة الحرارة في زمن انصهار معين وتسلسل الحمض النووي والهلام الكهربائي أو تقييد إنزيم الهضم و معرفة حجم قطعة الحمض النووي.

تكون الخوارزميات حول توقع درجة حرارة انصهار النيوكليوتايد مفيدة جدا للتصميم الأولي، ولكن لا بد من تحديد درجة الحرارة المثلى تجريبيا. على الرغم من أن عملية تحسين البادئات أصبحت غير عصرية، إلا أن سوء تحسين التلدين له تأثير كبير على قياس جودة التفاعل (51). كما أن الوجود الملحوظ لثنائي الجزئيات (الثنوي) التمهيدي في الفحوصات يقلل من كفاءة تفاعل البلمرة المتسلسل في المقاييسات المستندة إلى المسبار وبالتالي يولد نتائج ايجابية كاذبة في المقاييسات المبنية على صبغة السيانين اللامتناسقة المستعملة كـ لون أخضر للحمض النووي (SYBR Green I). حيث انه ينبغي توفير بعض الأدلة من أجل تحسين البادئات وعرضها على المراجعين، من ناحية مثالية في شكل درجة حرارة التلدين الملائمة، تدرج كمية المغنيسيوم، وتعرض في شكل قيم  $C_4$ ، مساحات الاستشعاع مقابل عدد الدورات، و/أو منحنيات الذوبان (61).



## 7.3 الضوابط وأجهزة القياس الكمي

بالإضافة إلى عدم وجود ضوابط للنسخ العكسي في تفاعل البلمرة المتسلسل الكمي المذكور أعلاه، فإنه من الضروري وضع ضوابط إضافية و- أو أجهزة لقياس جميع تفاعلات البلمرة المتسلسل الكمي. تكشف ان تي سي (NTC) تلوث تفاعل البلمرة المتسلسل عندما تستخدم المجسات كما يمكنها تمييز نواتج التضخيم غير المقصودة مثل ثنائي الجزئيات (المتنوي) من نواتج تفاعل البلمرة المتسلسل الناتج من صبغة السيانين اللامتناسقة المستعملة كلون أخضر للحمض النووي (SYBR Green I). وينبغي أن تدرج ان تي سي (NTC) على كل طبق أو مجموعة من العينات وتنشأ بيانات لحالات رفض العينات، على سبيل المثال يمكننا تجاهل قيمة  $C_q$  إذا كان تركيز قيمة  $C_q$  لأقل تركيز غير معروف هي (35).

إنّ الضوابط الإيجابية في الأحماض النووية المستخرجة من العينات التجريبية مفيدة لرصد وفحص المتغيرات التي تحدث مع مرور الوقت، وتكون ضرورية عندما لا يتم تنفيذ منحنيات المعايرة في كل عملية.

قد تكون أجهزة القياس الكمي جزئياً مستهدفة نقية مثل الحمض النووي الريبي الاصطناعي أو قطعة من الحمض النووي التي تمتد لتغطي كامل تفاعل البلمرة المتسلسل، تركيبات بلازميد الحمض النووي، الحمض النووي التكميلي المستنسخ في البلازميدات، الحمض النووي الريبي المستنسخ في المختبر، مجمعات الحمض النووي الريبي المرجعية، الحمض النووي الريبي أو الحمض النووي من عينات بيولوجية معينة، أو المعايير البيولوجية المعترف بها دولياً عندما تصبح متاحة. ينبغي عمل تخفيفي ذي تركيز محدد من ناقل الحمض النووي الريبي (إما الخميرة أو الإشريكية القولونية من 10 إلى 100 نانوجرام لكل لتر). للكشف عن مسببات الأمراض البشرية، يمكن تخفيف المعايير في عينة الضابط السلبي التي تحتوي إما على الحمض النووي الريبي أو الحمض النووي، أو قد تخفف في البلازما البشرية السليمة، وبعد ذلك يمكن إجراء تحلل في وجود الحمض النووي الريبي النووي الناقل. يمكن تحضير القالب في سلسلة من الأعمال التخفيفية لتجنب عملية التجمد والإذابة المتتالية. حيث ينبغي إعداد دفعة جديدة عند الكشف عن تحول في قيمة  $C_q$  ما بين 0.5 إلى 1. بدلا من ذلك، يمكن تخزين محاليل منحنيات المعايرة لمدة أسبوع في 4 درجات مئوية ومن ثم التخلص منها.

أما بالنسبة للفحوصات التشخيصية فينبغي أن يشتمل تفاعل البلمرة المتسلسل الكمي على معايير مستقلة، إن وجدت، الذي يوضع ضمن الفاصل الزمني الخطي للمقاييس. كما يوصى أيضا بمستخلص ضوابط الإيجابية والسلبية.

## 7.4 قياس الأداء

لا بد من تحديد خصائص لقياس الأداء كالتالي:- كفاءة تفاعل البلمرة التسلسلي، والنطاق الديناميكي الخطي، الدقة

7.4.1 كفاءة تفاعل البلمرة التسلسلي:- ترتبط قوة ودقة تفاعل البلمرة المتسلسل الكمي عادة مع كفاءة تفاعل البلمرة المتسلسل، وتكون كفاءته ذات أهميه خاصة عندما يتم التوضيح بأن تركيز مرسل الحمض النووي الريبي ذو علاقة تتناسب مع تلك الجينات المرجعية. وإنّ طريقة دلتا دلتا سي كيو هي إحدى أكثر الطرق المتعارف عليها لتحديد الاختلافات في التركيز في ما بين العينات وتقوم على التطبيع مع جين مرجعي واحد حيث يتم احتساب الفرق بين قيم دلتا الجينات المستهدفة و دلتا الجينات المرجعية ويتم مقارنة دلتا سي كيو  $C_q$  من العينات المختلفة مباشرة. يجب أن يتم تضخيم الجين المستهدف و دلتا الجين المرجعي بطريقة فعالة من أجل مقارنتها بدقة. لا تهم شهرة الطريقة بقدر ما تكون دقتها الأهم. ومع ذلك، طورت نماذج أكثر عمومية لتصحيح الاختلافات في كفاءة التضخيم الكمي (62)، والسماح باستخدام جينات مرجعية متعددة (30).

كفاءة تضخيم تفاعل البلمرة المتسلسل يجب أن تقرأ في منحنيات المعايرة، لأن مثل هذه المعايرة توفر بساطة، وسرعة، ومؤشر استنساخ لمتوسط كفاءة تفاعل البلمرة المتسلسل. وينبغي أن تحدد كفاءة التضخيم من منحدر سجل الخطي لمنحنى المعايرة، وعلى وجه التحديد، كفاءة تفاعل البلمرة المتسلسل المساوية ل  $10^{-\text{slope}}$  عندما يكون لوغاريتم تركيز القالب الأول (المتغير المستقل) مرسوم على المحور السيني و سي كيو  $C_q$  (المتغير التابع) مرسوم على المحور الصادي. فإن الحد النظري الاقصى "100%" يشير إلي أن كميته المنتج يتضاعف في كل دورة، فمن الناحية المثالية يتم تقدير متوسط كفاءات سي أي أو اس أي CI or SE من منحنيات المعايرة المتكررة.

يجب تضمين منحنيات المعايرة لكل هدف كمي مع المخطوطة المقدمة بحيث يمكن إتاحة هذه المعلومات للمراجعين؛ يجب تضمين المنحدرات الصادية المستمدة من تلك الانحناءات في المنشور. إن الاختلافات في كفاءة تفاعل البلمرة التسلسلي سوف ينتج عنه منحنيات معايرة ذات انحدارات مختلفة، ونتيجة لذلك، فإن الاختلافات بين قيم سي كيو C<sub>q</sub> للاهداف والمراجع لن تظل ثابتة في ظل تغيير كمية القالب، وعليه سوف تكون حسابات التركيزات النسبية غير دقيقة، مما يسفر عن نتائج مضللة.

حيث يجب الاشتباه في قيم ال سي كيو C<sub>q</sub> الاقل من 40 نسبه لكفائها المتدنية ويفضل عدم ذكرها. مع ذلك، فإن استخدام قطع ال سي كيو C<sub>q</sub> التعسفي ليست مثالية، لأنها قد تكون إما منخفضة جدا (القضاء على نتائج صحيحة) أو عالية جدا (زيادة نتائج ايجابيه كاذبة) (26).

**7.4.2 النطاق الديناميكي الخطي** يجب أن يوصف النطاق الديناميكي للتفاعل علي أنه تفاعل خطي (من أعلى إلى أدنى عدد نسخ قابلة للقياس الكمي التي أنشئت بواسطة منحني المعايرة). واعتمادا على القالب المستخدم لتوليد منحنيات المعايرة، وينبغي أن يشمل النطاق الديناميكي ما لا يقل عن 3 ترتيبات وان تكون مثالية ويتراوح تركيزها بين 5 or 6 log<sub>10</sub>. يجب أن يتضمن منحني المعايرة الخطي الفاصل الزمني الأحماض النووية المراد قياس كميتها، لأن المستويات الأقل تركيزا في التحديد الكمي تكون عادة ضعيفة، كما ينبغي أن يحدد الاختلاف في أقل تركيز ضمن الفاصل الزمني الخطي. يجب ذكر معاملات الارتباط (قيم R<sup>2</sup>) ومن الناحية المثالية، ينبغي أن تقدم CIs ديناميكية خطية من خلال مجموعة كاملة.

**7.4.3 LOD** يعرف LOD بأن التركيز الأقل الذي يتم فيه الكشف عن 95% من العينات الايجابية. وبعبارة أخرى، ضمن مجموعة متكررة يحتوي الهدف فيها علي اقل نسبة تركيز ولا تكون نسبه فشل التفاعل أكثر من 5%. أن العدد الأدنى من نسخ تفاعل البلمرة التسلسل محدود، ولا يمكن استخراج 3 نسخ تفاعل البلمرة التسلسل. وفي هذه الحال إذا تم إجراء تفاعلات متعددة حينها يمكن الحصول علي القياس الكمي لأقل تركيز عبر نظام تفاعل البلمرة التسلسل الرقمي. (29، 63، 64). في الواقع، يمكن التحقق من معايرة التركيز عن طريق الحد من التخفيف لتظهر أن نسبة التفاعلات الفاشلة والناجحة تتبع توزيع بواسون.

**7.4.4 الدقة** هنالك تفسيرات كثيرة حول الاختلاف في نتائج تفاعل البلمرة التسلسل الكمي بما في ذلك الاختلاف في درجات الحرارة التي تؤثر على نهاية فترة التلدين، والتمسيخ، والاختلاف في التركيز والمتمثلة في أخطاء المص، والعشوائية.

تتغير عادة الدقة في تفاعل البلمرة التسلسل الكمي مع تغير التركيز وانخفاض عدد النسخ المستنسخة ومن الناحية المثالية يجب ذكر الاختلافات المتكررة التي تتم داخل التجربة في فقرة تسمى بمجالات الخطأ اس دي SD أو في شكل منحنيات المعايرة مع العينات المكررة. (29) CIs لكن يمكن استخدامها للتعبير عن التباين في أعداد النسخ أو التركيزات. وينبغي التمييز مع Cqs مع CVs لا ينبغي استخدام هذا الاختلاف الفني مع الاختلاف البيولوجي، حيث أن التطابق البيولوجي يمكن أن يعطينا الدلالة الإحصائية للاختلافات في نتائج تفاعل البلمرة التسلسل الكمي بين الجماعات أو العلاجات. أما في فحوصات التشخيص فقد يكون من الضروري أيضا أن يقدم تقرير عن دقة التجربة بين المواقع والشركات المختلفة.

### MULTIPLEX qPCR 7.5

قد زادت الملتيلكس إلي حد كبير من طاقة تحليل تفاعل البلمرة التسلسل الكمي خاصة عند تطبيقها علي الكشف التلقائي للطفرات (67). حيث يتطلب ذلك عرض أدلة تثبت أن القياس الكمي الدقيق لأهداف متعددة في أنبوب واحد ليس اختلالا تكون متساوية حتى عندما يستخدم الفحص لهدف واحد. هذا الشأن له أهمية خاصة (LOD) أن كفاءة الفحص بمعنى عند تشارك أهداف أقل في التضخيم مع أهداف وفيرة للغاية.

### 8 تحليل البيانات

يتضمن تحليل البيانات فحص البيانات الخام، وتقييم جودتها ووثوقيتها، واستخراج النتائج وذكرها حيث يتم وصف مجموعة البيانات المختلفة وطرق عملها حيث أظهر تقييم للبيانات أن تحاليل تفاعل البلمرة التسلسل الكمي تختلف كثيرا في أدائها (68).

ومن الضروري توفير معلومات مفصلة عن طرق تحليل البيانات ومدى فعاليتها، جنبا إلى جنب مع مواصفات البرمجيات المستخدمة. يجب ذكر أساليب لتحديد القيم المتطرفة والتصرف في مثل هذه البيانات. يتطلب توثيق

## 8.2 المتغيرة

دقة الفحص التعرف على Cq وعرض التركيزات المقابلة أو القيم (95% CIs) الأساليب الإحصائية المستخدمة لتقييم الفروق على سبيل المثال هذه يجب أن تشمل المعلومات كل من البيانات المتكررة والمستنسخة، إذا كانت متوفرة، وكما نوقش على ذكر أن قيمة سي C<sub>q</sub> وبالتالي مضله في حساب عدد النسخ المستنسخة. مقارنة ب سي C<sub>q</sub> تكون غير ملائمة يجب توفير معلومات عن الأساليب المستخدمة لتقييم الدقة، بما في ذلك دلالة إحصائية لمختلف التقارير بين المجموعات.

## 8.1 التطبيق

التطبيق هو عنصر أساسي موثوق به في تجارب تفاعل البلمرة المتسلسل الكمي لأن هذه العملية تسيطر على التغيرات في العائد المستخلص ومحصلة الاستنساخ العكسي وكفاءة التضخيم و بالتالي يمكننا وضع مقارنات بين تركيزات الحمض النووي الريبي في العينات المختلفة. إن استخدام الجينات المرجعية كمتحكم داخلي هي أكثر الطرق شيوعا لتطبيق بيانات الحمض النووي الريبي وهي من الطرق المتوافق عليها في إستراتيجية التطبيق (69). يجب التحقق من صحة فائدتها بتجربتها على أنسجة معينة أو أنواع خلايا بتصاميم تجريبية محددة. و للأسف، وعلى الرغم من وجود زيادة الوعي لأهمية التحقق من صحة المنهجية وعلى الرغم من أن المعروف وعلى نطاق واسع أن الآثار المحتملة مضلة إلى حد كبير من استخدام الجينات المرجعية بصورة غير ملائمة للتطبيق إلا أن هذه الاعتبارات أيضا لا تزال تهمل على نطاق واسع (70). ونتيجة لذلك، لا تزال العديد من التحليلات الجزيئية من تفاعلات البلمرة المتسلسل الكمي تحتوي على بيانات سيئة التطبيق.

يتضمن التطبيق ذكر نسب تركيزات الحمض النووي الريبي المرسل في الجينات التي تهمل تلك الجينات المرجعية حيث ينبغي التعبير عن الحمض النووي الريبي المرسل بطريقة ثابتة علي أن تظهر تركيزاته ارتباط قوي مع كمية الحمض النووي الريبي المرسل الموجودة في العينات. إن التطبيق ضد إحدى الجينات المرجعية غير مقبول إلا إذا كان المحققون سيقدمون أدلة واضحة ليؤكدوا للمراجعين بأنه ثابت التعبير في ظل الظروف التجريبية الموضحة والعدد الأمثل واختيار الجينات المرجعية يجب تحديده تجريبيا و بالطرق المذكورة (71، 73).

ينافس التفاوت المتأصل في النظام البيولوجي أو يتجاوز التجربة المتغيرة بين المجموعات وغالبا ما يلاحظ هذا الاختلاف عندما تستخدم التطبيقات البيولوجية لزيادة الدلالة الإحصائية للتجربة. على الرغم من أن الاختلافات بين التطبيقات البيولوجية قد تكون كبيرة، إلا أن كمية كافية تسمح بتمييز اصغر الاختلافات في التجربة.

نشرت مؤخرا مقالات تقدم مثلا نموذجيا للتعامل مع مثل هذه البيانات وكيفية استخلاص البيانات ذات المغزى من الناحية البيولوجية من المعايير خاضعة للتغيير بيولوجية عالية من المقاييس المعرضة للاختلافات البيولوجية. هناك العديد من العوامل التي تساهم في تباين التجربة وتؤثر على التطبيقات البيولوجية اللازمة لتحقيق قوة إحصائية معينة وبناء على ذلك، فإن تحليل القوة مفيد لتحديد عدد العينات اللازمة لاستنتاجات صحيحة.

## 8.3 التحليل النوعي

تستخدم تقنية تفاعل البلمرة المتسلسل للكشف عن مجرد وجود الحمض النووي، بدلا من تحديد ذلك بدقة ويشار إليه بتفاعل البلمرة المتسلسل النوعي والذي يستخدم على نطاق واسع في تشخيص العوامل المسببة للأمراض. إن المشكلة في التقييم الكمي أو النوعي لتقنية تفاعل البلمرة المتسلسل هو أن دقة الإجابة ب لا أو نعم تحتاج إلي معرفه حساسية التقنية عند نهاية التفاعل. وبناء على ذلك يجب تقديم معلومات الفحص النوعي و خصائص الأداء والفحص خاصة فيما يتعلق بالنقاط التي نوقشت في الأقسام 7.4.2 و 7.4.3.

## الاستنتاجات

إن ضرورة ضمان التدابير لضمان الجودة لفحوصات qPCR و RT-qPCR المتعارف عليها. (25، 44، 75-86) إن التقليدية بإمكانها تحديد كمية الحمض النووي بدقة شديدة، PCR و تقنية qPCR هي الفرق الرئيسي بين التقنية، حيث انه يجب على الشخص تمييز هذا الاختلاف وعدم الافتراض أن تقنية تفاعل البلمرة المتسلسل يمكن أن تترجم مباشرة نحو شكل تفاعل بلمرة تسلسلي كمي. الجدول 1 يقدم قائمة مرجعية لإعداد تقارير الدراسة. إن البنود التي تعتبر ضرورية هي مطلوبة بحيث أن هنالك حاجة للسماح للمراجعين بتقييم العمل وباحثين آخرين إعادة إنتاجه (E) ومن العناصر المرغوب فيها أيضا والتي

ينبغي أن تندرج إذا أمكن لكنه قد لا يكون متاحا في جميع الحالات حيث (D) أن الامتثال السليم لجميع البنود المدرجة على القائمة المرجعية ليس ضروريا للكشف الأولي عن مئات الأهداف. تم التعرف مرة واحدة في مجموعة محدودة من الأهداف (اقل من 20 هدفا) ومع ذلك ينبغي وصف أداء الاختبار كما هو مفصل من قبل المرجعية المضافة

<http://www.rdml.org/miqe/>.

وباختصار، إن الغرض من هذه المبادئ التوجيهية يقوم على 3 أشياء:-

- 1 تمكين المؤلفين من تصميم وتقديم تقارير تجارب تفاعل البلزمة التسلسلي الكمي التي لديها القدر الأكبر من القيمة الكامنة ونوعية المخطوطات المقدمة ومقارنتها بالمعايير المعمول بها.
- 2 السماح للمراجعين والمحريين قياس جودة تقنية المخطوطات المقدمة لقاء مقياس معتمد
- 3 تسهيل إعادة التجارب الموصوفة في الدراسات المنشورة التي تتبع هذه المبادئ التوجيهية.

ونتيجة لذلك، ان الاستقصاء الذي يستعمل هذه التكنولوجيا الواسعة والمطبقة سوف ينتج معطيات تكون أكثر اتساقا وأكثر قابلية للمقارنة و في نهاية المطاف، ستكون جديرة بالثقة بصورة أكبر.

تعريب صحيح عن النص الانكليزي المرفق ربطا  
المرجم المحلف ميلاد نجيم  
بيروت، في 20 مايو / أيار 2013

إقرار: تم تعريب هذا المستند تحت الإشراف العلمي والتقني للدكتور عفيف م. عبد النور. مع الشكر الخاص للدكتور عصام أزهر والدكتور ستيف حركة. علماً أنّ هؤلاء الباحثين هم أعضاء وحدة الكائنات المعدية الخاصة في مركز الملك فهد للبحوث الطبية، جامعة الملك عبد العزيز، المملكة العربية السعودية.

**Author Contributions:** All authors confirmed they have contributed to the intellectual content of this paper and have met the following 3 requirements: (a) significant contributions to the conception and design, acquisition of data, or analysis and interpretation of data; (b) drafting or revising the article for intellectual content; and (c) final approval of the published article.

**Authors' Disclosures of Potential Conflicts of Interest:** Upon manuscript submission, all authors completed the Disclosures of Potential Conflict of Interest form. Potential conflicts of interest:

**Employment Leadership:** J. Hellemans, Biogazelle; J. Vandessepele, Biogazelle; C.T. Wittwer, Idaho Technology.

**Consultant or Advisory Role:** R. Mueller, DermTech International.  
**Stock Ownership:** R. Mueller, Sequenom; C.T. Wittwer, Idaho Technology.

**Honoraria:** None declared.

**Research Funding:** S.A. Bustin, Bowel and Cancer Research, registered charity number 1119105; J. Hellemans, Fund for Scientific Research Flanders; M. Kubista, grant agency of the Academy of Sciences, Czech Republic (grants IAA500520809 and AV0250520701); C.T. Wittwer, ARUP Institute for Clinical and Experimental Pathology and Idaho Technology.

**Expert Testimony:** None declared.

**Role of Sponsor:** The funding organizations played no role in the design of study, choice of enrolled patients, review and interpretation of data, or preparation or approval of manuscript.

## References

- Higuchi R, Dollinger G, Walsh PS, Griffith R. Simultaneous amplification and detection of specific DNA sequences. *Biotechnology (N Y)* 1992; 10:413–7.
- Higuchi R, Fockler C, Dollinger G, Watson R. Kinetic PCR analysis: real-time monitoring of DNA amplification reactions. *Biotechnology (N Y)* 1993; 11:1026–30.
- Wittwer CT, Herrmann MG, Moss AA, Rasmussen RP. Continuous fluorescence monitoring of rapid cycle DNA amplification. *Biotechniques* 1997; 22: 130–8.
- Bustin SA. Absolute quantification of mRNA using real-time reverse transcription polymerase chain reaction assays. *J Mol Endocrinol* 2000; 25: 169–93.
- Kubista M, Andrade JM, Bengtsson M, Forootan A, Jonak J, Lind K, et al. The real-time polymerase chain reaction. *Mol Aspects Med* 2006; 27:95–125.
- Bernard PS, Wittwer CT. Real-time PCR technology for cancer diagnostics. *Clin Chem* 2002; 48: 1178–85.
- Mackay IM, Arden KE, Nitsche A. Real-time PCR in virology. *Nucleic Acids Res* 2002; 30:1292–305.
- Mackay IM. Real-time PCR in the microbiology laboratory. *Clin Microbiol Infect* 2004; 10:190–212.
- Bustin SA, Mueller R. Real-time reverse transcription PCR (qRT-PCR) and its potential use in clinical diagnosis. *Clin Sci (Lond)* 2005; 109: 365–79.
- Bustin SA, Mueller R. Real-time reverse transcription PCR and the detection of occult disease in colorectal cancer. *Mol Aspects Med* 2006; 27: 192–223.
- van den Berg RJ, Vaessen N, Endtz HP, Schulm T, van der Vorm ER, Kuijper EJ. Evaluation of real-time PCR and conventional diagnostic methods for the detection of *Clostridium difficile*-associated diarrhoea in a prospective multicentre study. *J Med Microbiol* 2007; 56:36–42.
- Bustin SA, Nolan T. Pitfalls of quantitative real-time reverse-transcription polymerase chain reaction. *J Biomol Tech* 2004; 15:155–66.
- Garson JA, Huggett JF, Bustin SA, Pfaffl MW, Benes V, Vandesompele J, Shipley GL. Unreliable real-time PCR analysis of human endogenous retrovirus-W (HERV-W) RNA expression and DNA copy number in multiple sclerosis. *AIDS Res Hum Retroviruses*. Forthcoming 2009.
- Huang T, Bohlenius H, Eriksson S, Parcy F, Nilsson O. The mRNA of the *Arabidopsis* gene FT moves from leaf to shoot apex and induces flowering. *Science* 2005; 309:1694–6.
- Bohlenius H, Eriksson S, Parcy F, Nilsson O. Retraction. *Science* 2007; 316:367.
- Brazma A, Hingamp P, Quackenbush J, Sherlock G, Spellman P, Stoeckert C, et al. Minimum information about a microarray experiment (MIAME)—toward standards for microarray data. *Nat Genet* 2001; 29:365–71.
- Taylor CF, Paton NW, Lilley KS, Binz PA, Julian RK Jr, Jones AR, et al. The minimum information about a proteomics experiment (MIAPE). *Nat Biotechnol* 2007; 25:887–93.
- Field D, Garrity G, Gray T, Morrison N, Selengut J, Sterk P, et al. The minimum information about a genome sequence (MIGS) specification. *Nat Biotechnol* 2008; 26:541–7.
- Echeverri CJ, Beachy PA, Baum B, Boutros M, Buchholz F, Chanda SK, et al. Minimizing the risk of reporting false positives in large-scale RNAi screens. *Nat Methods* 2006; 3:777–9.
- Haney SA. Increasing the robustness and validity of RNAi screens. *Pharmacogenomics* 2007; 8: 1037–49.
- Sansone SA, Fan T, Goodacre R, Griffin JL, Hardy NW, Kaddurah-Daouk R, et al. The metabolomics standards initiative. *Nat Biotechnol* 2007; 25:846–8.
- Taylor CF, Field D, Sansone SA, Aerts J, Apweiler R, Ashburner M, et al. Promoting coherent minimum reporting guidelines for biological and biomedical investigations: the MIBBI project. *Nat Biotechnol* 2008; 26:889–96.
- Burns MJ, Valdivia H, Harris N. Analysis and interpretation of data from real-time PCR trace detection methods using quantitation of GM soya as a model system. *Anal Bioanal Chem* 2004; 378: 1616–23.
- Burns MJ, Nixon GJ, Foy CA, Harris N. Standardisation of data from real-time quantitative PCR methods – evaluation of outliers and comparison of calibration curves. *BMC Biotechnol* 2005; 5:31.
- Ellison SL, English CA, Burns MJ, Keer JT. Routes to improving the reliability of low level DNA analysis using real-time PCR. *BMC Biotechnol* 2006; 6:33.
- Burns MJ, Valdivia H. Modelling the limit of detection in real-time quantitative PCR. *Eur Food Res Technol* 2008; 226:1513–24.
- Lefever S, Hellemans J, Pattyn F, Przybylski DR, Taylor C, Geurts R, et al. RDML: structured language and reporting guidelines for real-time quantitative PCR data. *Nucleic Acids Res* [Epub ahead of print 2009 Feb 17]. Available at: <http://nar.oxfordjournals.org/cgi/content/abstract/gkp056>.
- Wittwer CT, Kusakawa N. Real-time PCR. In: Persing DH, Tenover FC, Versalovic J, Tang JW, Unger ER, Helman DA, White TJ, eds. *Molecular microbiology: diagnostic principles and practice*. Washington: ASM Press; 2004. p 71–84.
- Schmittgen TD, Livak KJ. Analyzing real-time PCR data by the comparative  $C_t$  method. *Nat Protoc* 2008; 3:1101–8.
- Hellemans J, Mortier G, De Paep A, Speleman F, Vandesompele J. qBase relative quantification framework and software for management and automated analysis of real-time quantitative PCR data. *Genome Biol* 2007; 8:R19.
- de la Grange P, Dutertre M, Correa M, Auboeuf D. A new advance in alternative splicing databases: from catalogue to detailed analysis of regulation of expression and function of human alternative splicing variants. *BMC Bioinformatics* 2007; 8:180.
- Ben-Dov C, Hartmann B, Lundgren J, Valcarcel J. Genome-wide analysis of alternative pre-mRNA splicing. *J Biol Chem* 2008; 283:1229–33.
- Bjornsson HT, Albert TJ, Ladd-Acosta CM, Green RD, Rongione MA, Middle CM, et al. SNP-specific array-based allele-specific expression analysis. *Genome Res* 2008; 18:771–9.
- Pattyn F, Robbrecht P, De Paep A, Speleman F, Vandesompele J. RTPrimerDB: the real-time PCR primer and probe database, major update 2006. *Nucleic Acids Res* 2006; 34:D684–8.
- Pattyn F, Speleman F, De Paep A, Vandesompele J. RTPrimerDB: the real-time PCR primer and probe database. *Nucleic Acids Res* 2003; 31: 122–3.
- Gygi SP, Rochon Y, Franza BR, Aebersold R. Correlation between protein and mRNA abundance in yeast. *Mol Cell Biol* 1999; 19:1720–30.
- Schmidt MW, Houseman A, Ivanov AR, Wolf DA. Comparative proteomic and transcriptomic profiling of the fission yeast *Schizosaccharomyces pombe*. *Mol Syst Biol* 2007; 3:79.
- Landi D, Gemignani F, Naccarati A, Pardini B, Vodicka P, Vodickova L, et al. Polymorphisms within micro-RNA-binding sites as a standard risk of sporadic colorectal cancer. *Carcinogenesis* 2008; 29: 579–84.
- Cronin M, Ghosh K, Sistare F, Quackenbush J, Vilker V, O'Connell C. Universal RNA reference materials for gene expression. *Clin Chem* 2004; 50:1464–71.
- Novoradovskaya N, Whitfield ML, Basehore LS, Novoradovsky A, Pesich R, Usary J, et al. Universal Reference RNA as a standard for microarray experiments. *BMC Genomics* 2004; 5:20.
- Gingeras TR. RNA reference materials for gene expression studies. Difficult first steps. *Clin Chem* 2004; 50:1289–90.
- Joseph LJ. RNA reference materials for gene expression studies. RNA metrology: forecast calls for partial clearing. *Clin Chem* 2004; 50:1290–2.
- Bustin SA, Benes V, Nolan T, Pfaffl MW. Quantitative real-time RT-PCR—a perspective. *J Mol Endocrinol* 2005; 34:597–601.
- Ramsden SC, Daly S, Geilenkeuser WJ, Duncan G, Hermitte F, Marubini E, et al. EQUAL-quant: an international external quality assessment scheme for real-time PCR. *Clin Chem* 2006; 52:1584–91.
- Damond F, Benard A, Ruelle J, Alabi A, Kupfer B, Gomes P, et al. Quality control assessment of human immunodeficiency virus type 2 (HIV-2) viral load quantification assays: results from an international collaboration on HIV-2 infection in 2006. *J Clin Microbiol* 2008; 46:2088–91.
- Micke P, Ohshima M, Tahmasebpour S, Ren ZP, Ostman A, Ponten F, Botling J. Biobanking of fresh frozen tissue: RNA is stable in nonfixed surgical specimens. *Lab Invest* 2006; 86:202–11.
- Morrogh M, Olvera N, Bogomolny F, Borgen PI, King TA. Tissue preparation for laser capture microdissection and RNA extraction from fresh frozen breast tissue. *Biotechniques* 2007; 43: 41–2, 4, 6 passim.
- Bustin SA. Real-time, fluorescence-based quantitative PCR: a snapshot of current procedures and preferences. *Expert Rev Mol Diagn* 2005; 5: 493–8.
- Doma MK, Parker R. RNA quality control in eukaryotes. *Cell* 2007; 131:660–8.
- Fleige S, Pfaffl MW. RNA integrity and the effect on the real-time qRT-PCR performance. *Mol Aspects Med* 2006; 27:126–39.
- Nolan T, Hands RE, Bustin SA. Quantification of mRNA using real-time RT-PCR. *Nat Protoc* 2006; 1:1559–82.
- Nolan T, Hands RE, Ogunkolade BW, Bustin SA. SPUD: a qPCR assay for the detection of inhibitors in nucleic acid preparations. *Anal Biochem* 2006; 351:308–10.
- Ferns RB, Garson JA. Development and evaluation of a real-time RT-PCR assay for quantification of cell-free human immunodeficiency virus type 2 using a brome mosaic virus internal control. *J Virol Methods* 2006; 135:102–8.

54. Swango KL, Hudlow WR, Timken MD, Buoncris-tiani MR. Developmental validation of a multiplex qPCR assay for assessing the quantity and quality of nuclear DNA in forensic samples. *Forensic Sci Int* 2007;170:35–45.
55. Garson JA, Grant PR, Ayliffe U, Ferns RB, Tedder RS. Real-time PCR quantitation of hepatitis B virus DNA using automated sample preparation and murine cytomegalovirus internal control. *J Virol Methods* 2005;126:207–13.
56. Huggett JF, Novak T, Garson JA, Green C, Morris-Jones SD, Miller RF, Zumla A. Differential suscep-tibility of PCR reactions to inhibitors: an important and unrecognised phenomenon. *BMC Res Notes* 2008;1:70.
57. Ståhlberg A, Aman P, Ridell B, Mostad P, Kubista M. Quantitative real-time PCR method for detec-tion of B-lymphocyte monoclonality by comparison of  $\kappa$ - and  $\lambda$  immunoglobulin light chain expression. *Clin Chem* 2003;49:51–9.
58. Ståhlberg A, Hakansson J, Xian X, Semb H, Kubista M. Properties of the reverse transcription reaction in mRNA quantification. *Clin Chem* 2004;50:509–15.
59. Ståhlberg A, Kubista M, Pfaffl M. Comparison of reverse transcriptases in gene expression analysis. *Clin Chem* 2004;50:1678–80.
60. Reiter M, Pfaffl M. Effects of plate position, plate type and sealing systems on real-time PCR results. *Biotechnol Biotechnol Equip* 2008;22: 824–8.
61. Ririe KM, Rasmussen RP, Wittwer CT. Product dif-ferentiation by analysis of DNA melting curves during the polymerase chain reaction. *Anal Bio-chem* 1997;245:154–60.
62. Pfaffl MW. A new mathematical model for relative quantification in real-time RT-PCR. *Nucleic Acids Res* 2001;29:E45.
63. Dube S, Qin J, Ramakrishnan R. Mathematical analysis of copy number variation in a DNA sample using digital PCR on a nanofluidic device. *PLoS ONE* 2008;3:e2876.
64. Vogelstein B, Kinzler KW. Digital PCR. *Proc Natl Acad Sci U S A* 1999;96:9236–41.
65. Elnifro EM, Ashshi AM, Cooper RJ, Klapper PE. Multiplex PCR: optimization and application in diagnostic virology. *Clin Microbiol Rev* 2000;13: 559–70.
66. Wittwer CT, Herrmann MG, Gundry CN, Elenitoba-Johnson KS. Real-time multiplex PCR assays. *Methods* 2001;25:430–42.
67. Elenitoba-Johnson KS, Bohling SD, Wittwer CT, King TC. Multiplex PCR by multicolor fluorimetry and fluorescence melting curve analysis. *Nat Med* 2001;7:249–53.
68. Karlen Y, McNair A, Perseguers S, Mazza C, Mer-mod N. Statistical significance of quantitative PCR. *BMC Bioinformatics* 2007;8:131.
69. Huggett J, Dheda K, Bustin S, Zumla A. Real-time RT-PCR normalisation; strategies and consider-ations. *Genes Immun* 2005;6:279–84.
70. Gutierrez L, Mauriat M, Guenin S, Pelloux J, Lefe-bvre JF, Louvet R, et al. The lack of a systematic validation of reference genes: a serious pitfall undervalued in reverse transcription-polymerase chain reaction (RT-PCR) analysis in plants. *Plant Biotechnol J* 2008;6:609–18.
71. Vandesompele J, De Preter K, Pattyn F, Poppe B, Van Roy N, De Paepe A, Speleman F. Accurate nor-malization of real-time quantitative RT-PCR data by geometric averaging of multiple internal con-trol genes. *Genome Biol* 2002;3: RESEARCH0034.
72. Pfaffl MW, Horgan GW, Dempfle L. Relative expression software tool (REST) for group-wise comparison and statistical analysis of relative expression results in real-time PCR. *Nucleic Acids Res* 2002;30:e36.
73. Andersen CL, Jensen JL, Orntoft TF. Normalization of real-time quantitative reverse transcription-PCR data: a model-based variance estimation approach to identify genes suited for normaliza-tion, applied to bladder and colon cancer data sets. *Cancer Res* 2004;64:5245–50.
74. Willems E, Leyns L, Vandesompele J. Standard-ization of real-time PCR gene expression data from independent biological replicates. *Anal Bio-chem* 2008;379:127–9.
75. Apfalter P, Reischl U, Hammerschlag MR. Inhouse nucleic acid amplification assays in research: How much quality control is needed before one can rely upon the results? *J Clin Microbiol* 2005;43:5835–41.
76. Ciabatti I, Froio A, Gatto F, Amaddeo D, Marchesi U. In-house validation and quality control of real-time PCR methods for GMO detection: a practi-cal approach. *Dev Biol (Basel)* 2006;126: 79–86; discussion 324–5.
77. de Cremoux P, Bieche I, Tran-Perennou C, Vignaud S, Boudou E, Asselain B, et al. Inter-laboratory quality control for hormone-dependent gene expression in human breast tumors using real-time reverse transcription-polymerase chain reaction. *Endocrine Relat Cancer* 2004;11:489–95.
78. de Vries TJ, Fourkour A, Punt CJ, van de Locht LT, Wobbes T, van den Bosch S, et al. Reproducibility of detection of tyrosinase and MART-1 transcripts in the peripheral blood of melanoma patients: a quality control study using real-time quantitative RT-PCR. *Br J Cancer* 1999;80:883–91.
79. Gabert J, Beillard E, van der Velden VH, Bi W, Grim-wade D, Pallisgaard N, et al. Standardization and quality control studies of 'real-time' quantitative reverse transcriptase polymerase chain reaction of fusion gene transcripts for residual disease detection in leukemia – a Europe Against Cancer program. *Leukemia* 2003;17:2318–57.
80. Lemmer K, Donoso Mantke O, Bae HG, Groen J, Drosten C, Niedrig M. External quality control assessment in PCR diagnostics of dengue virus infections. *J Clin Virol* 2004;30:291–6.
81. Marubini E, Verderio P, Raggi CC, Pazzagli M, Orlando C. Statistical diagnostics emerging from external quality control of real-time PCR. *Int J Biol Markers* 2004;19:141–6.
82. Raggi CC, Verderio P, Pazzagli M, Marubini E, Simi L, Pinzani P, et al. An Italian program of external quality control for quantitative assays based on real-time PCR with Taq-Man probes. *Clin Chem Lab Med* 2005;43:542–8.
83. Sjöholm MI, Dillner J, Carlson J. Assessing quality and functionality of DNA from fresh and archival dried blood spots and recommendations for qual-ity control guidelines. *Clin Chem* 2007;53: 1401–7.
84. Wang X, Jia S, Meyer L, Xiang B, Chen LY, Jiang N, et al. Comprehensive quality control utilizing the prehybridization third-dye image leads to accurate gene expression measurements by cDNA microarrays. *BMC Bioinformatics* 2006;7:378.
85. Winters MA, Tan LB, Katzenstein DA, Merigan TC. Biological variation and quality control of plasma human immunodeficiency virus type 1 RNA quan-titation by reverse transcriptase polymerase chain reaction. *J Clin Microbiol* 1993;31: 2960–6.
86. van der Velden VH, Panzer-Grumayer ER, Cazza-niga G, Flohr T, Sutton R, Schrauder A, et al. Opti-mization of PCR-based minimal residual disease diagnostics for childhood acute lymphoblastic leukemia in a multi-center setting. *Leukemia* 2007;21:706–13.
